# Supplementary material for: Hypervalent iodine mediated alkene difunctionalization of vinylphenols: diastereoselective synthesis of substituted indoles and indolizines
Source: Royal Society of Chemistry journal article supplement (doi:10.1039/c5cc00441a), 2015-01-01

# **Hypervalent iodine-mediated alkene difunctionalization of vinylphenols: diastereoselective synthesis of substituted indoles and indolizines**

Kai Zhang, Hang Wang, Jingfeng Zheng, Lei Yu and Hanfeng Ding\*

*Department of Chemistry, Zhejiang University, 148 Tianmushan Road, Hangzhou 310028, China; Jiangsu Co-innovation Center for Prevention and Control of Important Animal Infectious Diseases and Zoonoses, Yangzhou University, Yangzhou, Jiangsu 225002, China.*

*E-mail: hfding@zju.edu.cn*

## **Supporting Information**

- I) General Experimental Methods
- II) General Experimental Procedure and Characterization Data
- III) References
- IV)  $^1\text{H}$  and  $^{13}\text{C}$  NMR Spectra of Compounds

## D) General Experimental Methods

All reactions were carried out under a nitrogen or argon atmosphere with dry solvents under anhydrous conditions, unless otherwise noted. Dry tetrahydrofuran (THF), pentane, diethyl ether (Et<sub>2</sub>O), 1,2-dimethoxyethane (DME), 1,4-dioxane, methylene chloride (CH<sub>2</sub>Cl<sub>2</sub>), chloroform (CHCl<sub>3</sub>) obtained by passing commercially available pre-dried, oxygen-free formulations through activated alumina columns. Ethyl acetate (EtOAc), diethyl ether (Et<sub>2</sub>O), *N,N*-dimethylacetamide (DMA), methylene chloride (CH<sub>2</sub>Cl<sub>2</sub>), acetone and hexanes were purchased at the highest commercial quality and used without further purification, unless otherwise stated. Reagents were purchased at the highest commercial quality and used without further purification, unless otherwise stated. Yields refer to chromatographically and spectroscopically (<sup>1</sup>H NMR) homogeneous materials, unless otherwise stated. Reactions were monitored by thin-layer chromatography (TLC) carried out on 0.25 mm E. Merck silica gel plates (60F-254) using UV light as visualizing agent and an ethanolic solution of ammonium molybdate, anisaldehyde, and heat as developing agents. E. Merck silica gel (60, particle size 0.040–0.063 mm) was used for flash column chromatography. NMR spectra were recorded on a Bruker AV-400 instrument and calibrated using residual undeuterated solvent as an internal reference. The following abbreviations were used to explain the multiplicities: s = singlet, d = doublet, t = triplet, q = quartet, quint = quintet, m = multiplet, br = broad. IR spectra were recorded on a Perkin-Elmer Spectrum One FTIR spectrometer with diamond ATR accessory. Melting points (m.p.) are uncorrected, and recorded on a Buchi

B-540 melting point apparatus. High-resolution mass spectra (HRMS) were recorded on an Agilent ESI TOF (time of flight) mass spectrometer at 3500 V emitter voltage.

## II) General Experimental Procedures and Characterization data

### General procedure for the synthesis of 3-substituted indoles **2a–t** through hypervalent iodine-mediated alkene difunctionalization of *o*-vinylphenols **1**:

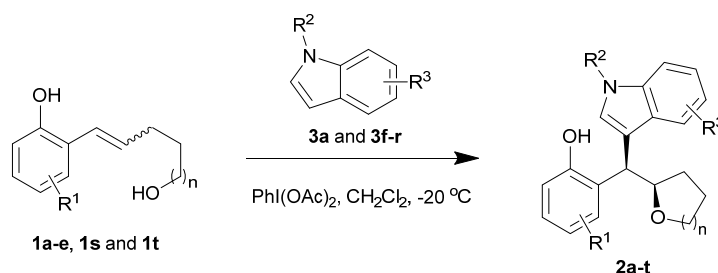

To a stirred solution of *o*-vinylphenols **1** (0.2 mmol) and indoles **3** (0.24 mmol) in  $\text{CH}_2\text{Cl}_2$  (10 mL) at  $-20\text{ }^\circ\text{C}$  was treated with  $\text{PhI(OAc)}_2$  (0.24 mmol). The resulting mixture was stirred for 1 h before it was quenched with saturated  $\text{Na}_2\text{S}_2\text{O}_3$  (sat. aq., 10 mL). The layers were separated, and the aqueous layer was extracted with  $\text{CH}_2\text{Cl}_2$  ( $3 \times 5$  mL). The combined organic layers were dried ( $\text{Na}_2\text{SO}_4$ ) and concentrated *in vacuo*. Flash column chromatography (silica gel, hexanes:EtOAc 20:1) afforded corresponding products **2a–t**.

**Starting materials:** *o*-Vinylphenols **1a–e**, **1s** and **1t**,<sup>1</sup> indoles **3a** and **3f–r**<sup>2</sup> were prepared according to the known literature procedures.

**5-Butyl-1-methyl-1*H*-indole (3l):** white solid; m.p. 40–42  $^\circ\text{C}$ ; IR (film)  $\nu_{\text{max}}$  2919,

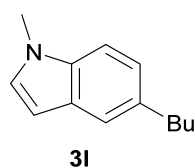

2594, 1560, 1110, 1006, 893, 741  $\text{cm}^{-1}$ ;  $^1\text{H NMR}$  (400 MHz,  $\text{CDCl}_3$ )

$\delta = 7.41$  (s, 1 H), 7.21 (d,  $J = 8.3$  Hz, 1 H), 7.05 (dd,  $J = 8.3, 1.2$  Hz,

1 H), 6.97 (d,  $J = 3.0$  Hz, 1 H), 6.40 (dd,  $J = 2.9, 0.6$  Hz, 1 H), 3.72

(s, 3 H), 2.76–2.61 (m, 2 H), 1.72–1.57 (m, 2 H), 1.37 (dq,  $J = 14.6, 7.3$  Hz, 2 H), 0.92 ppm (t,  $J = 7.3$  Hz, 3 H);  $^{13}\text{C}$  NMR (100 MHz,  $\text{CDCl}_3$ )  $\delta = 135.3, 133.7, 128.7, 128.6, 122.6, 119.9, 108.8, 100.4, 35.7, 34.5, 32.7, 22.4, 14.0$  ppm. HRMS (ESI): calcd for  $\text{C}_{13}\text{H}_{18}\text{N}^+$  [ $\text{M} + \text{H}^+$ ] 188.1434, found 188.1435.

**5-(2-Methoxyphenyl)-1-methyl-1H-indole (3q):** white solid; m.p. 117–119 °C; IR

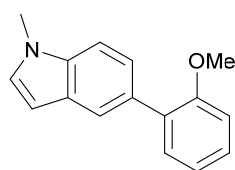

**3q**

(film)  $\nu_{\text{max}}$  2939, 2907, 1479, 1240, 1026, 886, 802, 748, 721  $\text{cm}^{-1}$ ;  $^1\text{H}$  NMR (400 MHz,  $\text{CDCl}_3$ )  $\delta = 7.84$  (s, 1 H), 7.53–7.44 (m, 2 H), 7.44–7.34 (m, 2 H), 7.16–7.09 (m, 2 H), 7.06 (d,  $J = 8.2$

Hz, 1 H), 6.59 (s, 1 H), 3.87 (s, 3 H), 3.85 ppm (s, 3 H);  $^{13}\text{C}$  NMR (100 MHz,  $\text{CDCl}_3$ )  $\delta = 156.6, 135.9, 132.0, 131.3, 129.7, 129.0, 128.4, 127.9, 123.6, 121.7, 120.7, 111.2, 108.5, 101.2, 55.5, 32.8$  ppm. HRMS (ESI): calcd for  $\text{C}_{16}\text{H}_{16}\text{NO}^+$  [ $\text{M} + \text{H}^+$ ] 238.1226, found 238.1228.

**5-(Furan-2-yl)-1-methyl-1H-indole (3r):** white solid; m.p. 70–72 °C; IR (film)  $\nu_{\text{max}}$

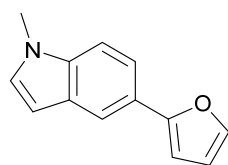

**3r**

2992, 2907, 1390, 1140, 1022, 986, 876, 738  $\text{cm}^{-1}$ ;  $^1\text{H}$  NMR (400 MHz,  $\text{CDCl}_3$ )  $\delta = 8.03$  (s, 1 H), 7.62 (dd,  $J = 8.6, 1.3$  Hz, 1 H), 7.51 (d,  $J = 0.9$  Hz, 1 H), 7.35 (d,  $J = 8.6$  Hz, 1 H), 7.08 (d,  $J =$

3.0 Hz, 1 H), 6.64 (d,  $J = 3.2$  Hz, 1 H), 6.56 (d,  $J = 3.0$  Hz, 1 H), 6.53 (dd,  $J = 3.1, 1.8$  Hz, 1 H), 3.79 ppm (s, 3 H).  $^{13}\text{C}$  NMR (100 MHz,  $\text{CDCl}_3$ )  $\delta = 155.5, 141.0, 136.2, 129.5, 128.6, 122.8, 118.4, 116.3, 111.5, 109.4, 102.9, 101.4, 32.8$  ppm. HRMS (ESI): calcd for  $\text{C}_{13}\text{H}_{12}\text{NO}^+$  [ $\text{M} + \text{H}^+$ ] 198.0913, found 198.0913.

**2-((5,5-Dimethyltetrahydrofuran-2-yl)(1-methyl-1H-indol-3-yl)methyl)phenol**

**(2a):** obtained in 84% yield and >20:1 dr as a white solid; m.p. 112–114 °C; IR (film)

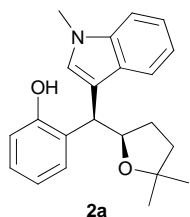

$\nu_{\max}$  3232, 3052, 2970, 1612, 1481, 1372, 1232, 1131, 1015, 884, 741  $\text{cm}^{-1}$ ;  $^1\text{H}$  NMR (400 MHz,  $\text{CDCl}_3$ )  $\delta$  = 8.84 (s, 1 H), 7.27 (d,  $J$  = 8.2 Hz, 1 H), 7.23 (d,  $J$  = 7.8 Hz, 1 H), 7.18 (t,  $J$  = 7.5 Hz, 1 H), 7.09 (t,  $J$  = 7.6 Hz, 1 H), 7.03 (s, 1 H), 6.97 (t,  $J$  = 7.5 Hz, 2 H), 6.84 (d,  $J$  = 7.6 Hz, 1 H), 6.67 (t,  $J$  = 7.4 Hz, 1 H), 4.93 (s, 1 H), 4.82 (td,  $J$  = 7.1, 2.3 Hz, 1 H), 3.78 (s, 3 H), 2.16 (dt,  $J$  = 13.8, 6.9 Hz, 1 H), 1.96–1.85 (m, 1 H), 1.74–1.63 (m, 1 H), 1.34–1.28 (m, 1 H), 1.27 (s, 3 H), 1.19 ppm (s, 3 H);  $^{13}\text{C}$  NMR (100 MHz,  $\text{CDCl}_3$ )  $\delta$  = 155.5, 136.7, 130.9, 127.9(2C), 127.8, 127.0, 121.7, 119.8, 119.6, 118.9, 117.8, 113.2, 108.9, 82.2(2C), 41.4, 38.4, 32.7, 28.2, 27.6, 27.2 ppm; HRMS (ESI): calcd for  $\text{C}_{22}\text{H}_{26}\text{NO}_2^+$  [ $\text{M} + \text{H}^+$ ] 336.1958, found 336.1963.

**2-((5,5-Dimethyltetrahydrofuran-2-yl)(1-methyl-1H-indol-3-yl)methyl)-4-methyl-**

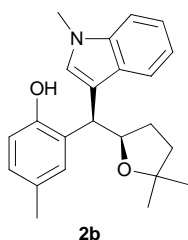

**phenol (2b):** obtained in 82% yield and >20:1 dr as a white solid; m.p. 110–112 °C; IR (film)  $\nu_{\max}$  3235, 2969, 2925, 1614, 1492, 1371, 1229, 1130, 1016, 881, 819, 737  $\text{cm}^{-1}$ ;  $^1\text{H}$  NMR (400 MHz,  $\text{CDCl}_3$ )  $\delta$  = 8.69 (s, 1 H), 7.28 (d,  $J$  = 8.0 Hz, 1 H), 7.23 (d,  $J$  = 10.0 Hz, 1 H), 7.15 (t,  $J$  = 7.4 Hz, 1 H), 7.04 (s, 1 H), 6.97 (t,  $J$  = 7.4 Hz, 1 H), 6.85 (dt,  $J$  = 14.0, 4.9 Hz, 2 H), 6.65 (s, 1 H), 4.82 (d,  $J$  = 2.3 Hz, 1 H), 4.74 (td,  $J$  = 7.3, 2.6 Hz, 1 H), 3.76 (s, 3 H), 2.11 (dd,  $J$  = 13.7, 6.2 Hz, 1 H), 2.05 (s, 3 H), 1.87 (ddd,  $J$  = 16.1, 12.5, 7.5 Hz, 1 H), 1.66 (dt,  $J$  = 12.2, 7.8 Hz, 1 H), 1.37–1.27 (m, 1 H), 1.23 (s, 3 H), 1.14 ppm (s, 3 H);  $^{13}\text{C}$  NMR (100 MHz,  $\text{CDCl}_3$ )  $\delta$  = 153.1, 136.7, 131.3, 128.8, 128.5, 128.0, 127.8, 127.2, 121.7, 119.6, 118.9, 117.8, 113.2, 109.0, 82.4, 82.3, 41.8, 38.5, 32.8, 28.5, 27.8, 27.4, 20.6 ppm; HRMS (ESI): calcd for  $\text{C}_{23}\text{H}_{28}\text{NO}_2^+$  [ $\text{M} + \text{H}^+$ ] 350.2115, found 350.2112.

**2-((5,5-Dimethyltetrahydrofuran-2-yl)(1-methyl-1*H*-indol-3-yl)methyl)-4-fluoro-**

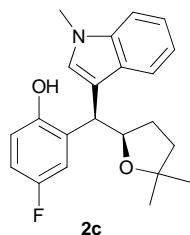

**phenol (2c):** obtained in 83% yield and >20:1 dr as a colorless oil; IR

(film)  $\nu_{\max}$  3231, 2969, 2928, 1615, 1486, 1373, 1237, 1134, 1017,

879, 821, 741  $\text{cm}^{-1}$ ;  $^1\text{H}$  NMR (400 MHz,  $\text{CDCl}_3$ )  $\delta$  = 8.60 (s, 1 H),

7.33–7.28 (m, 1 H), 7.22 (d,  $J$  = 7.6 Hz, 2 H), 7.04–6.97 (m, 2 H), 6.91 (dd,  $J$  = 8.8,

5.0 Hz, 1 H), 6.78 (td,  $J$  = 8.3, 3.1 Hz, 1 H), 6.53 (dd,  $J$  = 9.9, 3.1 Hz, 1 H), 4.98 (d,  $J$

= 2.5 Hz, 1 H), 4.82 (td,  $J$  = 7.2, 2.8 Hz, 1 H), 3.82 (s, 3 H), 2.20 (dt,  $J$  = 14.7, 6.9 Hz,

1 H), 1.97–1.85 (m, 1 H), 1.78–1.66 (m, 1 H), 1.37–1.29 (m, 1 H), 1.27 (s, 3 H), 1.19

ppm (s, 3 H);  $^{13}\text{C}$  NMR (100 MHz,  $\text{CDCl}_3$ )  $\delta$  = 157.9, 155.6, 151.6 (d,  $J_{\text{C-F}}$  = 2.0 Hz),

136.8, 129.5 (d,  $J_{\text{C-F}}$  = 6.5 Hz), 127.5, 126.8, 122.0, 119.3 (d,  $J_{\text{C-F}}$  = 38.5 Hz), 118.7 (d,

$J_{\text{C-F}}$  = 8.0 Hz), 116.9 (d,  $J_{\text{C-F}}$  = 23.6 Hz), 114.2 (d,  $J_{\text{C-F}}$  = 22.7 Hz), 112.6, 109.1, 82.3,

82.1, 40.7, 38.5, 32.8, 27.9, 27.6, 27.1 ppm; HRMS (ESI): calcd for  $\text{C}_{22}\text{H}_{25}\text{FNO}_2^+$  [ $\text{M}$

+  $\text{H}^+$ ] 354.1864, found 354.1868.

**4-Chloro-2-((5,5-dimethyltetrahydrofuran-2-yl)(1-methyl-1*H*-indol-3-yl)methyl)-**

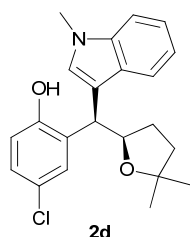

**phenol (2d):** obtained in 86% yield and >20:1 dr as a white solid;

m.p. 107–109 °C; IR (film)  $\nu_{\max}$  3214, 2970, 2927, 1744, 1613, 1477,

1372, 1264, 1230, 1130, 1017, 881, 822, 740  $\text{cm}^{-1}$ ;  $^1\text{H}$  NMR (400

MHz,  $\text{CDCl}_3$ )  $\delta$  = 8.89 (s, 1 H), 7.30 (d,  $J$  = 8.2 Hz, 1 H), 7.24 (d,  $J$  = 5.1 Hz, 1 H),

7.20 (d,  $J$  = 7.5 Hz, 2 H), 7.04 (dt,  $J$  = 14.6, 5.6 Hz, 2 H), 6.90 (d,  $J$  = 8.5 Hz, 1 H),

6.81 (d,  $J$  = 2.5 Hz, 1 H), 4.92 (d,  $J$  = 2.4 Hz, 1 H), 4.78 (td,  $J$  = 7.3, 2.6 Hz, 1 H),

3.81 (s, 3 H), 2.19 (dd,  $J$  = 13.1, 6.8 Hz, 1 H), 1.96–1.82 (m, 1 H), 1.81–1.67 (m, 1 H),

1.42–1.31 (m, 1 H), 1.27 (s, 3 H), 1.19 ppm (s, 3 H);  $^{13}\text{C}$  NMR (100 MHz,  $\text{CDCl}_3$ )  $\delta$  =

154.3, 136.8, 130.3, 129.8, 127.8, 127.6, 127.0, 124.7, 122.0, 119.3(2C), 119.2, 112.3, 109.1, 82.3, 82.2, 41.0, 38.5, 32.8, 28.1, 27.6, 27.2 ppm; HRMS (ESI): calcd for  $C_{22}H_{25}ClNO_2^+$  [ $M + H^+$ ] 370.1568, found 370.1593.

**2-((5,5-Dimethyltetrahydrofuran-2-yl)(1-methyl-1*H*-indol-3-yl)methyl)-4-Methoxyphenol (2e):**

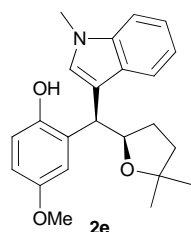

obtained in 71% yield and >20:1 dr as a white solid;

m.p. 96–98 °C; IR (film)  $\nu_{max}$  3229, 3033, 2970, 1612, 1481, 1370,

1132, 1031, 862, 740  $cm^{-1}$ ;  $^1H$  NMR (400 MHz,  $CDCl_3$ )  $\delta$  = 8.40 (s,

1 H), 7.28–7.25 (m, 2 H), 7.18 (t,  $J$  = 7.2 Hz, 1 H), 7.02 (s, 1 H), 6.99 (dd,  $J$  = 11.4,

4.4 Hz, 1 H), 6.90 (d,  $J$  = 8.7 Hz, 1 H), 6.65 (dd,  $J$  = 8.7, 3.1 Hz, 1 H), 6.43 (d,  $J$  = 3.1

Hz, 1 H), 4.93 (d,  $J$  = 2.6 Hz, 1 H), 4.80 (td,  $J$  = 7.2, 2.8 Hz, 1 H), 3.80 (s, 3 H), 3.58

(s, 3 H), 2.17 (dt,  $J$  = 14.6, 6.8 Hz, 1 H), 1.93 (ddd,  $J$  = 16.1, 10.6, 7.3 Hz, 1 H), 1.75–

1.64 (m, 1 H), 1.36–1.28 (m, 1 H), 1.26 (s, 3 H), 1.18 ppm (s, 3 H);  $^{13}C$  NMR (100

MHz,  $CDCl_3$ )  $\delta$  = 153.0, 149.5, 136.8, 129.1, 127.8, 127.0, 121.8, 119.6, 119.0, 118.2,

117.2, 113.0, 112.0, 108.9, 82.4, 82.1, 55.5, 41.1, 38.5, 32.8, 28.2, 27.7, 27.2 ppm;

HRMS (ESI): calcd for  $C_{23}H_{28}NO_3^+$  [ $M + H^+$ ] 366.2064, found 366.2067.

**2-((1-Butyl-1*H*-indol-3-yl)(5,5-dimethyltetrahydrofuran-2-yl)methyl)phenol (2f):**

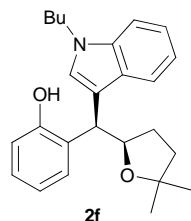

obtained in 80% yield and >20:1 dr as a colorless oil; IR (film)  $\nu_{max}$

3256, 3049, 2965, 1738, 1612, 1465, 1369, 1272, 1234, 1134, 1016,

884, 744  $cm^{-1}$ ;  $^1H$  NMR (400 MHz,  $CDCl_3$ )  $\delta$  = 8.89 (s, 1 H), 7.30 (d,

$J$  = 8.2 Hz, 1 H), 7.24 (d,  $J$  = 8.8 Hz, 1 H), 7.15 (dd,  $J$  = 11.2, 4.0 Hz, 1 H), 7.11–7.08

(m, 2 H), 7.01–6.92 (m, 2 H), 6.83 (dd,  $J$  = 7.5, 1.3 Hz, 1 H), 6.73–6.60 (m, 1 H), 4.92

(d,  $J$  = 2.0 Hz, 1 H), 4.82 (td,  $J$  = 7.2, 2.5 Hz, 1 H), 4.11 (dd,  $J$  = 7.1, 5.6 Hz, 2 H),

2.17 (dt,  $J = 13.3, 7.3$  Hz, 1 H), 1.98–1.88 (m, 1 H), 1.86–1.81 (m, 2 H), 1.74–1.63 (m, 1 H), 1.42–1.31 (m, 3 H), 1.27 (s, 3 H), 1.19 (s, 3 H), 0.96 ppm (t,  $J = 7.4$  Hz, 3 H);  $^{13}\text{C}$  NMR (100 MHz,  $\text{CDCl}_3$ )  $\delta = 155.5, 136.0, 130.9, 128.0(2\text{C}), 127.9, 126.0, 121.5, 119.9, 119.7, 118.8, 117.9, 113.0, 109.2, 82.3, 82.2, 46.1, 41.4, 38.5, 32.4, 28.3, 27.7, 27.2, 20.2, 13.7$  ppm; HRMS (ESI): calcd for  $\text{C}_{25}\text{H}_{32}\text{NO}_2^+$  [ $\text{M} + \text{H}^+$ ] 378.2428, found 378.2428.

**2-((1-(Cyclopropylmethyl)-1*H*-indol-3-yl)(5,5-dimethyltetrahydrofuran-2-yl)methyl)phenol (2g)**

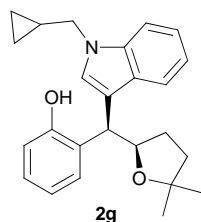

**hyl)phenol (2g):** obtained in 78% yield and >20:1 dr as a white solid; m.p. 121–123 °C; IR (film)  $\nu_{\text{max}}$  3228, 3012, 2969, 1592, 1380, 1372, 1269, 1131, 1015, 854, 741  $\text{cm}^{-1}$ ;  $^1\text{H}$  NMR (400 MHz,  $\text{CDCl}_3$ )

$\delta = 8.89$  (s, 1 H), 7.32 (d,  $J = 8.2$  Hz, 1 H), 7.27–7.22 (m, 1 H), 7.16 (t,  $J = 7.6$  Hz, 2 H), 7.13–7.06 (m, 1 H), 6.97 (t,  $J = 7.4$  Hz, 2 H), 6.84 (t,  $J = 8.3$  Hz, 1 H), 6.68 (t,  $J = 7.4$  Hz, 1 H), 4.92 (d,  $J = 2.0$  Hz, 1 H), 4.83 (td,  $J = 7.2, 2.5$  Hz, 1 H), 3.98 (ddd,  $J = 32.0, 14.3, 6.7$  Hz, 2 H), 2.16 (td,  $J = 13.7, 7.1$  Hz, 1 H), 1.98–1.85 (m, 1 H), 1.70 (dt,  $J = 12.3, 7.4$  Hz, 1 H), 1.38–1.28 (m, 2 H), 1.28 (s, 3 H), 1.19 (s, 3 H), 0.63 (d,  $J = 7.8$  Hz, 2 H), 0.38 ppm (d,  $J = 4.7$  Hz, 2 H);  $^{13}\text{C}$  NMR (100 MHz,  $\text{CDCl}_3$ )  $\delta = 155.5, 136.2, 130.9, 128.0, 127.9(2\text{C}), 125.8, 121.6, 119.9, 119.6, 118.9, 117.9, 113.1, 109.2, 82.3, 82.2, 50.6, 41.6, 38.5, 28.3, 27.7, 27.3, 11.4, 4.1, 4.0$  ppm; HRMS (ESI): calcd for  $\text{C}_{25}\text{H}_{30}\text{NO}_2^+$  [ $\text{M} + \text{H}^+$ ] 376.2271, found 376.2272.

**2-((1-Benzyl-1*H*-indol-3-yl)(5,5-dimethyltetrahydrofuran-2-yl)methyl)phenol (2h)**

**(2h):** obtained in 75% yield and >20:1 dr as a white solid; m.p. 58–60 °C; IR (film)  $\nu_{\text{max}}$  3201, 2970, 1492, 1431, 1372, 1139, 998, 804, 741  $\text{cm}^{-1}$ ;  $^1\text{H}$  NMR (400 MHz,



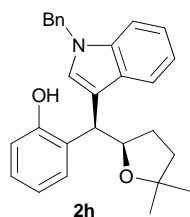

$\text{CDCl}_3$ )  $\delta$  = 8.88 (s, 1 H), 7.38–7.26 (m, 3 H), 7.25 (d,  $J$  = 10.1 Hz, 2 H), 7.18–7.07 (m, 5 H), 6.99 (t,  $J$  = 7.5 Hz, 2 H), 6.85 (dd,  $J$  = 7.6, 1.5 Hz, 1 H), 6.69 (td,  $J$  = 7.5, 1.2 Hz, 1 H), 5.43–5.30 (m, 2 H), 4.95 (d,  $J$  = 2.3 Hz, 1 H), 4.82 (td,  $J$  = 7.2, 2.6 Hz, 1 H), 2.13 (dt,  $J$  = 14.6, 6.8 Hz, 1 H), 1.95–1.80 (m, 1 H), 1.73–1.62 (m, 1 H), 1.29 (dd,  $J$  = 7.3, 4.9 Hz, 1 H), 1.26 (s, 3 H), 1.15 ppm (s, 3 H);  $^{13}\text{C}$  NMR (100 MHz,  $\text{CDCl}_3$ )  $\delta$  = 155.6, 137.7, 136.4, 130.8, 128.8(2C), 128.1, 127.9, 127.8, 127.6, 126.6(2C), 126.4, 122.0, 119.9, 119.8, 119.2, 118.0, 114.0, 109.5, 82.2(2C), 50.0, 41.4, 38.4, 28.2, 27.6, 27.2 ppm; HRMS (ESI): calcd for  $\text{C}_{28}\text{H}_{30}\text{NO}_2^+$  [ $\text{M} + \text{H}^+$ ] 412.2271, found 412.2276.

**2-((1,2-Dimethyl-1H-indol-3-yl)(5,5-dimethyltetrahydrofuran-2-yl)methyl)phenol**

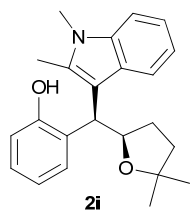

**(2i)**: obtained in 72% yield and >20:1 dr as a colorless oil; IR (film)  $\nu_{\text{max}}$  3232, 3052, 2970, 1612, 1481, 1372, 1232, 1131, 1015, 884, 741  $\text{cm}^{-1}$ ; IR (film)  $\nu_{\text{max}}$  3052, 2970, 2886, 1612, 1479, 1352, 1162, 1131, 1015, 894, 745  $\text{cm}^{-1}$ ;  $^1\text{H}$  NMR (400 MHz,  $\text{CDCl}_3$ )  $\delta$  = 8.69 (s, 1 H), 7.59 (d,  $J$  = 7.9 Hz, 1 H), 7.25 (t,  $J$  = 9.0 Hz, 1 H), 7.15 (dd,  $J$  = 9.0, 4.4 Hz, 2 H), 7.11–7.00 (m, 2 H), 6.89 (d,  $J$  = 7.5 Hz, 1 H), 6.70 (t,  $J$  = 7.2 Hz, 1 H), 4.79 (d,  $J$  = 1.9 Hz, 1 H), 4.76–4.69 (m, 1 H), 3.64 (s, 3 H), 2.30 (s, 3 H), 2.20 (dt,  $J$  = 12.4, 6.3 Hz, 1 H), 2.01–1.89 (m, 1 H), 1.71 (dt,  $J$  = 12.2, 7.8 Hz, 1 H), 1.60–1.46 (m, 1 H), 1.26 (s, 3 H), 1.16 ppm (s, 3 H);  $^{13}\text{C}$  NMR (100 MHz,  $\text{CDCl}_3$ )  $\delta$  = 155.0, 136.6, 134.9, 130.9, 127.8, 127.6(2C), 120.4, 119.7, 119.6, 118.9, 117.2, 110.1, 108.7, 82.4, 81.7, 42.1, 38.7, 29.9, 29.6, 27.9, 27.3, 11.1 ppm; HRMS (ESI): calcd for  $\text{C}_{23}\text{H}_{28}\text{NO}_2^+$  [ $\text{M} + \text{H}^+$ ] 350.2115, found 350.2113.

**2-((5,5-Dimethyltetrahydrofuran-2-yl)(1-methyl-2-phenyl-1*H*-indol-3-yl)methyl)-**

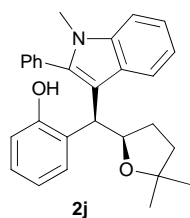

**phenol (2j):** obtained in 68% yield and >20:1 dr as a white solid; m.p.

120–122 °C; IR (film)  $\nu_{\max}$  3206, 3052, 2970, 1607, 1466, 1367,

1240, 1150, 1018, 885, 740  $\text{cm}^{-1}$ ;  $^1\text{H}$  NMR (400 MHz,  $\text{CDCl}_3$ )  $\delta$  =

8.74 (s, 1 H), 7.67 (d,  $J$  = 8.0 Hz, 1 H), 7.43 (s, 4 H), 7.35 (d,  $J$  = 8.2 Hz, 1 H), 7.23

(ddd,  $J$  = 9.6, 9.0, 4.1 Hz, 3 H), 7.16–7.01 (m, 2 H), 6.88 (dd,  $J$  = 8.0, 1.0 Hz, 1 H),

6.72–6.64 (m, 1 H), 4.78 (d,  $J$  = 2.1 Hz, 1 H), 4.67–4.46 (m, 1 H), 3.54 (s, 3 H), 1.88

(dt,  $J$  = 12.3, 5.4 Hz, 2 H), 1.68–1.57 (m, 1 H), 1.47 (ddd,  $J$  = 12.2, 8.9, 6.3 Hz, 1 H),

1.18 (s, 3 H), 1.15 ppm (s, 3 H);  $^{13}\text{C}$  NMR (100 MHz,  $\text{CDCl}_3$ )  $\delta$  = 155.1, 139.2, 137.3,

131.8, 131.0(2C), 130.8, 128.5, 128.4(2C), 127.7, 127.6, 127.2, 121.6, 121.2, 119.6,

119.4, 117.2, 112.4, 109.4, 83.0, 81.4, 42.2, 38.9, 30.9, 29.5, 27.7, 26.9 ppm; HRMS

(ESI): calcd for  $\text{C}_{28}\text{H}_{30}\text{NO}_2^+$  [ $\text{M} + \text{H}^+$ ] 412.2271, found 412.2276.

**2-((1,4-Dimethyl-1*H*-indol-3-yl)(5,5-dimethyltetrahydrofuran-2-yl)methyl)phenol**

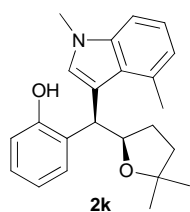

**(2k):** obtained in 79% yield and >20:1 dr as a white solid; m.p. 120–

125 °C; IR (film)  $\nu_{\max}$  3212, 3022, 2890, 1609, 1521, 1286, 1097,

1015, 885, 738  $\text{cm}^{-1}$ ;  $^1\text{H}$  NMR (400 MHz,  $\text{CDCl}_3$ )  $\delta$  = 8.71 (s, 1 H),

7.12 (t,  $J$  = 6.4 Hz, 1 H), 7.07 (dd,  $J$  = 14.0, 7.7 Hz, 2 H), 6.97 (d,  $J$  = 8.0 Hz, 1 H),

6.88 (s, 1 H), 6.71 (d,  $J$  = 7.0 Hz, 1 H), 6.67 (d,  $J$  = 4.3 Hz, 2 H), 5.32 (s, 1 H), 4.89

(td,  $J$  = 7.0, 2.0 Hz, 1 H), 3.79 (s, 3 H), 2.25 (dd,  $J$  = 13.9, 6.3 Hz, 1 H), 2.20 (s, 3 H),

1.94 (ddt,  $J$  = 12.3, 8.9, 6.1 Hz, 1 H), 1.79–1.64 (m, 1 H), 1.29 (d,  $J$  = 16.7 Hz, 1 H),

1.27 (s, 3 H), 1.25 ppm (s, 3 H);  $^{13}\text{C}$  NMR (100 MHz,  $\text{CDCl}_3$ )  $\delta$  = 155.2, 137.4, 131.8,

131.0, 128.9, 127.7, 126.7, 126.0, 121.9, 121.0, 120.1, 117.7, 114.4, 106.8, 82.7, 81.6,

41.3, 38.5, 32.9, 28.0, 27.4, 26.6, 19.5 ppm; HRMS (ESI): calcd for  $C_{23}H_{28}NO_2^+$  [ $M + H^+$ ] 350.2115, found 350.2120.

**2-((5-Butyl-1-methyl-1*H*-indol-3-yl)(5,5-dimethyltetrahydrofuran-2-yl)methyl)-p**

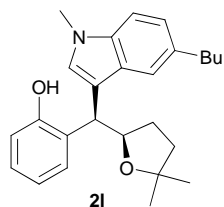

**henol (2l)**: obtained in 81% yield and >20:1 dr as a white solid; m.p. 180–182 °C; IR (film)  $\nu_{\max}$  3256, 2964, 2927, 1582, 1487, 1375, 1232, 1148, 1106, 873, 755  $cm^{-1}$ ;  $^1H$  NMR (400 MHz,  $CDCl_3$ )  $\delta$  = 8.88 (s, 1 H), 7.20 (d,  $J$  = 8.1 Hz, 1 H), 7.10 (t,  $J$  = 7.3 Hz, 1 H), 7.00 (dd,  $J$  = 17.3, 10.2 Hz, 4 H), 6.87 (d,  $J$  = 7.4 Hz, 1 H), 6.68 (t,  $J$  = 7.1 Hz, 1 H), 4.93 (s, 1 H), 4.81 (s, 1 H), 3.77 (s, 3 H), 2.59 (t,  $J$  = 7.4 Hz, 2 H), 2.17 (dd,  $J$  = 12.4, 6.6 Hz, 1 H), 2.01–1.82 (m, 1 H), 1.79–1.64 (m, 1 H), 1.54 (dd,  $J$  = 15.6, 8.2 Hz, 3 H), 1.33 (d,  $J$  = 15.1 Hz, 1 H), 1.28 (brs, 4 H), 1.20 (s, 3 H), 0.87 ppm (t,  $J$  = 7.2 Hz, 3 H);  $^{13}C$  NMR (100 MHz,  $CDCl_3$ )  $\delta$  = 155.5, 135.3, 133.5, 130.9, 127.9(2C), 127.8, 127.1, 122.8, 120.0, 118.8, 117.9, 112.7, 108.6, 82.4, 82.2, 41.2, 38.5, 35.7, 34.5, 32.8, 28.2, 27.7, 27.2, 22.3, 13.9 ppm; HRMS (ESI): calcd for  $C_{26}H_{34}NO_2^+$  [ $M + H^+$ ] 392.2584, found 392.2586.

**2-((5-Chloro-1-methyl-1*H*-indol-3-yl)(5,5-dimethyltetrahydrofuran-2-yl)methyl)-**

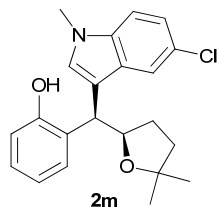

**phenol (2m)**: obtained in 76% yield and >20:1 dr as a white solid; m.p. 152–154 °C; IR (film)  $\nu_{\max}$  3262, 2969, 2924, 1583, 1480, 1373, 1267, 1144, 1043, 865, 754  $cm^{-1}$ ;  $^1H$  NMR (400 MHz,  $CDCl_3$ )  $\delta$  = 8.84 (s, 1 H), 7.23 (s, 1 H), 7.18 (d,  $J$  = 8.6 Hz, 1 H), 7.15–7.07 (m, 3 H), 6.97 (d,  $J$  = 8.0 Hz, 1 H), 6.83 (d,  $J$  = 7.4 Hz, 1 H), 6.70 (t,  $J$  = 7.4 Hz, 1 H), 4.80 (s, 1 H), 4.77 (dd,  $J$  = 12.0, 4.9 Hz, 1 H), 3.78 (s, 3 H), 2.15 (dt,  $J$  = 12.9, 6.8 Hz, 1 H),

1.87 (dt,  $J = 15.8, 7.5$  Hz, 1 H), 1.76–1.66 (m, 1 H), 1.37–1.29 (m, 1 H), 1.27 (s, 3 H), 1.18 ppm (s, 3 H);  $^{13}\text{C}$  NMR (100 MHz,  $\text{CDCl}_3$ )  $\delta = 155.4, 135.1, 130.7, 128.9, 128.4, 128.1, 127.7, 125.0, 122.1, 120.0, 118.9, 118.1, 112.9, 110.1, 82.4, 82.1, 41.6, 38.4, 33.0, 28.4, 27.8, 27.3$  ppm; HRMS (ESI): calcd for  $\text{C}_{22}\text{H}_{25}\text{ClNO}_2^+$  [ $\text{M} + \text{H}^+$ ] 370.1568, found 370.1566.

**2-((5-Bromo-1-methyl-1*H*-indol-3-yl)(5,5-dimethyltetrahydrofuran-2-yl)methyl)-**

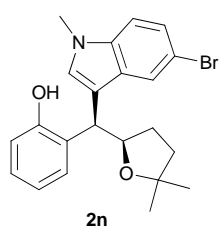

**phenol (2n):** obtained in 73% yield and >20:1 dr as a white solid;

m.p. 168–170 °C; IR (film)  $\nu_{\text{max}}$  3220, 2970, 1583, 1373, 1266,

1232, 1145, 1042, 887, 821, 755  $\text{cm}^{-1}$ ;  $^1\text{H}$  NMR (400 MHz,  $\text{CDCl}_3$ )

$\delta = 8.86$  (s, 1 H), 7.40 (s, 1 H), 7.25 (d,  $J = 7.7$  Hz, 1 H), 7.18–7.03 (m, 3 H), 6.97 (d,  $J = 7.9$  Hz, 1 H), 6.84 (d,  $J = 7.5$  Hz, 1 H), 6.70 (t,  $J = 7.4$  Hz, 1 H), 4.80 (s, 1 H), 4.77 (t,  $J = 7.3$  Hz, 1 H), 3.77 (s, 3 H), 2.15 (td,  $J = 13.4, 6.8$  Hz, 1 H), 1.87 (dt,  $J = 15.8, 7.7$  Hz, 1 H), 1.77–1.64 (m, 1 H), 1.40–1.29 (m, 1 H), 1.28 (s, 3 H), 1.19 ppm (s, 3 H);  $^{13}\text{C}$  NMR (100 MHz,  $\text{CDCl}_3$ )  $\delta = 155.4, 135.3, 130.7, 129.6, 128.3, 128.1, 127.7, 124.6, 121.9, 120.0, 118.1, 112.9, 112.5, 110.5, 82.4, 82.1, 41.6, 38.4, 33.0, 28.4, 27.8, 27.3$  ppm; HRMS (ESI): calcd for  $\text{C}_{22}\text{H}_{25}\text{BrNO}_2^+$  [ $\text{M} + \text{H}^+$ ] 414.1063, found 414.1068.

**2-((5,5-Dimethyltetrahydrofuran-2-yl)(5-methoxy-1-methyl-1*H*-indol-3-yl)methyl)-**

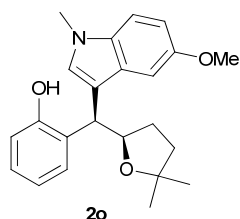

**yl)phenol (2o):** obtained in 65% yield and 13:1 dr as a white

solid; m.p. 125–127 °C; IR (film)  $\nu_{\text{max}}$  3256, 2968, 2925, 1580,

1489, 1372, 1271, 1224, 1038, 869, 756  $\text{cm}^{-1}$ ;  $^1\text{H}$  NMR (400

MHz,  $\text{CDCl}_3$ )  $\delta = 8.82$  (s, 1 H), 7.16 (d,  $J = 8.8$  Hz, 1 H), 7.09 (t,  $J = 7.5$  Hz, 1 H),

7.03–6.94 (m, 2 H), 6.84 (dd,  $J = 11.5, 4.8$  Hz, 2 H), 6.69 (t,  $J = 7.2$  Hz, 1 H), 6.63 (d,  $J = 1.9$  Hz, 1 H), 4.87 (s, 1 H), 4.85–4.75 (m, 1 H), 3.77 (s, 3 H), 3.68 (s, 3 H), 2.16 (dt,  $J = 19.4, 7.0$  Hz, 1 H), 2.00–1.86 (m, 1 H), 1.77–1.64 (m, 1 H), 1.38–1.28 (m, 1 H), 1.27 (s, 3 H), 1.19 ppm (s, 3 H);  $^{13}\text{C}$  NMR (100 MHz,  $\text{CDCl}_3$ )  $\delta = 155.6, 153.7, 132.2, 130.8, 128.1, 127.9, 127.7, 127.6, 119.90, 117.9, 112.7, 112.1, 109.7, 101.5, 82.3, 82.2, 55.9, 41.3, 38.5, 33.0, 28.2, 27.7, 27.2$  ppm; HRMS (ESI): calcd for  $\text{C}_{23}\text{H}_{28}\text{NO}_3^+$  [ $\text{M} + \text{H}^+$ ] 366.2064, found 366.2060.

**2-((5-(Benzyloxy)-1-methyl-1*H*-indol-3-yl)(5,5-dimethyltetrahydrofuran-2-yl)methyl)phenol (2p):** obtained in 63% yield and 15:1 dr as a white

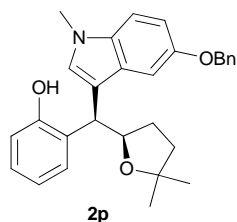

solid; m.p. 161–163 °C; IR (film)  $\nu_{\text{max}}$  3205, 3035, 2970, 1611, 1498, 1372, 1262, 1016, 883, 821, 735, 698  $\text{cm}^{-1}$ ;  $^1\text{H}$  NMR (400

MHz,  $\text{CDCl}_3$ )  $\delta = 9.03$  (s, 1 H), 7.27–7.15 (m, 3 H), 7.12 (d,  $J = 6.5$  Hz, 2 H), 7.02–6.90 (m, 3 H), 6.84–6.74 (m, 3 H), 6.60 (dd,  $J = 10.6, 4.2$  Hz, 1 H), 6.34 (d,  $J = 7.7$  Hz, 1 H), 5.37 (d,  $J = 2.0$  Hz, 1 H), 4.99 (q,  $J = 12.4$  Hz, 2 H), 4.62 (td,  $J = 7.6, 2.2$  Hz, 1 H), 3.64 (s, 3 H), 1.97 (dt,  $J = 12.8, 6.4$  Hz, 1 H), 1.90–1.78 (m, 1 H), 1.58 (dt,  $J = 12.2, 7.6$  Hz, 1 H), 1.25 (ddd,  $J = 12.3, 8.9, 6.0$  Hz, 1 H), 1.18 (s, 3 H), 1.10 ppm (s, 3 H);  $^{13}\text{C}$  NMR (100 MHz,  $\text{CDCl}_3$ )  $\delta = 155.3, 153.7, 138.2, 137.4, 131.2, 130.0, 128.4(2\text{C}), 127.5, 127.4, 127.2(2\text{C}), 126.4, 122.2, 119.5, 117.8, 117.7, 113.5, 102.5, 100.8, 82.3, 82.1, 69.7, 42.8, 38.4, 33.0, 28.9, 27.9, 27.4$  ppm; HRMS (ESI): calcd for  $\text{C}_{29}\text{H}_{32}\text{NO}_3^+$  [ $\text{M} + \text{H}^+$ ] 442.2377, found 442.2372.

**2-((5,5-Dimethyltetrahydrofuran-2-yl)(5-(2-methoxyphenyl)-1-methyl-1*H*-indol-3-yl)methyl)phenol (2q):** obtained in 75% yield and >20:1 dr as a white solid; m.p.

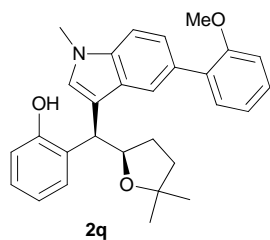

175–177 °C; IR (film)  $\nu_{\max}$  3312, 3092, 2988, 1612, 1481, 1472, 1198, 1131, 1015, 834, 728  $\text{cm}^{-1}$ ;  $^1\text{H}$  NMR (400 MHz,  $\text{CDCl}_3$ )  $\delta$  = 8.89 (s, 1 H), 7.43–7.36 (m, 2 H), 7.30 (d,  $J$  = 9.0 Hz, 1 H), 7.28–7.20 (m, 2 H), 7.13–7.03 (m, 2 H), 7.01–6.84 (m, 4 H), 6.70 (dd,  $J$  = 10.6, 4.2 Hz, 1 H), 4.93 (d,  $J$  = 1.6 Hz, 1 H), 4.81 (td,  $J$  = 7.3, 2.5 Hz, 1 H), 3.80 (s, 3 H), 3.69 (s, 3 H), 2.17 (dq,  $J$  = 14.2, 6.9 Hz, 1 H), 2.03–1.88 (m, 1 H), 1.70 (dt,  $J$  = 12.3, 7.4 Hz, 1 H), 1.39–1.28 (m, 1 H), 1.27 (s, 3 H), 1.20 ppm (s, 3 H);  $^{13}\text{C}$  NMR (100 MHz,  $\text{CDCl}_3$ )  $\delta$  = 156.5, 155.5, 136.0, 131.8, 131.2, 131.0, 129.3, 128.0, 127.8, 127.8, 127.7, 127.4, 123.9, 120.7, 120.53, 119.9, 117.9, 113.5, 111.1, 108.4, 82.4, 82.2, 55.4, 41.5, 38.5, 32.8, 28.3, 27.7, 27.2 ppm; HRMS (ESI): calcd for  $\text{C}_{29}\text{H}_{32}\text{NO}_3^+$   $[\text{M} + \text{H}^+]$  442.2377, found 442.2381.

**2-((5,5-Dimethyltetrahydrofuran-2-yl)(5-(furan-2-yl)-1-methyl-1H-indol-3-yl)methyl)phenol (2r):** obtained in 70% yield and >20:1 dr as a white

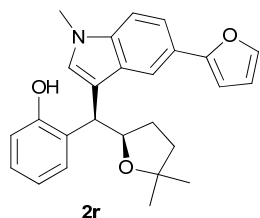

solid; m.p. 134–136 °C; IR (film)  $\nu_{\max}$  3052, 2970, 2876, 1512, 1381, 1372, 1273, 1131, 1015, 984, 785, 741  $\text{cm}^{-1}$ ;  $^1\text{H}$  NMR (400 MHz,  $\text{CDCl}_3$ )  $\delta$  = 8.99 (s, 1 H), 7.59 (s, 1 H), 7.53 (d,  $J$  = 8.5 Hz, 1 H), 7.40 (s, 1 H), 7.28 (s, 1 H), 7.15–7.07 (m, 2 H), 6.98 (d,  $J$  = 7.9 Hz, 1 H), 6.91 (d,  $J$  = 7.5 Hz, 1 H), 6.69 (t,  $J$  = 7.3 Hz, 1 H), 6.47 (d,  $J$  = 3.1 Hz, 1 H), 6.44–6.39 (m, 1 H), 4.92 (s, 1 H), 4.79 (td,  $J$  = 7.4, 2.3 Hz, 1 H), 3.80 (s, 3 H), 2.17 (td,  $J$  = 13.0, 6.8 Hz, 1 H), 1.99–1.84 (m, 1 H), 1.70 (dt,  $J$  = 12.2, 7.5 Hz, 1 H), 1.39–1.31 (m, 1 H), 1.29 (s, 3 H), 1.20 ppm (s, 3 H);  $^{13}\text{C}$  NMR (100 MHz,  $\text{CDCl}_3$ )  $\delta$  = 155.5, 155.4, 141.1, 136.2, 130.9, 128.1, 128.0(2C), 127.9, 122.7, 119.9, 118.7, 118.1, 115.0, 113.7, 111.4, 109.3, 103.1,

82.4, 82.3, 41.7, 38.5, 32.9, 28.5, 27.8, 27.3 ppm; HRMS (ESI): calcd for  $C_{26}H_{28}NO_3^+$  [M + H<sup>+</sup>] 402.2064, found 402.2070.

**2-((1-Methyl-1*H*-indol-3-yl)(tetrahydrofuran-2-yl)methyl)phenol (2s):** obtained in

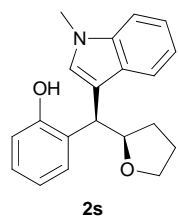

81% yield and >20:1 dr as a white solid; m.p. 139–141 °C; IR (film)

$\nu_{\max}$  3205, 3035, 2970, 1611, 1498, 1262, 1016, 883, 735, 698  $cm^{-1}$ ;

$^1H$  NMR (400 MHz,  $CDCl_3$ )  $\delta$  = 8.77 (s, 1 H), 7.26 (dd,  $J$  = 13.6, 7.8

Hz, 2 H), 7.18 (t,  $J$  = 7.5 Hz, 1 H), 7.09 (t,  $J$  = 7.5 Hz, 1 H), 7.03 (s, 1 H), 6.97 (dd,  $J$

= 17.1, 8.0 Hz, 2 H), 6.86 (d,  $J$  = 7.6 Hz, 1 H), 6.68 (t,  $J$  = 7.4 Hz, 1 H), 4.95 (d,  $J$  =

1.5 Hz, 1 H), 4.73 (td,  $J$  = 7.1, 2.8 Hz, 1 H), 3.85 (dd,  $J$  = 13.6, 7.5 Hz, 1 H), 3.78 (s, 3

H), 3.75 (d,  $J$  = 7.9 Hz, 1 H), 2.18–2.03 (m, 1 H), 1.83 (tt,  $J$  = 14.6, 7.2 Hz, 2 H),

1.58–1.46 ppm (m, 1 H);  $^{13}C$  NMR (100 MHz,  $CDCl_3$ )  $\delta$  = 155.4, 136.8, 130.9, 127.9,

127.7, 127.6, 127.0, 121.8, 119.9, 119.6, 119.0, 117.6, 113.1, 109.0, 83.2, 68.4, 41.7,

32.8, 28.0, 26.2 ppm; HRMS (ESI): calcd for  $C_{20}H_{22}NO_2^+$  [M + H<sup>+</sup>] 308.1645, found

308.1648.

**2-((1-Methyl-1*H*-indol-3-yl)(tetrahydro-2*H*-pyran-2-yl)methyl)phenol (2t):**

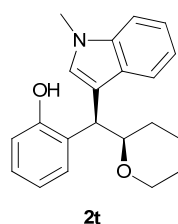

obtained in 77% yield and >20:1 dr as a white solid; m.p. 124–126 °C;

IR (film)  $\nu_{\max}$  3232, 3052, 2970, 1612, 1481, 1332, 1231, 1115, 884,

741  $cm^{-1}$ ;  $^1H$  NMR (400 MHz,  $CDCl_3$ )  $\delta$  = 9.11 (s, 1 H), 7.36 (d,  $J$  =

7.9 Hz, 1 H), 7.24 (t,  $J$  = 10.9 Hz, 2 H), 7.16 (t,  $J$  = 7.5 Hz, 1 H), 7.08 (t,  $J$  = 7.4 Hz, 1

H), 7.01 (t,  $J$  = 7.5 Hz, 2 H), 6.89 (d,  $J$  = 7.8 Hz, 1 H), 6.71 (t,  $J$  = 7.3 Hz, 1 H), 4.47

(s, 1 H), 4.14 (dd,  $J$  = 31.5, 9.8 Hz, 2 H), 3.76 (s, 3 H), 3.66–3.54 (m, 1 H), 1.86–1.65

(m, 2 H), 1.54–1.46 ppm (m, 4 H);  $^{13}C$  NMR (100 MHz,  $CDCl_3$ )  $\delta$  = 155.2, 136.5,

131.1, 129.2, 128.3, 128.1, 127.3, 121.5, 119.7, 119.2, 118.8, 117.9, 112.4, 109.0, 82.5, 69.2, 46.1, 32.8, 29.5, 25.4, 23.3 ppm; HRMS (ESI): calcd for C<sub>21</sub>H<sub>24</sub>NO<sub>2</sub><sup>+</sup> [M + H<sup>+</sup>] 322.1802, found 322.1803.

**General procedure for the synthesis of 2-substituted indolizines 5a–e through hypervalent iodine-mediated alkene difunctionalization of *o*-vinylphenol 1a:**

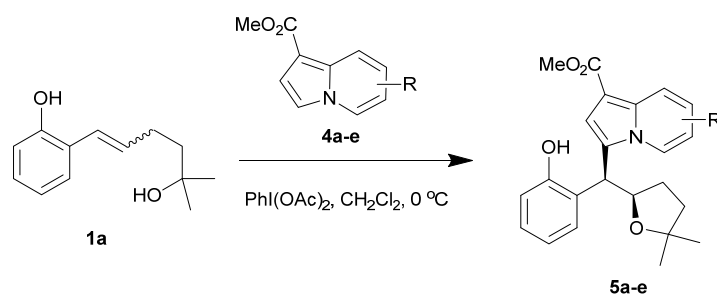

To a stirred solution of *o*-vinylphenol **1a** (0.2 mmol) and indolizines **4a–e** (0.24 mmol) in CH<sub>2</sub>Cl<sub>2</sub> (10 mL) at 0 °C was treated with PhI(OAc)<sub>2</sub> (0.24 mmol). The resulting mixture was stirred for 1 h before it was quenched with saturated Na<sub>2</sub>S<sub>2</sub>O<sub>3</sub> (sat. aq., 10 mL). The layers were separated, and the aqueous layer was extracted with CH<sub>2</sub>Cl<sub>2</sub> (3 × 5 mL). The combined organic layers were dried (Na<sub>2</sub>SO<sub>4</sub>) and concentrated *in vacuo*. Flash column chromatography (silica gel, hexanes:EtOAc 20:1) afforded corresponding products **5a–e**.

**Starting materials:** Indolizines **4a–e** were prepared according to the known literature procedures.<sup>3</sup>

**Methyl 3-((5,5-dimethyltetrahydrofuran-2-yl)(2-hydroxyphenyl)methyl) indolizine-1-carboxylate (5a):**

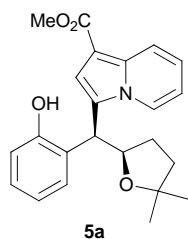

obtained in 87% yield and >20:1 dr as a white solid; m.p. 248–250 °C; IR (film)  $\nu_{\text{max}}$  3223, 2969, 2868, 1656, 1507, 1456, 1223, 1056, 879, 850, 766, 740 cm<sup>-1</sup>; <sup>1</sup>H NMR (400



MHz, CDCl<sub>3</sub>)  $\delta$  = 8.42 (s, 1 H), 8.12 (d,  $J$  = 8.8 Hz, 1 H), 7.25 (d,  $J$  = 6.7 Hz, 1 H), 7.12 (s, 1 H), 7.07 (t,  $J$  = 7.2 Hz, 1 H), 7.02–6.89 (m, 2 H), 6.58 (t,  $J$  = 7.1 Hz, 1 H), 6.47 (t,  $J$  = 6.3 Hz, 1 H), 6.28 (d,  $J$  = 7.4 Hz, 1 H), 4.88 (s, 2 H), 3.85 (s, 3 H), 2.39–2.22 (m, 1 H), 1.88 (d,  $J$  = 4.9 Hz, 1 H), 1.74–1.62 (m, 1 H), 1.20 (s, 4 H), 1.14 ppm (s, 3 H); <sup>13</sup>C NMR (100 MHz, CDCl<sub>3</sub>)  $\delta$  = 165.3, 155.8, 136.0, 129.0, 128.8, 123.6(2C), 123.1, 122.3, 120.8, 119.6, 118.5, 115.3, 112.4, 102.7, 82.2, 81.5, 50.9, 40.6, 38.5, 27.7, 27.4, 26.8 ppm; HRMS (ESI): calcd for C<sub>23</sub>H<sub>26</sub>NO<sub>4</sub><sup>+</sup> [M + H<sup>+</sup>] 380.1856, found 380.1852.

**Methyl 7-(tert-butyl)-3-((5,5-dimethyltetrahydrofuran-2-yl)(2-hydroxyphenyl)-methyl)indolizine-1-carboxylate (5b)**: obtained in 82% yield and >20:1 dr as a white solid; m.p. 270–272 °C; IR (film)  $\nu_{\max}$  3219, 2969, 2870, 1656, 1507, 1456, 1223,

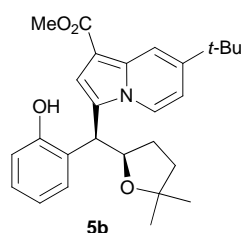

1135, 860, 766, 740 cm<sup>-1</sup>; <sup>1</sup>H NMR (400 MHz, CDCl<sub>3</sub>)  $\delta$  = 8.50 (s, 1 H), 8.15 (s, 1 H), 7.28 (s, 1 H), 7.18–7.09 (m, 2 H), 7.04 (d,  $J$  = 7.9 Hz, 1 H), 6.67 (t,  $J$  = 7.1 Hz, 1 H), 6.62 (dd,  $J$  = 7.4, 1.8

Hz, 1 H), 6.40 (d,  $J$  = 7.6 Hz, 1 H), 4.93 (s, 2 H), 3.92 (s, 3 H), 2.39 (td,  $J$  = 14.8, 7.3 Hz, 1 H), 2.03–1.88 (m, 1 H), 1.74 (ddd,  $J$  = 13.5, 7.9, 5.9 Hz, 1 H), 1.30 (s, 9 H), 1.27 (s, 4 H), 1.21 ppm (s, 3 H); <sup>13</sup>C NMR (100 MHz, CDCl<sub>3</sub>)  $\delta$  = 165.5, 155.9, 146.4, 136.6, 129.2, 128.8, 123.9, 123.1, 122.2, 120.8, 118.5, 115.1, 114.0, 111.9, 101.6, 82.2, 81.6, 50.8, 40.6, 38.5, 34.7, 30.5(3C), 27.7, 27.4, 26.8 ppm; HRMS (ESI): calcd for C<sub>27</sub>H<sub>34</sub>NO<sub>4</sub><sup>+</sup> [M + H<sup>+</sup>] 436.2482, found 436.2483.

**Methyl 7-benzoyl-3-((S)-((R)-5,5-dimethyltetrahydrofuran-2-yl)(2-hydroxyphenyl)methyl)indolizine-1-carboxylate (5c)**: obtained in 78% yield and >20:1 dr as a

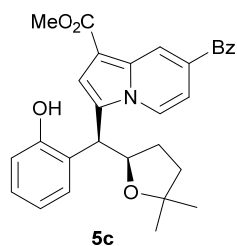

white solid; m.p. 203–205 °C; IR (film)  $\nu_{\text{max}}$  3293, 2970, 2865, 1697, 1651, 1449, 1351, 1218, 1111, 1055, 879, 736, 711  $\text{cm}^{-1}$ ;  $^1\text{H}$  NMR (400 MHz,  $\text{CDCl}_3$ )  $\delta$  = 8.64 (s, 1 H), 8.41 (s, 1 H), 7.81 (d,  $J$  = 7.1 Hz, 2 H), 7.59 (t,  $J$  = 7.3 Hz, 1 H), 7.50 (t,  $J$  = 7.5 Hz, 2 H), 7.43 (d,  $J$  = 7.3 Hz, 1 H), 7.33 (s, 1 H), 7.21–7.09 (m, 2 H), 7.05 (d,  $J$  = 8.0 Hz, 1 H), 6.69 (t,  $J$  = 7.4 Hz, 1 H), 6.35 (d,  $J$  = 7.6 Hz, 1 H), 5.00 (d,  $J$  = 2.5 Hz, 1 H), 4.95 (td,  $J$  = 6.9, 3.0 Hz, 1 H), 3.89 (s, 3 H), 2.38 (td,  $J$  = 14.5, 7.3 Hz, 1 H), 1.96 (ddd,  $J$  = 15.1, 10.7, 6.6 Hz, 1 H), 1.82–1.70 (m, 1 H), 1.38–1.25 (m, 4 H), 1.22 ppm (s, 3 H);  $^{13}\text{C}$  NMR (100 MHz,  $\text{CDCl}_3$ )  $\delta$  = 194.5, 164.8, 155.7, 137.2, 133.7, 132.5, 130.0(2C), 129.7, 129.1, 128.8, 128.4(2C), 125.8, 124.0, 123.4, 123.2, 121.0, 118.6, 117.1, 111.9, 107.6, 82.4, 81.3, 51.2, 40.7, 38.4, 27.8, 27.5, 26.8 ppm; HRMS (ESI): calcd for  $\text{C}_{30}\text{H}_{30}\text{NO}_5^+$  [ $\text{M} + \text{H}^+$ ] 484.2118, found 484.2123.

**Methyl 3-((5,5-dimethyltetrahydrofuran-2-yl)(2-hydroxyphenyl)methyl)-6,8-dimethylindolizine-1-carboxylate (5d):**

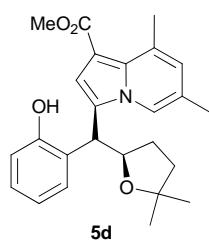

obtained in 80% yield and >20:1 dr as a white solid; m.p. 165–167 °C; IR (film)  $\nu_{\text{max}}$  2969, 2898, 1556, 1511, 1456, 1243, 1056, 880, 871, 740  $\text{cm}^{-1}$ ;  $^1\text{H}$  NMR (400 MHz,  $\text{CDCl}_3$ )  $\delta$  = 8.55 (s, 1 H), 7.13 (d,  $J$  = 11.6 Hz, 2 H), 7.03 (d,  $J$  = 7.8 Hz, 1 H), 6.97 (s, 1 H), 6.69–6.60 (m, 2 H), 6.37 (d,  $J$  = 7.3 Hz, 1 H), 5.02–4.76 (m, 2 H), 3.87 (s, 3 H), 2.75 (s, 3 H), 2.38 (dt,  $J$  = 14.8, 7.3 Hz, 1 H), 2.04 (s, 3 H), 1.94 (ddd,  $J$  = 12.8, 8.9, 6.6 Hz, 1 H), 1.82–1.63 (m, 1 H), 1.27 (s, 3 H), 1.22 ppm (s, 4 H);  $^{13}\text{C}$  NMR (100 MHz,  $\text{CDCl}_3$ )  $\delta$  = 165.1, 155.8, 134.1, 129.3, 129.1, 128.7, 126.9, 123.8, 122.1, 121.8, 120.7, 119.3, 118.4, 116.7, 103.7, 82.1, 81.7, 51.0, 40.7, 38.5, 27.8, 27.4,

26.7, 22.0, 18.1 ppm; HRMS (ESI): calcd for C<sub>25</sub>H<sub>30</sub>NO<sub>4</sub><sup>+</sup> [M + H<sup>+</sup>] 408.2169, found 408.2175.

**Methyl 3-((5,5-dimethyltetrahydrofuran-2-yl)(2-hydroxyphenyl)methyl)pyrrolo-**

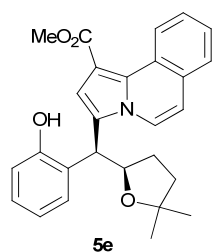

**[2,1-a]isoquinoline-1-carboxylate (5e):** obtained in 72% yield and >20:1 dr as a white solid; m.p. 228–230 °C; IR (film)  $\nu_{\text{max}}$  3261, 2972, 1699, 1507, 1458, 1203, 1017, 789, 759 cm<sup>-1</sup>; <sup>1</sup>H NMR (400 MHz, CDCl<sub>3</sub>)  $\delta$  = 9.85 (d, *J* = 8.3 Hz, 1 H), 8.53 (s, 1 H), 7.59 (dd,

*J* = 15.6, 7.5 Hz, 2 H), 7.52–7.45 (m, 1 H), 7.23–7.12 (m, 3 H), 7.05 (d, *J* = 7.8 Hz, 1 H), 6.78 (d, *J* = 7.3 Hz, 1 H), 6.66 (t, *J* = 7.3 Hz, 1 H), 6.40 (d, *J* = 7.5 Hz, 1 H), 5.00 (s, 2 H), 3.97 (s, 3 H), 2.42 (dd, *J* = 12.6, 7.1 Hz, 1 H), 2.15–1.90 (m, 1 H), 1.86–1.72 (m, 1 H), 1.30 (s, 4 H), 1.24 ppm (s, 3 H); <sup>13</sup>C NMR (100 MHz, CDCl<sub>3</sub>)  $\delta$  = 165.7, 155.7, 132.7, 129.4, 128.9, 128.7, 127.6, 127.5, 127.0, 126.6, 125.6, 124.6, 124.2, 121.5, 120.9, 118.5, 115.5, 113.5, 107.4, 82.2, 81.5, 51.4, 40.7, 38.5, 27.8, 27.4, 26.8 ppm; HRMS (ESI): calcd for C<sub>27</sub>H<sub>28</sub>NO<sub>4</sub><sup>+</sup> [M + H<sup>+</sup>] 430.2013, found 430.2010.

**General procedure for the synthesis of 3-substituted indoles 7a–g through hypervalent iodine-mediated alkene difunctionalization of trisubstituted *o*-vinylphenols 6:**

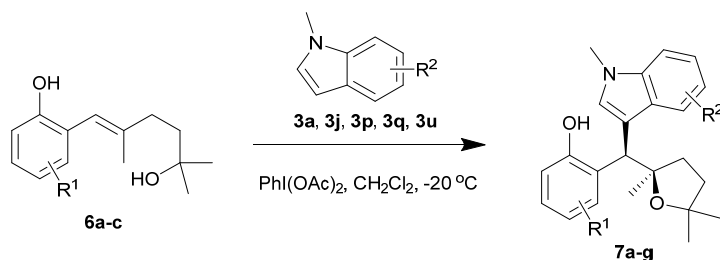

To a stirred solution of trisubstituted *o*-vinylphenols **6** (0.2 mmol) and indoles **3** (0.24 mmol) in CH<sub>2</sub>Cl<sub>2</sub> (10 mL) at -20 °C was treated with PhI(OAc)<sub>2</sub> (0.24 mmol). The resulting mixture was stirred for 1 h before it was quenched with saturated Na<sub>2</sub>S<sub>2</sub>O<sub>3</sub> (sat. aq., 10 mL). The layers were separated, and the aqueous layer was extracted with CH<sub>2</sub>Cl<sub>2</sub> (3 × 5 mL). The combined organic layers were dried (Na<sub>2</sub>SO<sub>4</sub>) and concentrated *in vacuo*. Flash column chromatography (silica gel, hexanes:EtOAc 20:1) afforded corresponding products **7a–g**.

**Starting materials:** Trisubstituted *o*-vinylphenols **6a–c** were prepared according to the known literature procedures.<sup>4</sup>

**(E)-2-(5-Hydroxy-2,5-dimethylhex-1-en-1-yl)phenol (6a):** white solid; m.p. 80–82

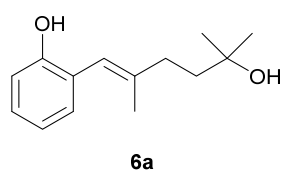

°C; IR (film)  $\nu_{\max}$  2981, 2886, 1581, 1268, 1150, 945, 816, 740 cm<sup>-1</sup>; <sup>1</sup>H NMR (400 MHz, CDCl<sub>3</sub>)  $\delta$  = 7.13 (dd, *J* = 10.9, 4.3 Hz, 1 H), 7.03 (d, *J* = 7.1 Hz, 1 H), 6.86 (td, *J* = 8.4, 1.5

Hz, 2 H), 6.20 (s, 1 H), 5.90 (brs, 1 H), 2.44–2.27 (m, 2 H), 1.81–1.72 (m, 2 H), 1.69 (s, 3 H), 1.57 (brs, 1 H), 1.30 ppm (s, 6 H); <sup>13</sup>C NMR (100 MHz, CDCl<sub>3</sub>)  $\delta$  = 153.2, 143.9, 129.6, 128.1, 124.7, 119.9, 119.0, 115.0, 71.6, 41.0, 34.7, 29.5(2C), 17.6 ppm; HRMS (ESI): calcd for C<sub>14</sub>H<sub>21</sub>O<sub>2</sub><sup>+</sup> [M + H<sup>+</sup>] 221.1536, found 221.1534.

**(E)-2-(5-Hydroxy-2,5-dimethylhex-1-en-1-yl)-4-methylphenol (6b):** white solid;

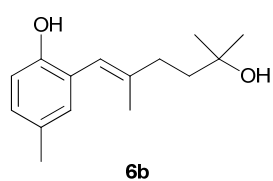

m.p. 72–74 °C; IR (film)  $\nu_{\max}$  2998, 2915, 1581, 1310, 1262, 1153, 898, 809, 751 cm<sup>-1</sup>; <sup>1</sup>H NMR (400 MHz, CDCl<sub>3</sub>)  $\delta$  = 6.93 (d, *J* = 7.5 Hz, 1 H), 6.83 (s, 1 H), 6.77 (d, *J* = 8.0 Hz, 1

H), 6.17 (s, 1 H), 5.64 (brs, 1 H), 2.40–2.29 (m, 2 H), 2.25 (s, 3 H), 1.78–1.71 (m, 2

H), 1.69 (s, 3 H), 1.29 ppm (s, 6 H);  $^{13}\text{C}$  NMR (100 MHz,  $\text{CDCl}_3$ )  $\delta$  = 150.9, 143.7, 129.9, 128.9, 128.6, 124.3, 119.1, 114.7, 71.6, 41.1, 34.7, 29.5(2C), 20.5, 17.6 ppm; HRMS (ESI): calcd for  $\text{C}_{15}\text{H}_{23}\text{O}_2^+$  [ $\text{M} + \text{H}^+$ ] 235.1693, found 235.1694.

**(E)-4-Chloro-2-(5-hydroxy-2,5-dimethylhex-1-en-1-yl)phenol (6c)**: white solid;

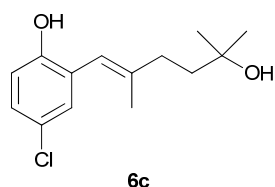

m.p. 89–91 °C; IR (film)  $\nu_{\text{max}}$  2971, 2925, 1481, 1411, 1268, 1050, 905, 816, 748  $\text{cm}^{-1}$ ;  $^1\text{H}$  NMR (400 MHz,  $\text{CDCl}_3$ )  $\delta$  = 7.09 (dd,  $J$  = 8.6, 2.2 Hz, 1 H), 7.00 (d,  $J$  = 2.1 Hz, 1 H), 6.80

(d,  $J$  = 8.6 Hz, 1 H), 6.11 (s, 1 H), 5.94 (brs, 1 H), 2.35 (t,  $J$  = 7.4 Hz, 2 H), 1.79–1.71 (m, 2 H), 1.67 (d,  $J$  = 0.9 Hz, 3 H), 1.30 ppm (s, 6 H);  $^{13}\text{C}$  NMR (100 MHz,  $\text{CDCl}_3$ )  $\delta$  = 152.1, 145.4, 129.1, 128.0, 126.1, 124.4, 118.0, 116.3, 71.8, 40.6, 34.7, 29.6(2C), 17.6 ppm; HRMS (ESI): calcd for  $\text{C}_{14}\text{H}_{20}\text{ClO}_2^+$  [ $\text{M} + \text{H}^+$ ] 255.1146, found 255.1143.

**2-((1-Methyl-1H-indol-3-yl)(2,5,5-trimethyltetrahydrofuran-2-yl)methyl)phenol**

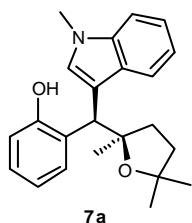

**(7a)**: obtained in 76% yield and >20:1 dr as a white solid; m.p. 186–188 °C; IR (film)  $\nu_{\text{max}}$  2974, 2903, 1583, 1481, 1258, 1066, 880, 748  $\text{cm}^{-1}$ ;  $^1\text{H}$  NMR (400 MHz,  $\text{CDCl}_3$ )  $\delta$  = 9.40 (s, 1 H), 7.35 (d,  $J$  = 7.9

Hz, 1 H), 7.28 (s, 1 H), 7.21 (s, 1 H), 7.17 (t,  $J$  = 7.6 Hz, 1 H), 7.10–7.04 (m, 1 H), 7.00 (t,  $J$  = 7.5 Hz, 2 H), 6.90 (d,  $J$  = 7.9 Hz, 1 H), 6.69 (t,  $J$  = 7.4 Hz, 1 H), 4.64 (s, 1 H), 3.82 (s, 3 H), 2.24–2.08 (m, 1 H), 2.01–1.88 (m, 2 H), 1.83–1.70 (m, 1 H), 1.39 (s, 3 H), 1.38 (s, 3 H), 1.35 ppm (s, 3 H);  $^{13}\text{C}$  NMR (100 MHz,  $\text{CDCl}_3$ )  $\delta$  = 155.3, 136.3, 131.4, 128.6, 128.4, 127.9, 127.2, 121.6, 119.6, 119.1, 118.9, 118.0, 113.2, 108.9, 89.3, 83.3, 50.4, 38.1, 38.0, 32.9, 30.4, 28.7, 25.1 ppm; HRMS (ESI): calcd for  $\text{C}_{23}\text{H}_{28}\text{NO}_2^+$  [ $\text{M} + \text{H}^+$ ] 350.2115, found 350.2121.

#### 4-Methyl-2-((1-methyl-1*H*-indol-3-yl)(2,5,5-trimethyltetrahydrofuran-2-yl)methyl)phenol (7b):

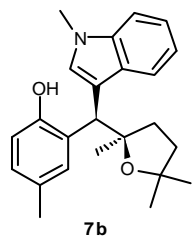

**l)phenol (7b):** obtained in 73% yield and >20:1 dr as a white solid; m.p. 178–180 °C; IR (film)  $\nu_{\max}$  2982, 2903, 1483, 1461, 1254, 1126, 786, 739  $\text{cm}^{-1}$ ;  $^1\text{H}$  NMR (400 MHz,  $\text{CDCl}_3$ )  $\delta$  = 9.16 (s, 1 H), 7.39 (d,  $J$  = 7.9 Hz, 1 H), 7.24 (dd,  $J$  = 7.7, 5.5 Hz, 2 H), 7.15 (t,  $J$  = 7.4 Hz, 1 H), 7.00 (t,  $J$  = 7.3 Hz, 1 H), 6.91–6.80 (m, 2 H), 6.76 (d,  $J$  = 7.9 Hz, 1 H), 4.55 (s, 1 H), 3.80 (s, 3 H), 2.24–2.04 (m, 4 H), 1.98–1.81 (m, 2 H), 1.81–1.66 (m, 1 H), 1.36 (s, 3 H), 1.33 ppm (d,  $J$  = 3.5 Hz, 6 H);  $^{13}\text{C}$  NMR (100 MHz,  $\text{CDCl}_3$ )  $\delta$  = 152.9, 136.2, 131.9, 128.7, 128.4(2C), 128.1, 127.3, 121.5, 119.0, 118.8, 117.8, 113.2, 108.9, 89.3, 83.3, 50.4, 38.0, 37.9, 32.9, 30.5, 28.7, 25.3, 20.7 ppm; HRMS (ESI): calcd for  $\text{C}_{24}\text{H}_{30}\text{NO}_2^+$  [ $\text{M} + \text{H}^+$ ] 364.2271, found 364.2274.

#### 4-Chloro-2-((1-methyl-5-phenyl-1*H*-indol-3-yl)(2,5,5-trimethyltetrahydrofuran-2-yl)methyl)phenol (7c):

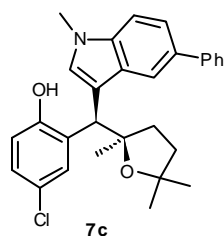

**-yl)methyl)phenol (7c):** obtained in 80% yield and >20:1 dr as a white solid; m.p. 208–210 °C; IR (film)  $\nu_{\max}$  2984, 2873, 1583, 1471, 1258, 1168, 1066, 870, 746, 729  $\text{cm}^{-1}$ ;  $^1\text{H}$  NMR (400 MHz,  $\text{CDCl}_3$ )  $\delta$  = 9.50 (s, 1 H), 7.61–7.52 (m, 3 H), 7.49–7.32 (m, 4 H), 7.30 (d,  $J$  = 7.2 Hz, 1 H), 7.23 (s, 1 H), 7.03 (d,  $J$  = 5.8 Hz, 2 H), 6.85 (d,  $J$  = 9.2 Hz, 1 H), 4.67 (s, 1 H), 3.86 (s, 3 H), 2.21–2.05 (m, 1 H), 2.05–1.86 (m, 2 H), 1.80 (d,  $J$  = 12.2 Hz, 1 H), 1.39 (s, 3 H), 1.38 (s, 3 H), 1.36 ppm (s, 3 H);  $^{13}\text{C}$  NMR (100 MHz,  $\text{CDCl}_3$ )  $\delta$  = 154.1, 142.4, 135.9, 132.8, 130.7, 130.2, 128.8, 128.6(2C), 127.9, 127.8, 127.4(2C), 126.3, 124.4, 121.8, 119.4, 117.2, 112.9, 109.4, 89.4, 83.7, 50.0, 38.2, 37.9, 33.1, 30.3, 28.7,

25.0 ppm; HRMS (ESI): calcd for  $C_{29}H_{31}ClNO_2^+$   $[M + H^+]$  460.2038, found 460.2033.

**2-((1-Methyl-2-phenyl-1*H*-indol-3-yl)(2,5,5-trimethyltetrahydrofuran-2-yl)meth-**

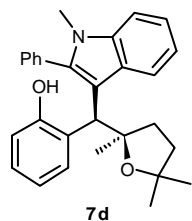

**yl)phenol (7d):** obtained in 64% yield and >20:1 dr as a white solid;

m.p. 163–165 °C; IR (film)  $\nu_{\max}$  2998, 2883, 1681, 1480, 1260, 1046,

780, 748  $cm^{-1}$ ;  $^1H$  NMR (400 MHz,  $CDCl_3$ )  $\delta$  = 9.65 (s, 1 H), 7.93 (d,

$J$  = 8.0 Hz, 1 H), 7.48 (brs, 1 H), 7.40 (d,  $J$  = 8.0 Hz, 3 H), 7.30–7.26 (m, 3 H), 7.23–

7.17 (m, 1 H), 7.11 (dd,  $J$  = 10.9, 4.3 Hz, 1 H), 6.98–6.82 (m, 2 H), 6.67 (dd,  $J$  = 10.8,

4.1 Hz, 1 H), 4.54 (s, 1 H), 3.60 (s, 3 H), 1.90–1.73 (m, 1 H), 1.66 (ddd,  $J$  = 15.5, 10.7,

5.9 Hz, 1 H), 1.53–1.38 (m, 5 H), 1.23 (s, 3 H), 0.85 ppm (s, 3 H);  $^{13}C$  NMR (100

MHz,  $CDCl_3$ )  $\delta$  = 155.3, 140.9, 137.7, 131.7, 131.1, 130.4, 128.9, 128.8, 128.4, 127.7,

127.0, 122.3(2C), 121.5, 119.6, 119.2, 117.5, 112.6(2C), 109.7, 89.5, 83.1, 51.4, 37.9,

37.5, 31.1, 30.0, 27.7, 26.8 ppm; HRMS (ESI): calcd for  $C_{29}H_{32}NO_2^+$   $[M + H^+]$

426.2428, found 426.2423.

**2-((5-(Benzyloxy)-1-methyl-1*H*-indol-3-yl)(2,5,5-trimethyltetrahydrofuran-2-yl)-**

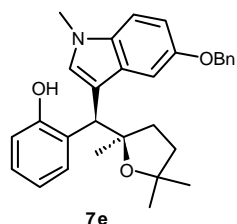

**methyl)phenol (7e):** obtained in 60% yield and 14:1 dr as a white

solid; m.p. 134–136 °C; IR (film)  $\nu_{\max}$  2971, 2925, 1580, 1497,

1377, 1258, 1065, 879, 753, 698  $cm^{-1}$ ;  $^1H$  NMR (400 MHz,

$CDCl_3$ )  $\delta$  = 9.55 (s, 1 H), 7.40–7.29 (m, 5 H), 7.22 (s, 1 H), 7.02 (dd,  $J$  = 15.7, 7.7 Hz,

2 H), 6.93–6.79 (m, 3 H), 6.63 (t,  $J$  = 7.0 Hz, 1 H), 6.44 (d,  $J$  = 7.7 Hz, 1 H), 5.37 (s, 1

H), 5.12 (q,  $J$  = 11.9 Hz, 2 H), 3.76 (s, 3 H), 2.20–2.01 (m, 1 H), 1.95–1.79 (m, 1 H),

1.77–1.62 (m, 2 H), 1.34 (s, 3 H), 1.29 (s, 3 H), 1.20 ppm (s, 3 H);  $^{13}C$  NMR (100

MHz, CDCl<sub>3</sub>)  $\delta$  = 155.5, 153.9, 137.9, 137.4, 132.3, 129.4, 128.4(2C), 127.7(3C), 127.5, 126.4, 121.9, 119.2, 117.9, 114.0, 102.5, 100.6, 89.5, 83.3, 69.9, 50.4, 37.9, 37.7, 33.1, 30.5, 29.7, 28.4, 25.7 ppm; HRMS (ESI): calcd for C<sub>30</sub>H<sub>34</sub>NO<sub>3</sub><sup>+</sup> [M + H<sup>+</sup>] 456.2533, found 456.2539.

**2-((1-Methyl-5-phenyl-1*H*-indol-3-yl)(2,5,5-trimethyltetrahydrofuran-2-yl)meth-**

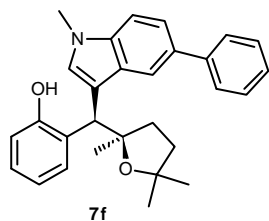

**yl)phenol (7f):** obtained in 71% yield and >20:1 dr as a white solid; m.p. 70–72 °C; IR (film)  $\nu_{\max}$  2981, 2934, 1569, 1476, 1277, 1253, 1061, 886, 753, 738 cm<sup>-1</sup>; <sup>1</sup>H NMR (400 MHz, CDCl<sub>3</sub>)  $\delta$  = 9.43 (s, 1 H), 7.54 (d, *J* = 7.2 Hz, 3 H), 7.41 (dd, *J* = 15.4, 8.0 Hz, 3 H), 7.31 (dd, *J* = 17.6, 8.0 Hz, 2 H), 7.26 (s, 1 H), 7.07 (t, *J* = 6.9 Hz, 2 H), 6.90 (d, *J* = 7.5 Hz, 1 H), 6.72 (t, *J* = 7.0 Hz, 1 H), 4.67 (s, 1 H), 3.85 (s, 3 H), 2.24–2.11 (m, 1 H), 1.96 (ddd, *J* = 22.3, 14.7, 7.9 Hz, 2 H), 1.76 (dd, *J* = 15.1, 9.4 Hz, 1 H), 1.40 (s, 3 H), 1.38 ppm (s, 6 H); <sup>13</sup>C NMR (100 MHz, CDCl<sub>3</sub>)  $\delta$  = 155.3, 142.6, 135.9, 132.6, 131.4,

129.6, 129.1, 128.6, 128.3, 128.0(2C), 127.4, 126.2, 121.6, 119.7, 118.1, 117.5, 115.3, 113.6, 109.2, 89.3, 83.4, 50.5, 38.0(2C), 33.0, 30.4, 28.8, 25.3 ppm; HRMS (ESI): calcd for C<sub>29</sub>H<sub>32</sub>NO<sub>2</sub><sup>+</sup> [M + H<sup>+</sup>] 426.2428, found 426.2430.

**2-((5-(2-Methoxyphenyl)-1-methyl-1*H*-indol-3-yl)(2,5,5-trimethyltetrahydrofuran-**

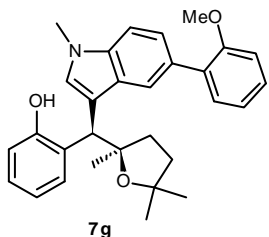

**n-2-yl)methyl)phenol (7g):** obtained in 69% yield and >20:1 dr as a white solid; m.p. 154–156 °C; IR (film)  $\nu_{\max}$  2972, 2900, 1582, 1482, 1378, 1252, 1059, 880, 753 cm<sup>-1</sup>; <sup>1</sup>H NMR (400 MHz, CDCl<sub>3</sub>)  $\delta$  = 9.41 (s, 1 H), 7.50 (s, 1 H), 7.37 (d, *J* = 8.4 Hz, 1 H), 7.30–7.25 (m, 3 H), 7.22 (s, 1 H), 7.06 (t, *J* = 7.4 Hz, 2 H), 7.02–6.92 (m, 2 H), 6.88 (d, *J* = 7.9 Hz, 1



H), 6.71 (t,  $J = 7.4$  Hz, 1 H), 4.64 (s, 1 H), 3.83 (s, 3 H), 3.72 (s, 3 H), 2.18 (dd,  $J = 20.7, 12.9$  Hz, 1 H), 2.01–1.87 (m, 2 H), 1.82–1.74 (m, 1 H), 1.39 (s, 3 H), 1.36 ppm (s, 6 H);  $^{13}\text{C}$  NMR (100 MHz,  $\text{CDCl}_3$ )  $\delta = 156.5, 155.3, 135.6, 132.0, 131.5, 131.3, 129.3, 128.6, 128.4, 127.9, 127.7, 127.6, 123.8, 120.7, 120.0, 119.6, 118.0, 113.5, 111.2, 108.4, 89.4, 83.4, 55.5, 50.5, 38.1, 38.0, 32.9, 30.4, 28.7, 25.2$  ppm; HRMS (ESI): calcd for  $\text{C}_{30}\text{H}_{34}\text{NO}_3^+$  [ $\text{M} + \text{H}^+$ ] 456.2533, found 456.2528.

#### Inverse-electron demand Diels–Alder reaction:

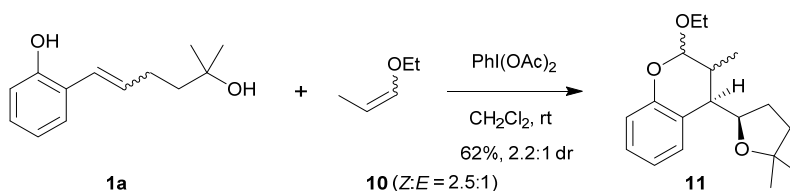

To a stirred solution of *o*-vinylphenol **1a** (41 mg, 0.20 mmol) and methyl-1-propenyl ether **10** (2.8 mL, 10 mmol, *Z/E* 2.5:1) in  $\text{CH}_2\text{Cl}_2$  (10 mL) at room temperature was added  $\text{PhI(OAc)}_2$  (77 mg, 0.24 mmol). The resulting mixture was stirred for 4 h before it was quenched with  $\text{NaHCO}_3$  (sat. aq., 5 mL). The layers were separated, and the aqueous layer was extracted with  $\text{CH}_2\text{Cl}_2$  ( $3 \times 5$  mL). The combined organic layers were dried ( $\text{Na}_2\text{SO}_4$ ) and concentrated *in vacuo*. Flash column chromatography (silica gel, hexanes:EtOAc 80:1) afforded **11** (37.7 mg, 62%, dr = 2.2:1) as a colorless oil.

#### 4-(5,5-Dimethyltetrahydrofuran-2-yl)-2-ethoxy-3-methylchromane (**11**): IR (film)

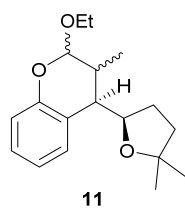

$\nu_{\text{max}}$  2970, 2932, 1582, 1486, 1241, 1146, 1110, 1044, 755  $\text{cm}^{-1}$ ;  $^1\text{H}$  NMR (400 MHz,  $\text{CDCl}_3$ )  $\delta = 7.35$  (d,  $J = 7.5$  Hz, 0.69 H), 7.29 (d,  $J = 7.6$  Hz, 0.31 H), 7.12 (t,  $J = 7.0$  Hz, 1 H), 6.85 (dd,  $J = 13.9, 7.7$  Hz, 2

H), 5.14 (d,  $J = 2.2$  Hz, 0.69 H), 5.05 (d,  $J = 2.1$  Hz, 0.31 H), 4.35 (dd,  $J = 11.5, 6.6$  Hz, 0.31 H), 4.17 (dd,  $J = 11.8, 6.0$  Hz, 0.69 H), 4.03–3.88 (m, 1 H), 3.70–3.53 (m, 1 H), 3.09 (t,  $J = 4.8$  Hz, 0.31 H), 2.74 (t,  $J = 4.6$  Hz, 0.69 H), 2.49–2.37 (m, 0.31 H), 2.28–2.18 (m, 0.69 H), 2.16–2.06 (m, 0.31 H), 1.96–1.86 (m, 0.69 H), 1.65 (ddd,  $J = 15.2, 8.8, 3.1$  Hz, 3 H), 1.31 (s, 1 H), 1.28 (s, 2 H), 1.26–1.19 (m, 6 H), 1.07 (d,  $J = 7.1$  Hz, 1 H), 1.01 ppm (d,  $J = 6.9$  Hz, 2 H);  $^{13}\text{C}$  NMR (100 MHz,  $\text{CDCl}_3$ )  $\delta = 153.0(2\text{C}), 130.3, 129.1, 127.6(2\text{C}), 123.0, 122.3, 120.3, 120.1, 116.7, 116.4, 101.4, 99.5, 81.20, 80.6, 79.40, 77.6, 64.5, 64.4, 45.6, 43.2, 38.9, 38.5, 33.6, 33.0, 30.5, 29.4, 28.9, 28.8, 27.8, 27.1, 15.1(2\text{C}), 13.5, 10.3$  ppm; HRMS (ESI): calcd for  $\text{C}_{18}\text{H}_{27}\text{O}_3^+$   $[\text{M} + \text{H}^+]$  291.1955, found 291.1961.

**General procedure for the synthesis of 2-substituted indolizines 13a–j through hypervalent iodine-mediated alkene difunctionalization of *p*-vinylphenols 12:**

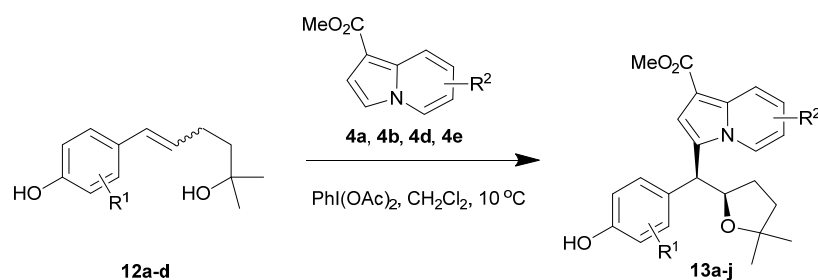

To a stirred solution of *p*-vinylphenol **12** (0.2 mmol) and indolizines **4** (0.24 mmol) in  $\text{CH}_2\text{Cl}_2$  (10 mL) at  $10\text{ }^\circ\text{C}$  was treated with  $\text{PhI}(\text{OAc})_2$  (0.24 mmol). The resulting mixture was stirred for 1 h before it was quenched with saturated  $\text{Na}_2\text{S}_2\text{O}_3$  (sat. aq., 10 mL). The layers were separated, and the aqueous layer was extracted with  $\text{CH}_2\text{Cl}_2$  ( $3 \times 5$  mL). The combined organic layers were dried ( $\text{Na}_2\text{SO}_4$ ) and concentrated *in*

*vacuo*. Flash column chromatography (silica gel, hexanes:EtOAc 20:1) afforded corresponding products **13a–j**.

**Starting materials:** *p*-Vinylphenols **12a–d** were synthesized according to the known literature procedures.<sup>1</sup>

**4-(5-Hydroxy-5-methylhex-1-en-1-yl)phenol (12a):** ca. 6.7:1 inseparable mixture of

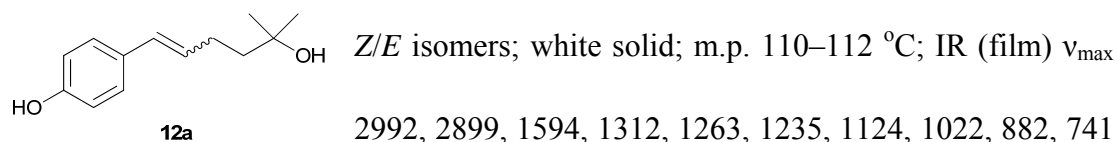

2992, 2899, 1594, 1312, 1263, 1235, 1124, 1022, 882, 741  $\text{cm}^{-1}$ ;  $^1\text{H}$  NMR (400 MHz,  $\text{CDCl}_3$ , *Z* isomer)  $\delta$  = 7.16 (d,  $J$  = 8.5 Hz, 2 H), 6.79 (d,  $J$  = 8.6 Hz, 2 H), 6.34 (d,  $J$  = 11.7 Hz, 1 H), 6.00 (s, 1 H), 5.55 (dt,  $J$  = 11.6, 7.2 Hz, 1 H), 2.42 (td,  $J$  = 8.7, 1.6 Hz, 2 H), 1.68–1.62 (m, 2 H), 1.60 (s, 1 H), 1.24 ppm (s, 6 H);  $^{13}\text{C}$  NMR (100 MHz,  $\text{CDCl}_3$ , *Z* isomer)  $\delta$  = 154.6, 130.9, 130.1(2C), 128.6, 115.2(2C), 71.6, 43.7, 43.1, 29.2(2C), 23.6 ppm; HRMS (ESI): calcd for  $\text{C}_{13}\text{H}_{19}\text{O}_2^+$  [ $\text{M} + \text{H}^+$ ] 207.1380, found 207.1381.

**(Z)-4-(5-Hydroxy-5-methylhex-1-en-1-yl)-2,6-dimethylphenol (12b):** white solid;

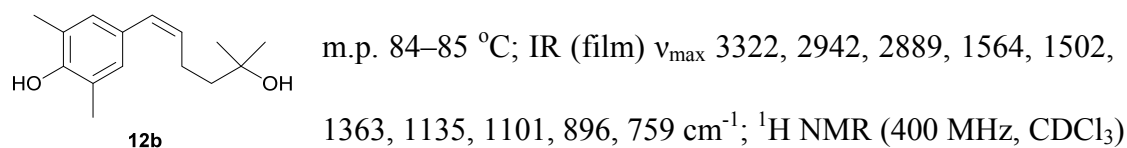

$\delta$  = 6.93 (s, 2 H), 6.30 (d,  $J$  = 11.6 Hz, 1 H), 5.54 (dt,  $J$  = 11.6, 7.3 Hz, 1 H), 4.95 (s, 1 H), 2.42 (ddd,  $J$  = 8.7, 8.1, 1.5 Hz, 2 H), 2.24 (s, 6 H), 1.70–1.61 (m, 2 H), 1.24 ppm (s, 6 H);  $^{13}\text{C}$  NMR (100 MHz,  $\text{CDCl}_3$ )  $\delta$  = 151.0, 130.6(2C), 129.6, 129.0(2C), 128.7, 122.8, 71.2, 43.7, 29.1(2C), 23.7, 16.0(2C) ppm; HRMS (ESI): calcd for  $\text{C}_{15}\text{H}_{23}\text{O}_2^+$  [ $\text{M} + \text{H}^+$ ] 235.1693, found 235.1695.

**2-Bromo-4-(5-hydroxy-5-methylhex-1-en-1-yl)phenol (12c):** ca. 4:1 mixture of *Z/E*

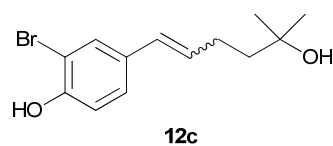

isomers; white solid; m.p. 147–149 °C; IR (film)  $\nu_{\max}$  3372, 2983, 2882, 1578, 1498, 1231, 1082, 1042, 856, 818, 738  $\text{cm}^{-1}$ ;  $^1\text{H}$  NMR (400 MHz,  $\text{CDCl}_3$ )  $\delta$  = 7.43 (d,  $J$  = 1.9 Hz, 0.2 H), 7.39 (d,  $J$  = 1.8 Hz, 0.8 H), 7.17 (dd,  $J$  = 8.6, 2.0 Hz, 0.2 H), 7.13 (dd,  $J$  = 8.4, 1.8 Hz, 0.8 H), 6.96 (d,  $J$  = 8.4 Hz, 0.8 H), 6.92 (d,  $J$  = 8.4 Hz, 0.2 H), 6.28 (d,  $J$  = 11.5 Hz, 1 H), 6.08 (dt,  $J$  = 15.7, 6.8 Hz, 0.2 H), 5.83 (s, 0.8 H), 5.76 (s, 0.2 H), 5.61 (dt,  $J$  = 11.5, 7.3 Hz, 0.8 H), 2.44–2.33 (m, 1.6 H), 2.33–2.23 (m, 0.4 H), 1.63 (dd,  $J$  = 9.7, 6.9 Hz, 2 H), 1.43 (s, 1 H), 1.26 (s, 1.2 H), 1.23 (s, 4.8 H);  $^{13}\text{C}$  NMR (100 MHz,  $\text{CDCl}_3$ )  $\delta$  = 151.3, 151.0, 132.4, 132.1, 131.6(2C), 130.1, 129.5, 129.3, 128.0, 127.2, 126.7, 116.1, 115.8, 110.4, 110.0, 71.2(2C), 43.6, 43.2, 29.3(2C), 29.2(2C), 27.9, 23.6 ppm; HRMS (ESI): calcd for  $\text{C}_{13}\text{H}_{18}\text{BrO}_2^+$  [ $\text{M} + \text{H}^+$ ] 285.0485, found 285.0489.

**2-Ethoxy-4-(5-hydroxy-5-methylhex-1-en-1-yl)phenol (12d):** ca. 7.7:1 mixture of

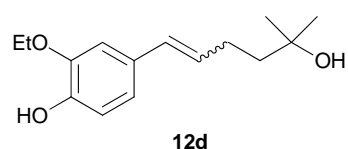

*Z/E* isomers; colorless oil; IR (film)  $\nu_{\max}$  3392, 2972, 2929, 1594, 1512, 1263, 1235, 1122, 1042, 826, 749  $\text{cm}^{-1}$ ;  $^1\text{H}$  NMR (400 MHz,  $\text{CDCl}_3$ , *Z* isomer)  $\delta$  = 6.88 (d,  $J$  = 8.0 Hz, 1 H), 6.82 (dd,  $J$  = 15.9, 8.1 Hz, 2 H), 6.32 (d,  $J$  = 11.5 Hz, 1 H), 5.54 (dt,  $J$  = 11.6, 7.2 Hz, 1 H), 4.08 (q,  $J$  = 6.9 Hz, 2 H), 2.41 (dd,  $J$  = 15.3, 7.2 Hz, 2 H), 1.63 (dd,  $J$  = 9.6, 6.8 Hz, 2 H), 1.42 (t,  $J$  = 7.0 Hz, 3 H), 1.21 ppm (s, 6 H);  $^{13}\text{C}$  NMR (100 MHz,  $\text{CDCl}_3$ , *Z* isomer)  $\delta$  = 145.4, 144.5, 130.9, 129.8, 128.7, 121.8, 114.4, 112.3, 70.8, 64.3, 43.6, 29.1(2C), 23.6, 14.8 ppm; HRMS (ESI): calcd for  $\text{C}_{15}\text{H}_{23}\text{O}_3^+$  [ $\text{M} + \text{H}^+$ ] 251.1642, found 251.1643.

**Methyl 3-((5,5-dimethyltetrahydrofuran-2-yl)(4-hydroxyphenyl)methyl)indolizine-1-carboxylate (13a):**

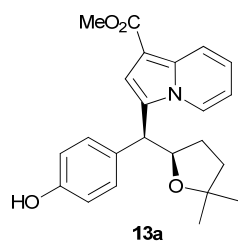

**zine-1-carboxylate (13a):** obtained in 83% yield and >20:1 dr as

a white solid; m.p. 216–218 °C; IR (film)  $\nu_{\max}$  2971, 2925, 1692,

1663, 1510, 1259, 1227, 1058, 748  $\text{cm}^{-1}$ ;  $^1\text{H}$  NMR (400 MHz,

$\text{CDCl}_3$ )  $\delta$  = 8.16 (d,  $J$  = 9.0 Hz, 1 H), 7.62 (d,  $J$  = 7.1 Hz, 1 H), 7.30 (s, 1 H), 6.98 (t,  $J$

= 10.9 Hz, 3 H), 6.71 (d,  $J$  = 8.5 Hz, 2 H), 6.54 (t,  $J$  = 6.8 Hz, 1 H), 5.11 (brs, 1 H),

4.66 (dd,  $J$  = 13.7, 6.5 Hz, 1 H), 4.20 (d,  $J$  = 6.1 Hz, 1 H), 3.91 (s, 3 H), 1.94 (dt,  $J$  =

12.3, 6.9 Hz, 1 H), 1.80 (dt,  $J$  = 16.0, 7.7 Hz, 1 H), 1.65 (dd,  $J$  = 12.0, 7.7 Hz, 1 H),

1.44–1.31 (m, 1 H), 1.26 (s, 3 H), 1.15 ppm (s, 3 H);  $^{13}\text{C}$  NMR (100 MHz,  $\text{CDCl}_3$ )  $\delta$  =

165.7, 154.8, 136.1, 130.1, 129.9(2C), 125.7, 123.7, 121.8, 119.6, 115.3(2C), 115.0,

112.0, 102.6, 81.2, 80.0, 50.9, 47.7, 38.2, 30.0, 28.6, 27.8 ppm; HRMS (ESI): calcd

for  $\text{C}_{23}\text{H}_{26}\text{NO}_4^+$  [ $\text{M} + \text{H}^+$ ] 380.1856, found 380.1860.

**Methyl 7-(tert-butyl)-3-((5,5-dimethyltetrahydrofuran-2-yl)(4-hydroxyphenyl)-**

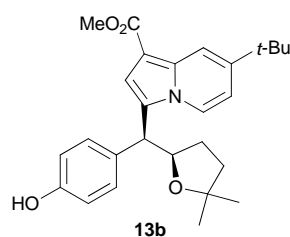

**methyl)indolizine-1-carboxylate (13b):** obtained in 80%

yield and >20:1 dr as a white solid; m.p. 221–223 °C; IR

(film)  $\nu_{\max}$  2981, 2919, 1691, 1563, 1510, 1351, 1219, 1158,

751  $\text{cm}^{-1}$ ;  $^1\text{H}$  NMR (400 MHz,  $\text{CDCl}_3$ )  $\delta$  = 8.09 (s, 1 H), 7.53 (d,  $J$  = 7.3 Hz, 1 H),

7.22 (s, 1 H), 6.97 (d,  $J$  = 8.1 Hz, 2 H), 6.71 (d,  $J$  = 8.1 Hz, 2 H), 6.60 (d,  $J$  = 6.1 Hz,

1 H), 5.74 (brs, 1 H), 4.64 (d,  $J$  = 6.4 Hz, 1 H), 4.18 (d,  $J$  = 5.7 Hz, 1 H), 3.91 (s, 3 H),

1.94 (dd,  $J$  = 12.4, 6.4 Hz, 1 H), 1.77 (dd,  $J$  = 19.9, 7.7 Hz, 1 H), 1.68–1.55 (m, 1 H),

1.42–1.25 (m, 13 H), 1.13 ppm (s, 3 H);  $^{13}\text{C}$  NMR (100 MHz,  $\text{CDCl}_3$ )  $\delta$  = 166.1,

155.0, 145.9, 136.7, 130.1, 129.7(2C), 124.9, 123.3, 115.3(2C), 114.7, 114.0, 111.4,

101.4, 81.1, 79.9, 50.8, 47.5, 38.2, 34.6, 30.4(3C), 29.7, 28.5, 27.8 ppm; HRMS (ESI): calcd for  $C_{27}H_{34}NO_4^+$   $[M + H^+]$  436.2482, found 436.2487.

**Methyl 3-((5,5-dimethyltetrahydrofuran-2-yl)(4-hydroxyphenyl)methyl)-6,8-**

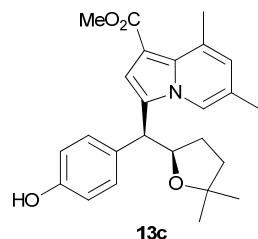

**dimethylindolizine-1-carboxylate (13c):** obtained in 77%

yield and >20:1 dr as a white solid; m.p. 164–166 °C; IR (film)

$\nu_{\max}$  2981, 2885, 1611, 1413, 1262, 1058, 789, 741  $cm^{-1}$ ;  $^1H$

NMR (400 MHz,  $CDCl_3$ )  $\delta$  = 7.28 (s, 1 H), 7.25 (s, 1 H), 7.01 (d,  $J$  = 8.5 Hz, 2 H),

6.70 (d,  $J$  = 8.5 Hz, 2 H), 6.59 (s, 1 H), 4.94 (brs, 1 H), 4.65 (dd,  $J$  = 13.3, 6.7 Hz, 1

H), 4.16 (d,  $J$  = 6.1 Hz, 1 H), 3.85 (s, 3 H), 2.72 (s, 3 H), 2.08 (s, 3 H), 1.96 (td,  $J$  =

12.6, 6.5 Hz, 1 H), 1.86–1.74 (m, 1 H), 1.64 (dd,  $J$  = 12.1, 7.6 Hz, 1 H), 1.37–1.28 (m,

1 H), 1.25 (s, 3 H), 1.16 ppm (s, 3 H);  $^{13}C$  NMR (100 MHz,  $CDCl_3$ )  $\delta$  = 165.5, 154.7,

134.1, 130.2(2C), 129.4, 126.3, 124.7, 121.2, 119.4, 116.3, 115.2(2C), 103.8, 81.0,

80.1, 51.0, 47.7, 38.2, 29.9(2C), 28.6, 27.8, 22.0, 18.2 ppm; HRMS (ESI): calcd for

$C_{25}H_{30}NO_4^+$   $[M + H^+]$  408.2169, found 408.2173.

**Methyl 3-((5,5-dimethyltetrahydrofuran-2-yl)(4-hydroxyphenyl)methyl)pyrrolo**

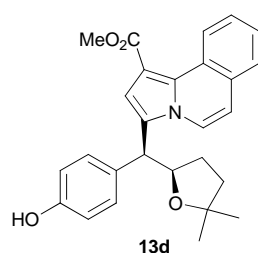

**[2,1-a]isoquinoline-1-carboxylate (13d):** obtained in 70%

yield and >20:1 dr as a white solid; m.p. 151–153 °C; IR (film)

$\nu_{\max}$  3272, 2903, 1509, 1258, 1207, 1051, 887, 760  $cm^{-1}$ ;  $^1H$

NMR (400 MHz,  $CDCl_3$ )  $\delta$  = 9.82 (d,  $J$  = 8.3 Hz, 1 H), 7.54 (dd,

$J$  = 17.6, 9.7 Hz, 3 H), 7.48–7.40 (m, 1 H), 7.25 (d,  $J$  = 10.9 Hz, 1 H), 7.01 (d,  $J$  = 7.8

Hz, 2 H), 6.77 (d,  $J$  = 7.4 Hz, 1 H), 6.70 (d,  $J$  = 7.7 Hz, 2 H), 5.22 (brs, 1 H), 4.70 (dd,

$J$  = 12.7, 6.3 Hz, 1 H), 4.26 (d,  $J$  = 5.7 Hz, 1 H), 3.95 (s, 3 H), 2.06–1.93 (m, 1 H),

1.82 (dd,  $J = 19.9, 7.5$  Hz, 1 H), 1.65 (s, 1 H), 1.35 (dd,  $J = 12.3, 7.0$  Hz, 1 H), 1.28 (s, 3 H), 1.18 ppm (s, 3 H);  $^{13}\text{C}$  NMR (100 MHz,  $\text{CDCl}_3$ )  $\delta = 166.1, 154.9, 132.6, 130.1(2\text{C}), 128.6, 127.3(2\text{C}), 127.0(3\text{C}), 126.5, 125.8, 121.8, 115.3, 115.2, 113.0(2\text{C}), 107.4, 81.2, 79.9, 51.4, 47.6, 38.2, 29.9, 28.6, 27.8$  ppm; HRMS (ESI): calcd for  $\text{C}_{27}\text{H}_{28}\text{NO}_4^+$  [ $\text{M} + \text{H}^+$ ] 430.2013, found 430.2017.

**Methyl 7-(tert-butyl)-3-((5,5-dimethyltetrahydrofuran-2-yl) (4-hydroxy-3,5-**

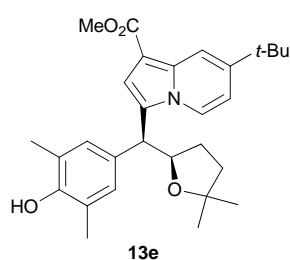

**dimethylphenyl)methyl)indolizine-1-carboxylate (13e):**

obtained in 76% yield and >20:1 dr as a white solid; m.p. 98–100 °C; IR (film)  $\nu_{\text{max}}$  2971, 2845, 1510, 1459, 1227, 1168, 887, 748  $\text{cm}^{-1}$ ;  $^1\text{H}$  NMR (400 MHz,  $\text{CDCl}_3$ )  $\delta = 8.12$  (s, 1 H),

7.60 (d,  $J = 7.3$  Hz, 1 H), 7.23 (s, 1 H), 6.74 (s, 2 H), 6.62 (d,  $J = 6.9$  Hz, 1 H), 4.73–4.55 (m, 2 H), 4.08 (d,  $J = 6.2$  Hz, 1 H), 3.91 (s, 3 H), 2.16 (s, 6 H), 1.91 (dt,  $J = 12.6, 6.3$  Hz, 1 H), 1.80 (dt,  $J = 14.8, 7.6$  Hz, 1 H), 1.63 (dt,  $J = 15.0, 7.6$  Hz, 1 H), 1.42–1.21 (m, 13 H), 1.14 ppm (s, 3 H);  $^{13}\text{C}$  NMR (100 MHz,  $\text{CDCl}_3$ )  $\delta = 165.9, 151.2, 145.7, 136.6, 129.5, 129.0(2\text{C}), 125.1, 123.3, 122.8(2\text{C}), 114.5, 114.0, 111.3, 101.5, 81.0, 80.1, 50.7, 47.8, 38.2, 34.6, 30.5(3\text{C}), 30.0, 28.6, 27.9, 15.9(2\text{C})$  ppm; HRMS (ESI): calcd for  $\text{C}_{29}\text{H}_{38}\text{NO}_4^+$  [ $\text{M} + \text{H}^+$ ] 464.2795, found 464.2789.

**Methyl 3-((3-bromo-4-hydroxyphenyl)(5,5-dimethyltetrahydrofuran-2-yl) methyl)**

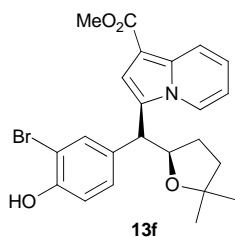

**indolizine-1-carboxylate (13f):** obtained in 78% yield and >20:1 dr as a white solid; m.p. 155–157 °C; IR (film)  $\nu_{\text{max}}$  2988, 2875, 1563, 1310, 1126, 1058, 738  $\text{cm}^{-1}$ ;  $^1\text{H}$  NMR (400 MHz,  $\text{CDCl}_3$ )  $\delta$

$= 8.18$  (d,  $J = 9.0$  Hz, 1 H), 7.60 (d,  $J = 7.0$  Hz, 1 H), 7.29 (d,  $J = 3.5$  Hz, 2 H), 7.05–

6.98 (m, 1 H), 6.94 (d,  $J = 8.3$  Hz, 1 H), 6.88 (d,  $J = 8.3$  Hz, 1 H), 6.58 (t,  $J = 6.7$  Hz, 1 H), 5.67 (s, 1 H), 4.66 (dd,  $J = 13.0, 6.6$  Hz, 1 H), 4.22 (d,  $J = 5.7$  Hz, 1 H), 3.92 (s, 3 H), 2.02 (td,  $J = 13.0, 6.7$  Hz, 1 H), 1.78 (td,  $J = 15.7, 7.7$  Hz, 1 H), 1.66 (dd,  $J = 10.0, 5.3$  Hz, 1 H), 1.36–1.28 (m, 1 H), 1.26 (s, 3 H), 1.15 ppm (s, 3 H);  $^{13}\text{C}$  NMR (100 MHz,  $\text{CDCl}_3$ )  $\delta = 165.6, 151.5, 136.2, 132.3, 131.4, 129.5, 124.7, 123.5, 122.0, 119.7, 115.9, 115.2, 112.2, 110.2, 102.8, 81.2, 79.7, 50.9, 47.1, 38.2, 29.7, 28.5, 27.7$  ppm; HRMS (ESI): calcd for  $\text{C}_{23}\text{H}_{25}\text{BrNO}_4^+$  [ $\text{M} + \text{H}^+$ ] 458.0961, found 458.0964.

**Methyl 3-((3-bromo-4-hydroxyphenyl)(5,5-dimethyltetrahydrofuran-2-yl)methyl)**

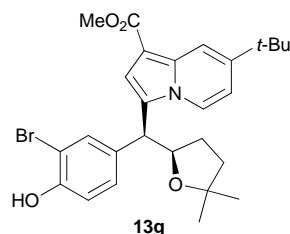

**-7-(tert-butyl)indolizine-1-carboxylate (13g):** obtained in 75% yield and >20:1 dr as a white solid; m.p. 210–212 °C; IR (film)  $\nu_{\text{max}}$  3321, 2987, 2922, 1655, 1540, 1259, 1231, 1059,

866, 748  $\text{cm}^{-1}$ ;  $^1\text{H}$  NMR (400 MHz,  $\text{CDCl}_3$ )  $\delta = 8.14$  (s, 1 H), 7.52 (d,  $J = 7.4$  Hz, 1 H), 7.31 (d,  $J = 1.5$  Hz, 1 H), 7.21 (s, 1 H), 6.94 (dd,  $J = 8.2, 1.7$  Hz, 1 H), 6.88 (d,  $J = 8.3$  Hz, 1 H), 6.65 (dd,  $J = 7.3, 1.7$  Hz, 1 H), 5.70 (s, 1 H), 4.66 (dd,  $J = 12.6, 6.7$  Hz, 1 H), 4.21 (d,  $J = 5.4$  Hz, 1 H), 3.91 (s, 3 H), 2.04 (td,  $J = 13.2, 7.0$  Hz, 1 H), 1.84–1.70 (m, 1 H), 1.70–1.58 (m, 1 H), 1.35–1.25 (m, 13 H), 1.14 ppm (s, 3 H);  $^{13}\text{C}$  NMR (100 MHz,  $\text{CDCl}_3$ )  $\delta = 165.7, 151.5, 146.1, 136.7, 132.4, 131.6, 129.6, 123.8, 123.0, 115.8, 114.9, 114.1, 111.7, 110.2, 101.7, 81.1, 79.6, 50.8, 46.9, 38.2, 34.6, 30.5(3\text{C}), 29.5, 28.4, 27.7$  ppm; HRMS (ESI): calcd for  $\text{C}_{27}\text{H}_{33}\text{BrNO}_4^+$  [ $\text{M} + \text{H}^+$ ] 514.1587, found 514.1592.

**Methyl 3-((3-bromo-4-hydroxyphenyl)(5,5-dimethyltetrahydrofuran-2-yl)methyl)**

**pyrrolo[2,1-a]isoquinoline-1-carboxylate (13h):** obtained in 67% yield and >20:1 dr



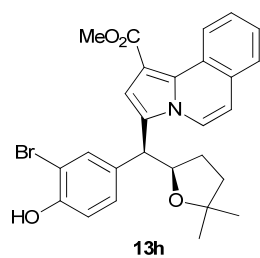

as a white solid; m.p. 144–146 °C; IR (film)  $\nu_{\max}$  2988, 2925, 1695, 1633, 1410, 1259, 1227, 1058, 744  $\text{cm}^{-1}$ ;  $^1\text{H}$  NMR (400 MHz,  $\text{CDCl}_3$ )  $\delta$  = 10.27 (d,  $J$  = 8.3 Hz, 1 H), 8.05–7.98 (m, 2 H), 7.91 (t,  $J$  = 7.7 Hz, 2 H), 7.75 (d,  $J$  = 1.6 Hz, 1 H), 7.71 (s, 1 H), 7.44–7.38 (m, 1 H), 7.32 (d,  $J$  = 8.4 Hz, 1 H), 7.26 (d,  $J$  = 7.4 Hz, 1 H), 5.88 (s, 1 H), 5.14 (dd,  $J$  = 12.6, 6.7 Hz, 1 H), 4.73 (d,  $J$  = 5.3 Hz, 1 H), 4.39 (s, 3 H), 2.50 (td,  $J$  = 13.1, 6.7 Hz, 1 H), 2.24 (dt,  $J$  = 15.5, 7.4 Hz, 1 H), 2.17–2.05 (m, 1 H), 1.74 (d,  $J$  = 8.8 Hz, 1 H), 1.71 (s, 3 H), 1.61 ppm (s, 3 H);  $^{13}\text{C}$  NMR (100 MHz,  $\text{CDCl}_3$ )  $\delta$  = 165.9, 151.4, 132.7, 132.3, 131.8, 129.7, 128.6, 127.5, 127.4, 127.0, 126.6, 125.9, 125.8, 121.6, 115.9, 115.5, 113.3, 110.3, 107.6, 81.2, 79.6, 51.4, 47.0, 38.2, 29.6, 28.4, 27.7 ppm; HRMS (ESI): calcd for  $\text{C}_{27}\text{H}_{27}\text{BrNO}_4^+$  [ $\text{M} + \text{H}^+$ ] 508.1118, found 508.1125.

**Methyl 3-((5,5-dimethyltetrahydrofuran-2-yl)(3-ethoxy-4-hydroxyphenyl)methyl)**

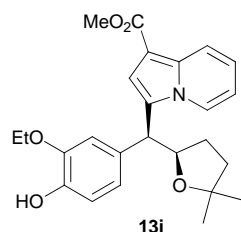

**indolizine-1-carboxylate (13i):** obtained in 63% yield and >20:1 dr as a white solid; m.p. 176–178 °C; IR (film)  $\nu_{\max}$  2971, 2925, 1692, 1663, 1510, 1259, 1227, 1128, 890, 740  $\text{cm}^{-1}$ ;  $^1\text{H}$  NMR (400 MHz,  $\text{CDCl}_3$ )  $\delta$  = 8.17 (d,  $J$  = 9.0 Hz, 1 H), 7.63 (d,  $J$  = 7.0 Hz, 1 H), 7.31 (s, 1 H), 7.03–6.93 (m, 1 H), 6.80 (d,  $J$  = 8.1 Hz, 1 H), 6.65 (d,  $J$  = 8.1 Hz, 1 H), 6.58 (s, 1 H), 6.54 (t,  $J$  = 6.8 Hz, 1 H), 5.61 (s, 1 H), 4.66 (dd,  $J$  = 13.4, 6.7 Hz, 1 H), 4.17 (d,  $J$  = 6.2 Hz, 1 H), 4.00 (dd,  $J$  = 16.0, 7.0 Hz, 2 H), 3.91 (s, 3 H), 1.95 (dt,  $J$  = 12.6, 6.6 Hz, 1 H), 1.88–1.75 (m, 1 H), 1.66 (dt,  $J$  = 12.3, 7.7 Hz, 1 H), 1.43–1.32 (m, 4 H), 1.27 (s, 3 H), 1.16 ppm (s, 3 H);  $^{13}\text{C}$  NMR (100 MHz,  $\text{CDCl}_3$ )  $\delta$  = 165.6, 145.8, 144.9, 136.1, 129.6, 125.6, 123.8, 121.7(2C), 119.6, 114.9, 114.1, 111.9(2C), 102.6, 81.1,

79.9, 64.4, 50.8, 48.2, 38.2, 30.0, 28.7, 27.9, 14.7 ppm; HRMS (ESI): calcd for  $C_{25}H_{30}NO_5^+$   $[M + H^+]$  424.2118, found 424.2116.

**Methyl 3-((5,5-dimethyltetrahydrofuran-2-yl)(3-ethoxy-4-hydroxyphenyl)methyl)**

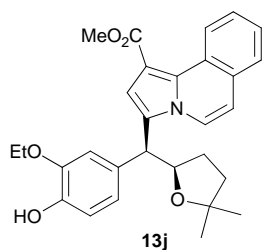

**pyrrolo[2,1-a]isoquinoline-1-carboxylate (13j):** obtained in

55% yield and >20:1 dr as a white solid; m.p. 220–222 °C; IR

(film)  $\nu_{\max}$  2991, 2875, 1676, 1310, 1254, 1217, 1058, 748

$cm^{-1}$ ;  $^1H$  NMR (400 MHz,  $CDCl_3$ )  $\delta$  = 9.84 (d,  $J$  = 8.3 Hz, 1 H),

7.55 (dd,  $J$  = 15.0, 8.5 Hz, 3 H), 7.45 (t,  $J$  = 7.4 Hz, 1 H), 7.29 (s, 1 H), 6.79 (t,  $J$  = 8.3

Hz, 2 H), 6.72–6.58 (m, 2 H), 5.58 (s, 1 H), 4.70 (dd,  $J$  = 13.1, 6.5 Hz, 1 H), 4.25 (d,  $J$

= 5.8 Hz, 1 H), 4.09–3.82 (m, 5 H), 2.00 (td,  $J$  = 12.9, 6.5 Hz, 1 H), 1.85 (td,  $J$  = 15.7,

7.9 Hz, 1 H), 1.74–1.61 (m, 1 H), 1.36 (t,  $J$  = 6.9 Hz, 4 H), 1.29 (s, 3 H), 1.18 ppm (s,

3 H);  $^{13}C$  NMR (100 MHz,  $CDCl_3$ )  $\delta$  = 166.0, 145.7, 144.9, 132.5, 130.0, 128.6,

127.3(2C), 126.9(2C), 126.5, 125.8, 121.9, 121.8, 115.2, 114.1, 113.0, 112.1, 107.4,

81.0, 79.9, 64.4, 51.3, 48.1, 38.2, 30.0, 28.7, 27.8, 14.8 ppm; HRMS (ESI): calcd for

$C_{29}H_{32}NO_5^+$   $[M + H^+]$  474.2275, found 474.2278.

## Synthetic application of indole derivative **2a**

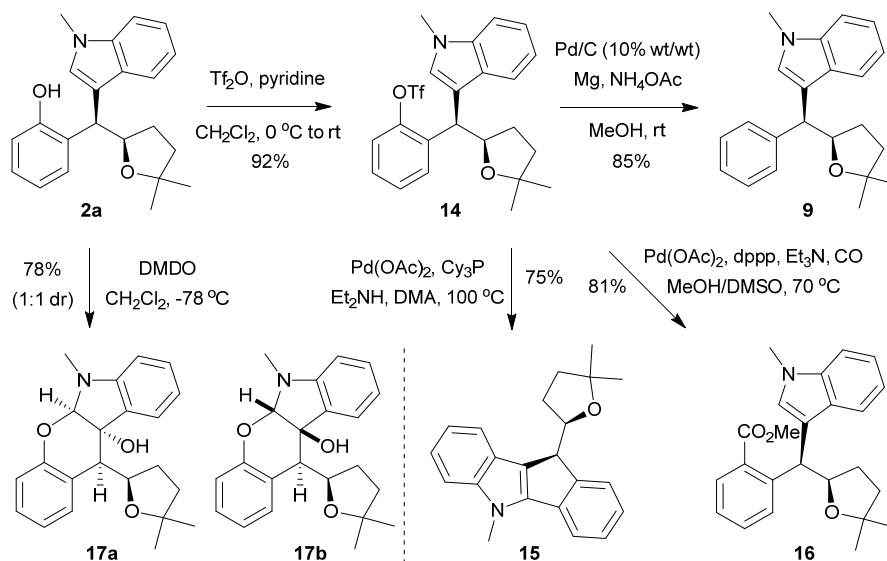

**Preparation of triflate **14**:** To a stirred solution of indole **2a** (335 mg, 1.0 mmol) in  $\text{CH}_2\text{Cl}_2$  (5 mL) at  $0\text{ }^\circ\text{C}$  were added pyridine (0.19 mL, 2.4 mmol) and  $\text{Tf}_2\text{O}$  (0.20 mL, 1.2 mmol). The resulting mixture was warmed to room temperature and stirred for further 1 h before it was quenched with  $\text{NH}_4\text{Cl}$  (sat. aq., 10 mL). The layers were separated, and the aqueous layer was extracted with  $\text{CH}_2\text{Cl}_2$  ( $3 \times 5\text{ mL}$ ). The combined organic layers were dried ( $\text{Na}_2\text{SO}_4$ ) and concentrated *in vacuo*. Flash column chromatography (silica gel, hexanes: $\text{EtOAc}$  10:1) afforded triflate **14** (430 mg, 92%) as a colorless oil.

### 2-((5,5-Dimethyltetrahydrofuran-2-yl)(1-methyl-1*H*-indol-3-yl)methyl)phenyl

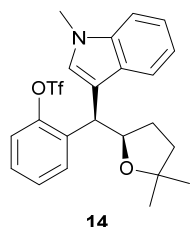

**trifluoromethanesulfonate (**14**):** IR (film)  $\nu_{\text{max}}$  2970, 2875, 1481, 1416, 1211, 1141, 1070, 891, 766, 739  $\text{cm}^{-1}$ ;  $^1\text{H}$  NMR (400 MHz,  $\text{CDCl}_3$ )  $\delta$  = 7.56 (dd,  $J$  = 6.4, 2.8 Hz, 1 H), 7.44 (d,  $J$  = 8.0 Hz, 1 H),

7.25–7.18 (m, 5 H), 7.15 (t,  $J$  = 7.5 Hz, 1 H), 7.00 (t,  $J$  = 7.5 Hz, 1 H), 4.70 (d,  $J$  = 6.3 Hz, 1 H), 4.61 (dd,  $J$  = 14.2, 6.4 Hz, 1 H), 3.76 (s, 3 H), 1.93–1.84 (m, 1 H), 1.84–

1.73 (m, 1 H), 1.72–1.56 (m, 2 H), 1.25 (s, 3 H), 1.20 ppm (s, 3 H);  $^{13}\text{C}$  NMR (100 MHz,  $\text{CDCl}_3$ )  $\delta$  = 147.4, 136.7, 136.5, 131.2, 128.2, 128.0, 127.9, 127.8, 121.4, 120.9, 119.5, 118.8, 118.6 ( $J_{\text{C-F}}$  = 318 Hz), 113.6, 108.9, 81.5, 81.2, 40.9, 38.2, 32.8, 30.6, 28.9, 28.3 ppm; HRMS (ESI): calcd for  $\text{C}_{23}\text{H}_{25}\text{F}_3\text{NO}_4\text{S}^+$  [ $\text{M} + \text{H}^+$ ] 468.1451, found 468.1453.

**Synthesis of indole 9:**<sup>5</sup> To a stirred solution of triflate **14** (46.7 mg, 0.1 mmol) in MeOH (1 mL) at room temperature were added Pd/C (5 mg, 10% wt/wt), magnesium metal (3 mg, 0.12 mmol) and ammonium acetate (7.8 mg, 0.1 mmol). The resulting mixture was stirred for 5 h before it was filtered through a short pad of celite. The filtrate was concentrated *in vacuo*. Flash column chromatography (silica gel, hexanes:EtOAc 1:1) afforded **9** (27 mg, 85%) as a white solid.

**3-((5,5-Dimethyltetrahydrofuran-2-yl)(phenyl)methyl)-1-methyl-1H-indole (9):**

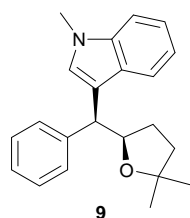

m.p. 108–110 °C; IR (film)  $\nu_{\text{max}}$  2967, 2929, 2863, 1467, 1366, 1143, 1052, 906, 739, 703  $\text{cm}^{-1}$ ;  $^1\text{H}$  NMR (400 MHz,  $\text{CDCl}_3$ )  $\delta$  = 7.28 (t,  $J$  = 6.3 Hz, 2 H), 7.26–7.18 (m, 4 H), 7.18–7.07 (m, 3 H), 6.92 (t,  $J$  = 7.4

Hz, 1 H), 4.61 (q,  $J$  = 7.1 Hz, 1 H), 4.28 (d,  $J$  = 7.1 Hz, 1 H), 3.77 (s, 3 H), 1.76 (dq,  $J$  = 12.4, 7.5 Hz, 2 H), 1.64 (dt,  $J$  = 12.0, 7.9 Hz, 1 H), 1.54–1.45 (m, 1 H), 1.27 (s, 3 H), 1.20 ppm (s, 3 H);  $^{13}\text{C}$  NMR (100 MHz,  $\text{CDCl}_3$ )  $\delta$  = 142.9, 136.9, 129.0(2C), 128.1, 128.0(2C), 126.9, 126.1, 121.2, 119.8, 118.4, 115.9, 108.8, 81.4, 81.0, 48.6, 38.3, 32.7, 30.7, 29.0, 28.2 ppm; HRMS (ESI): calcd for  $\text{C}_{22}\text{H}_{26}\text{NO}^+$  [ $\text{M} + \text{H}^+$ ] 320.2009, found 320.2012.

**Synthesis of tetracycle 15.**<sup>6</sup> To a stirred solution of triflate **14** (46.7 mg, 0.1 mmol) in *N,N*-dimethylacetamide (1 mL) were added Pd(OAc)<sub>2</sub> (2.0 mg, 0.01 mmol), Cy<sub>3</sub>P (5.6 mg, 0.02 mmol) and Et<sub>2</sub>NH (20.6 μL, 0.2 mmol). The resulting mixture was stirred at 100 °C for 5 h before it was cooled to room temperature and concentrated in *in vacuo*. Flash column chromatography (silica gel, hexanes:EtOAc 10:1) afforded tetracycle **15** (28 mg, 75%) as a white solid.

**10-(5,5-Dimethyltetrahydrofuran-2-yl)-5-methyl-5,10-dihydroindeno[1,2-b]-indol**

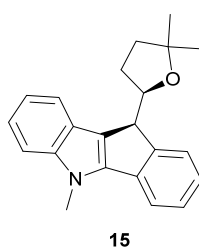

**e (15):** m.p. 120–122 °C; IR (film)  $\nu_{\max}$  2961, 2926, 2856, 1462, 1261, 1134, 1049, 802, 745 cm<sup>-1</sup>; <sup>1</sup>H NMR (400 MHz, CDCl<sub>3</sub>)  $\delta$  = 7.79 (d, *J* = 7.5 Hz, 1 H), 7.71 (d, *J* = 7.8 Hz, 1 H), 7.63 (d, *J* = 7.5 Hz, 1 H), 7.36 (t, *J* = 8.2 Hz, 2 H), 7.25–7.12 (m, 3 H), 4.76 (dt, *J* = 11.9, 6.0 Hz, 1 H), 4.21 (d, *J* = 5.3 Hz, 1 H), 4.06 (s, 3 H), 1.64–1.55 (m, 2 H), 1.51–1.42 (m, 1 H), 1.40 (s, 3 H), 1.30 (s, 3 H), 1.16–1.05 ppm (m, 1 H); <sup>13</sup>C NMR (100 MHz, CDCl<sub>3</sub>)  $\delta$  = 148.9, 144.1, 142.0, 136.1, 127.1(2C), 124.5, 124.1, 122.04, 121.2, 119.6(2C), 117.5, 109.7, 81.1, 79.8, 46.9, 38.5, 31.1, 28.7, 27.6, 27.5 ppm; HRMS (ESI): calcd for C<sub>22</sub>H<sub>24</sub>NO<sup>+</sup> [*M* + H<sup>+</sup>] 318.1852, found 318.1853.

**Synthesis of ester 16.**<sup>7</sup> To a stirred solution of triflate **14** (46.7 mg, 0.1 mmol) in MeOH/DMSO (1.5 mL, 1:2) were added Pd(OAc)<sub>2</sub> (2.0 mg, 0.01 mmol), dppp (4.1 mg, 0.01 mmol) and Et<sub>3</sub>N (27.7 μL, 0.2 mmol). The resulting mixture was stirred under CO atmosphere at 70 °C for 12 h before it was cooled to room temperature and concentrated in *in vacuo*. Flash column chromatography (silica gel, hexanes:EtOAc 10:1) afforded ester **16** (31 mg, 81%) as a white solid.

**Methyl 2-((5,5-dimethyltetrahydrofuran-2-yl)(1-methyl-1*H*-indol-3-yl)methyl)-**

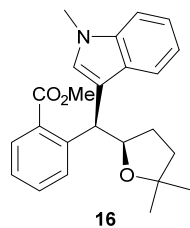

**benzoate (16):** m.p. 93–95 °C; IR (film)  $\nu_{\max}$  2929, 2868, 1750, 1373,

1237, 1134, 879, 741  $\text{cm}^{-1}$ ;  $^1\text{H}$  NMR (400 MHz,  $\text{CDCl}_3$ )  $\delta$  = 7.74 (d,

$J$  = 7.6 Hz, 1 H), 7.36 (dd,  $J$  = 15.0, 7.8 Hz, 2 H), 7.22 (dq,  $J$  = 14.5,

7.5 Hz, 4 H), 7.12 (t,  $J$  = 7.5 Hz, 1 H), 6.93 (t,  $J$  = 7.4 Hz, 1 H), 5.48 (d,  $J$  = 6.7 Hz, 1

H), 4.59 (q,  $J$  = 6.9 Hz, 1 H), 3.92 (s, 3 H), 3.77 (s, 3 H), 1.85–1.70 (m, 2 H), 1.69–

1.55 (m, 1 H), 1.55–1.45 (m, 1 H), 1.25 (s, 3 H), 1.17 ppm (s, 3 H);  $^{13}\text{C}$  NMR (100

MHz,  $\text{CDCl}_3$ )  $\delta$  = 169.3, 143.6, 136.8, 131.2(2C), 129.9, 129.5, 128.2, 127.3, 125.7,

121.2, 119.9, 118.5, 115.9, 108.7, 81.7, 81.1, 52.1, 42.4, 38.3, 32.8, 30.0, 28.8, 28.2

ppm; HRMS (ESI): calcd for  $\text{C}_{24}\text{H}_{28}\text{NO}_3^+$  [ $\text{M} + \text{H}^+$ ] 378.2064, found 378.2060.

**Synthesis of tetracycles 17a and 17b.**<sup>8</sup> To a stirred solution of indole **2a** (33.5 mg,

0.1 mmol) in  $\text{CH}_2\text{Cl}_2$  (2 mL) at  $-78$  °C was added a solution of DMDO in acetone

(0.06 M, 3.3 mL, 0.2 mmol). The resulting mixture was stirred for 1 h before it was

diluted with  $\text{CH}_2\text{Cl}_2$  (5 mL) and quenched with  $\text{H}_2\text{O}$  (5 mL). The layers were

separated, and the organic layer was washed with brine (10 mL). The organic layer

was dried ( $\text{Na}_2\text{SO}_4$ ) and concentrated *in vacuo*. Flash column chromatography (silica

gel, hexanes:EtOAc 80:1) afforded tetracycles **17a** and **17b** (78%, dr = 1:1) as

colorless oils.

**(5a,10b)-11-(5,5-Dimethyltetrahydrofuran-2-yl)-6-methyl-5a,6,10b,11-tetrahy-dr**

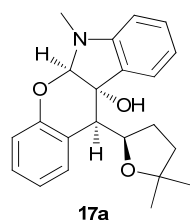

**ochromeno[2,3-*b*]indol-10b-ol (17a):** IR (film)  $\nu_{\max}$  2971, 2885,

1657, 1510, 1359, 1246, 1055, 890, 748  $\text{cm}^{-1}$ ;  $^1\text{H}$  NMR (400 MHz,

$\text{CDCl}_3$ )  $\delta$  = 7.45 (d,  $J$  = 7.3 Hz, 1 H), 7.10 (t,  $J$  = 7.4 Hz, 1 H), 6.98

(dd,  $J = 13.1, 7.7$  Hz, 2 H), 6.86 (t,  $J = 7.5$  Hz, 1 H), 6.78 (d,  $J = 7.5$  Hz, 1 H), 6.57 (t,  $J = 7.4$  Hz, 1 H), 6.15 (d,  $J = 7.8$  Hz, 1 H), 5.88 (s, 1 H), 5.47 (s, 1 H), 4.99–4.82 (m, 1 H), 3.20 (d,  $J = 10.5$  Hz, 1 H), 2.86 (s, 3 H), 2.61 (td,  $J = 11.5, 4.8$  Hz, 1 H), 1.93 (s, 3 H), 1.48 (s, 3 H), 1.45 ppm (s, 3 H);  $^{13}\text{C}$  NMR (100 MHz,  $\text{CDCl}_3$ )  $\delta = 154.5, 151.3, 129.3, 128.8, 127.4, 127.2, 125.3, 125.1, 122.8, 118.7, 116.9, 104.7, 103.8, 85.8, 82.6, 77.3, 48.5, 38.0, 33.0, 30.3, 28.8, 27.3$  ppm; HRMS (ESI): calcd for  $\text{C}_{22}\text{H}_{26}\text{NO}_3^+$  [ $\text{M} + \text{H}^+$ ] 352.1907, found 352.1912.

**(5a,10b)-11-(5,5-Dimethyltetrahydrofuran-2-yl)-6-methyl-5a,6,10b,11-tetrahydro-**

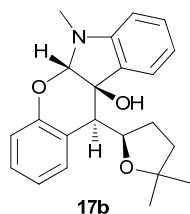

**ochromeno[2,3-*b*]indol-10b-ol (17b):** IR (film)  $\nu_{\text{max}}$  2979, 2897, 1657, 1599, 1501, 1344, 1242, 1151, 883, 741  $\text{cm}^{-1}$ ;  $^1\text{H}$  NMR (400 MHz,  $\text{CDCl}_3$ )  $\delta = 7.10$  (d,  $J = 7.2$  Hz, 1 H), 6.98 (dt,  $J = 12.6, 7.5$  Hz,

2 H), 6.87 (d,  $J = 6.7$  Hz, 1 H), 6.81 (d,  $J = 7.9$  Hz, 1 H), 6.75 (t,  $J = 7.3$  Hz, 1 H), 6.56 (t,  $J = 7.3$  Hz, 1 H), 6.50 (s, 1 H), 6.23 (d,  $J = 7.8$  Hz, 1 H), 5.57 (s, 1 H), 4.59 (dd,  $J = 14.3, 8.5$  Hz, 1 H), 3.27 (d,  $J = 9.8$  Hz, 1 H), 2.97 (s, 3 H), 1.89–1.61 (m, 4 H), 1.42 (s, 3 H), 1.33 ppm (s, 3 H);  $^{13}\text{C}$  NMR (100 MHz,  $\text{CDCl}_3$ )  $\delta = 153.9, 150.9, 131.3, 129.4, 129.2, 128.2, 126.7, 122.6, 122.3, 117.9, 117.6, 105.2, 101.2, 83.5, 83.2, 80.1, 51.2, 37.2, 32.6, 30.0, 29.3, 28.5$  ppm; HRMS (ESI): calcd for  $\text{C}_{22}\text{H}_{26}\text{NO}_3^+$  [ $\text{M} + \text{H}^+$ ] 352.1907, found 352.1910.

### III) References

- 1 (a) T. P. Pathak, K. M. Gligorich, B. E. Welm and M. S. Sigman, *J. Am. Chem. Soc.*, 2010, **132**, 7870; (b) K. H. Jensen, T. P. Pathak, Y. Zhang and M. S. Sigman, *J. Am. Chem. Soc.*, 2009, **131**, 17074; (c) D. C. Braddock, G. Cansell and S. A. Hermitage, *Chem. Commun.*, 2006, 2483.
- 2 (a) M.-L. Go, J. L. Leow, S. K. Gorla, A. P. Schuller, M. Wang and P. J. Casey, *J. Med. Chem.*, 2010, **53**, 6838; (b) I. N. Houpis, D. Shields, U. Nettekoven, A. Schnyder, E. Bappert, K. Weerts, M. Canters and W. Vermuelen, *Org. Process Res. Dev.*, 2009, **13**, 598.
- 3 (a) Y. Yang, K. Cheng and Y. Zhang, *Org. Lett.*, 2009, **11**, 5606; (b) D. Lapointe, T. Markiewicz, C. J. Whipp, A. Toderian and K. Fagnou, *J. Org. Chem.*, 2011, **76**, 749.
- 4 (a) A. W. J. Logan, J. S. Parker, M. S. Hallside and J. W. Burton, *Org. Lett.*, 2012, **14**, 2940; (b) S. Jautzel and R. Peters, *Angew. Chem. Int. Ed.*, 2008, **47**, 9284; (c) W. S. Johnson, L. Werthemann, W. R. Bartlett, T. J. Brocksom, T.-T. Li, D. J. Faulkner and M. R. Peterse, *J. Am. Chem. Soc.*, 1970, **92**, 741.
- 5 H. Sajiki, A. Mori, T. Mizusaki, T. Ikawa, T. Maegawa and K. Hirota, *Org. Lett.*, 2006, **8**, 987.
- 6 M. Shimizu, K. Mochida and T. Hiyama, *Angew. Chem. Int. Ed.*, 2008, **47**, 9760.
- 7 B. Liu, S.-F. Zhu, W. Zhang, C. Chen and Q.-L. Zhou, *J. Am. Chem. Soc.*, 2007, **129**, 5834
- 8 D. Schwaebisch, K. Tchabanenko, R. M. Adlington, A. M. Cowley and J. E. Baldwin, *Chem. Comm.*, 2004, 2552.



#### IV) $^1\text{H}$ and $^{13}\text{C}$ NMR Spectra of Compounds

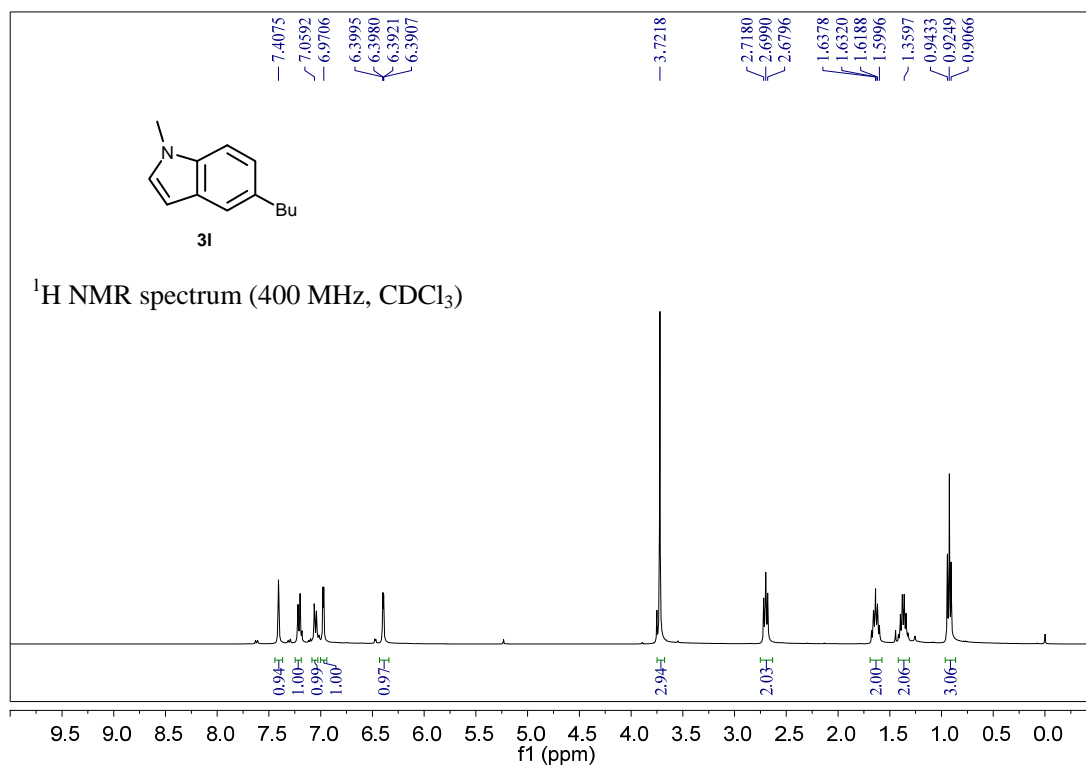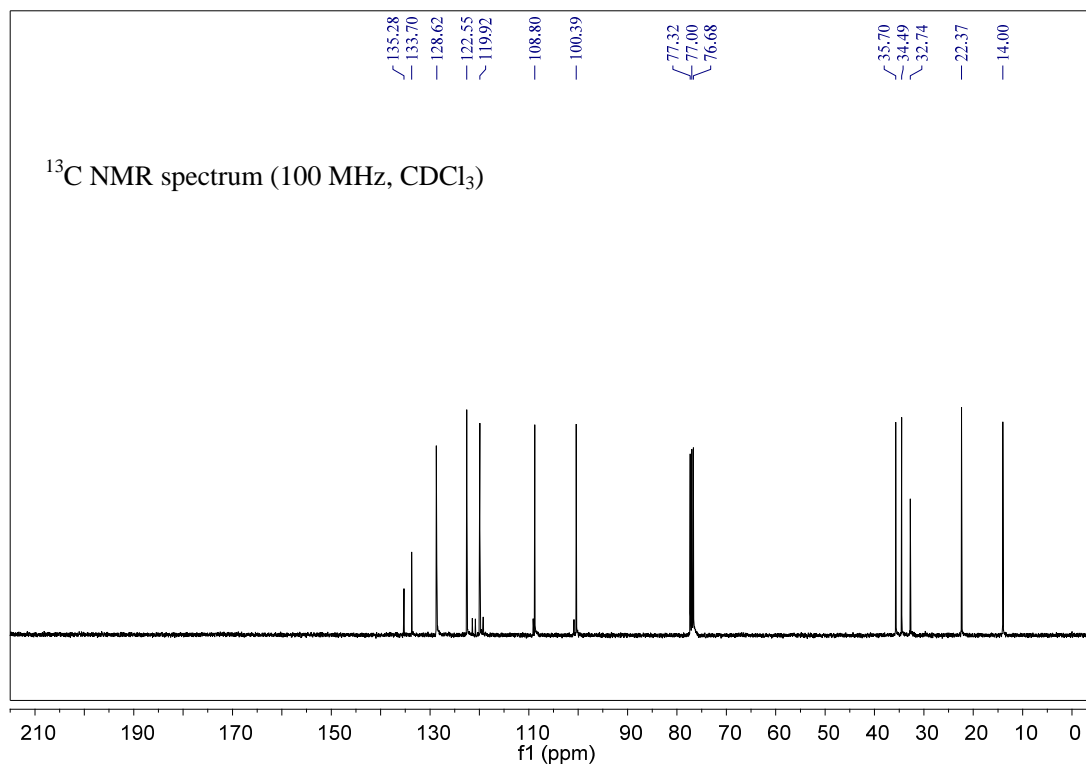

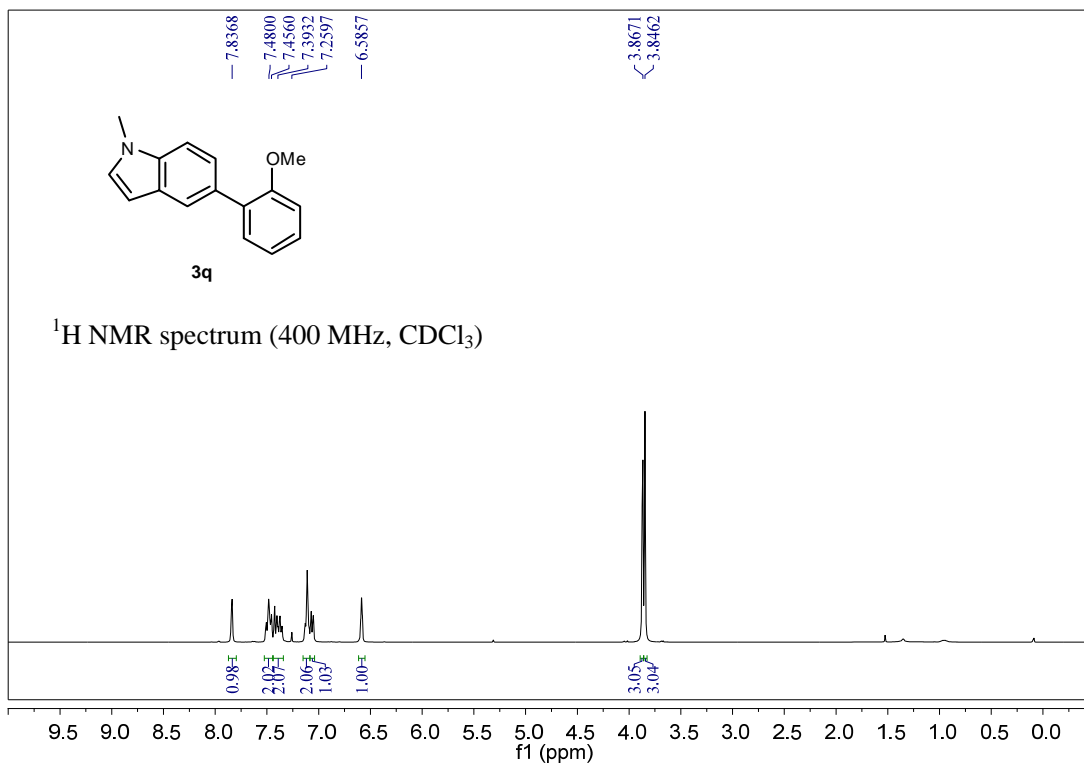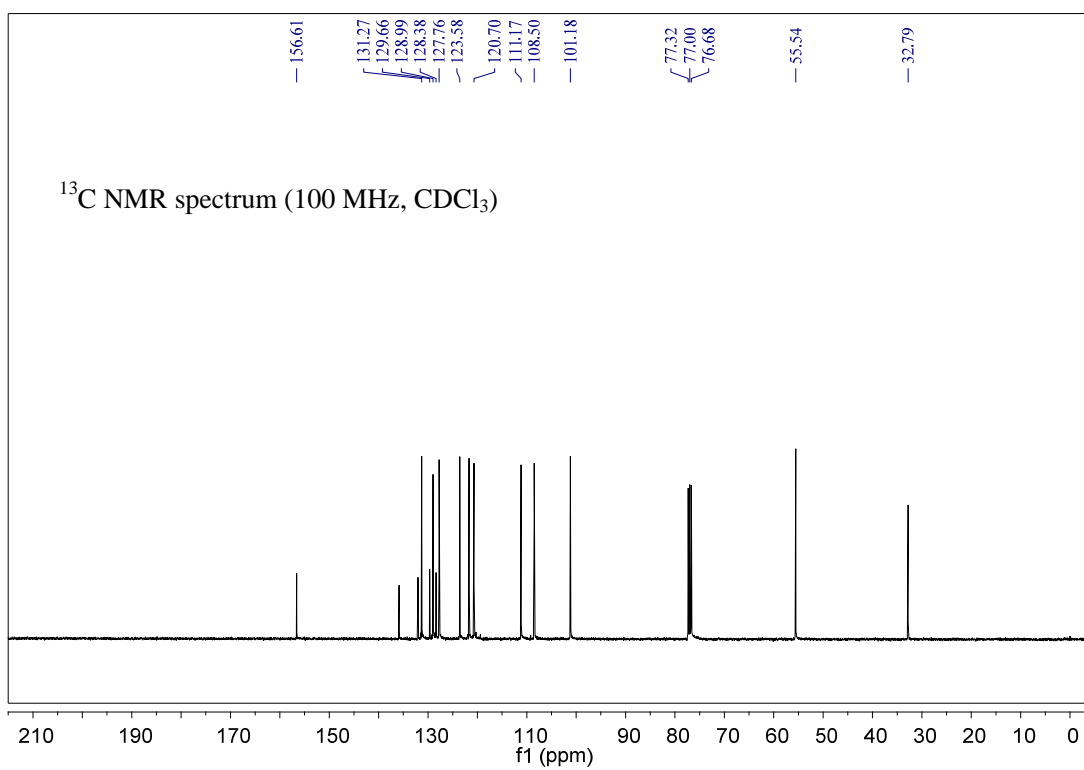

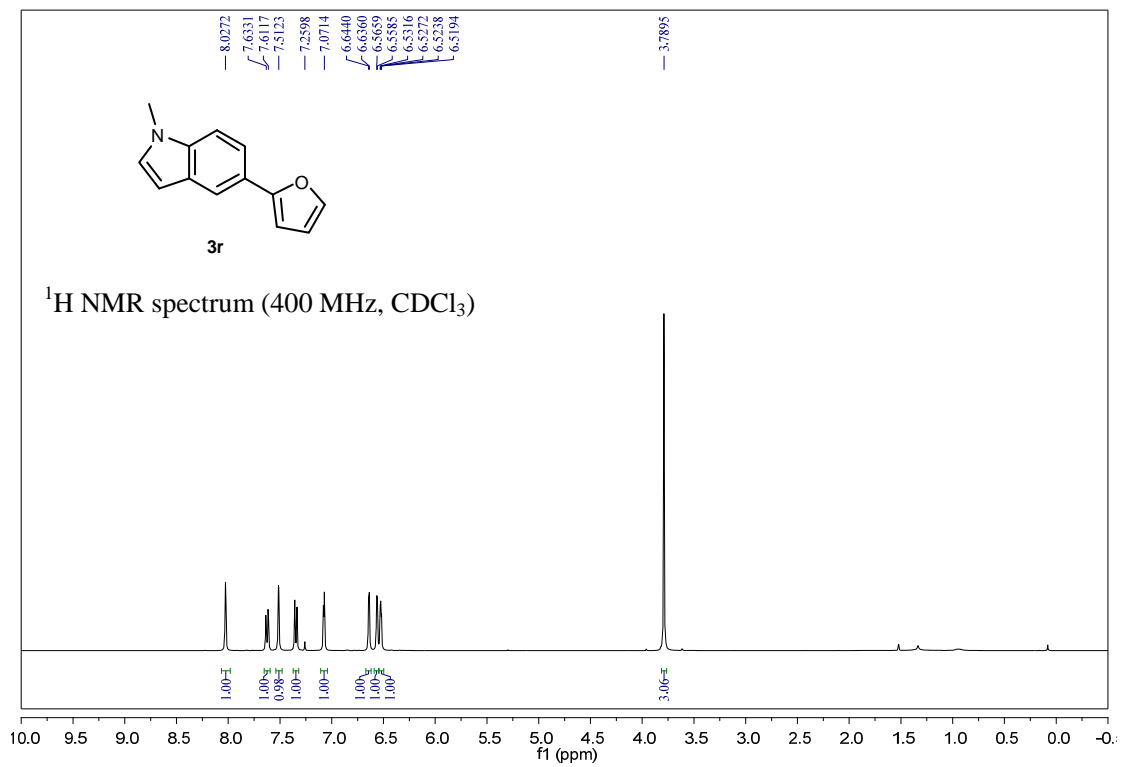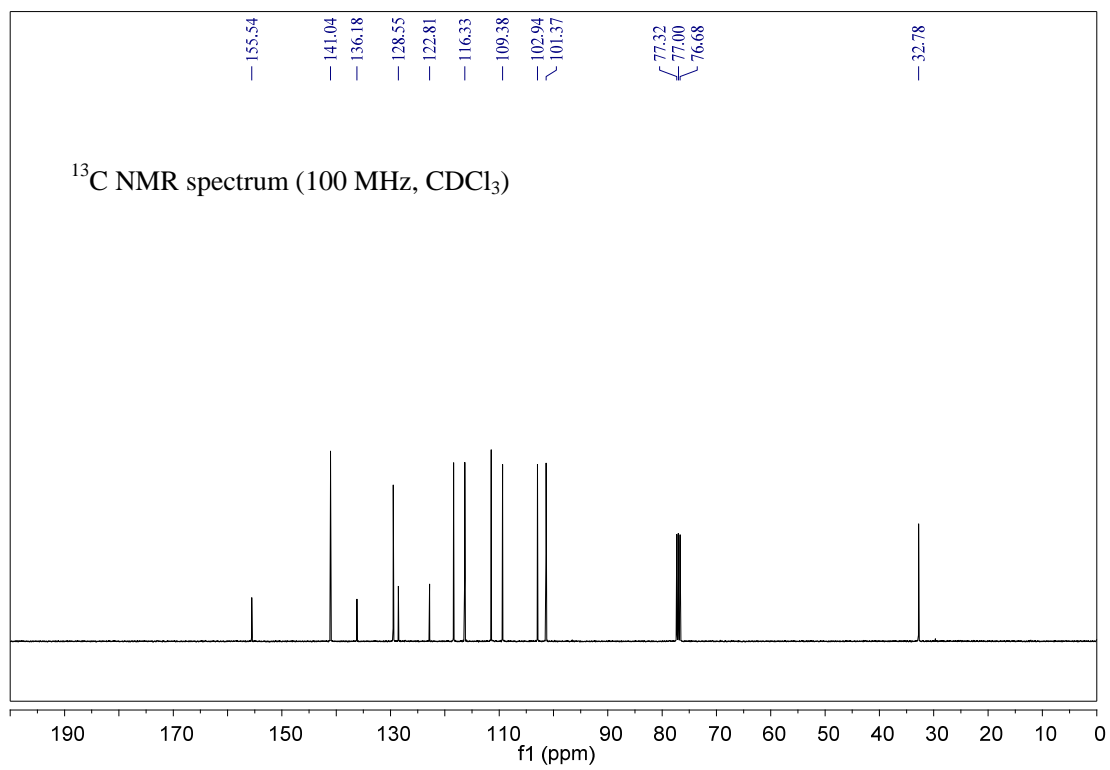

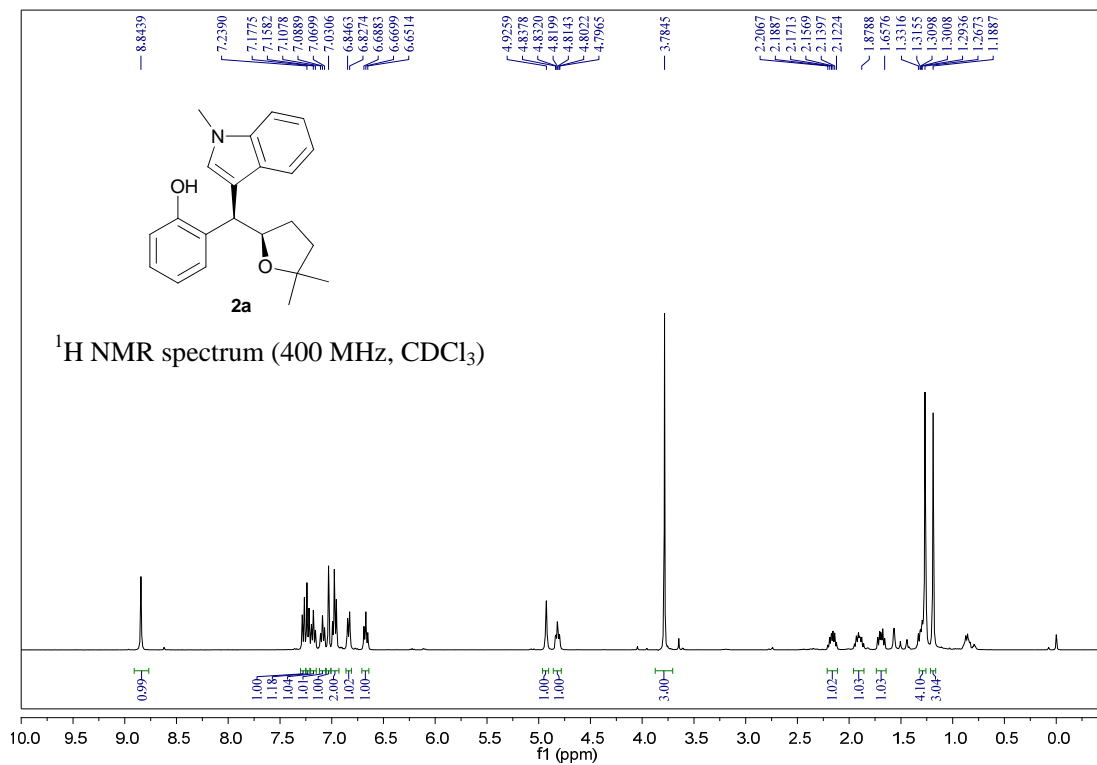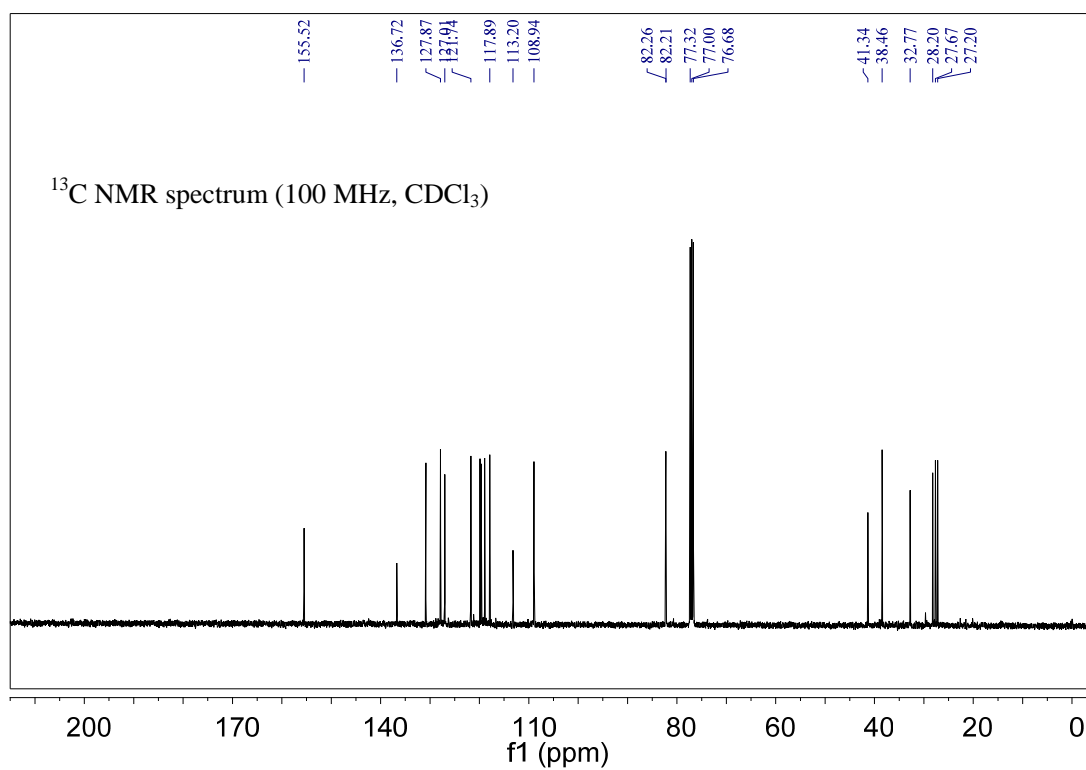

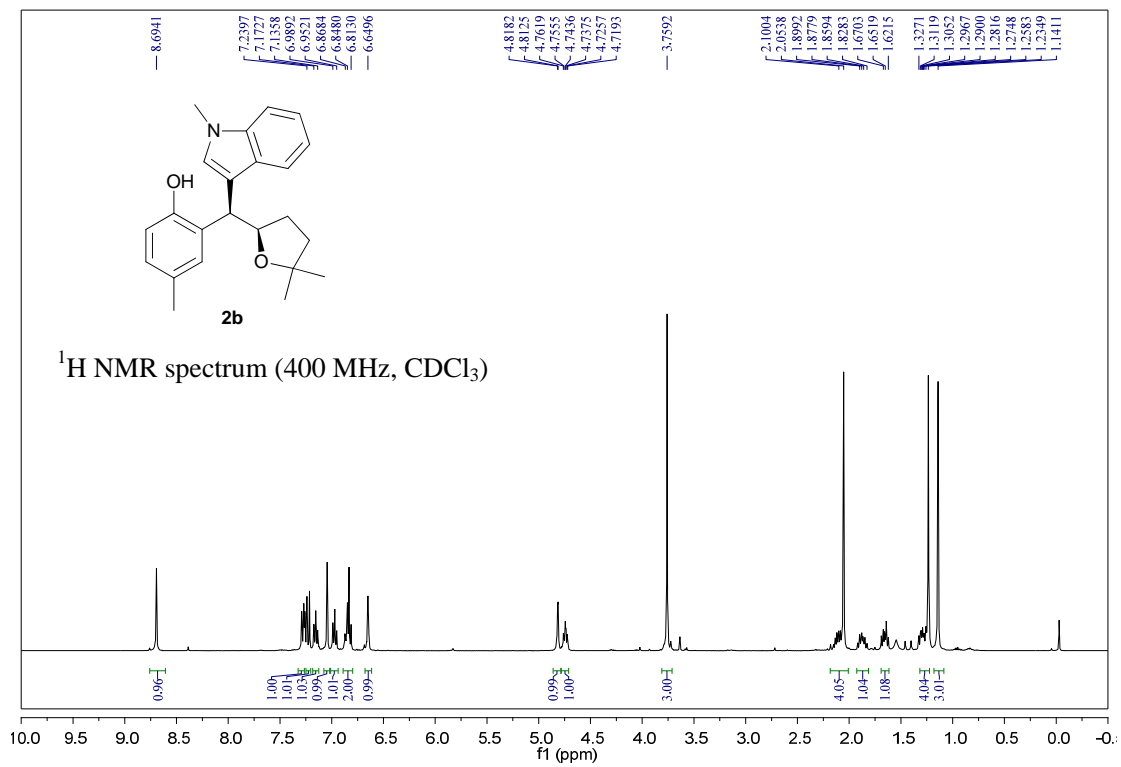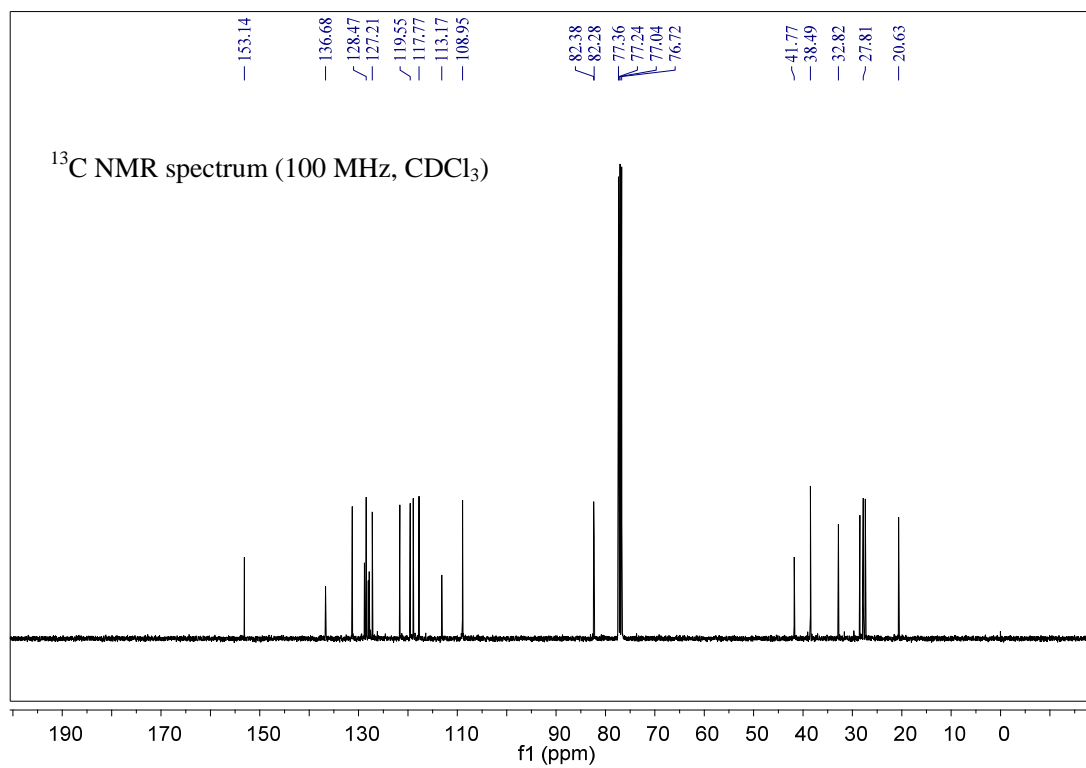

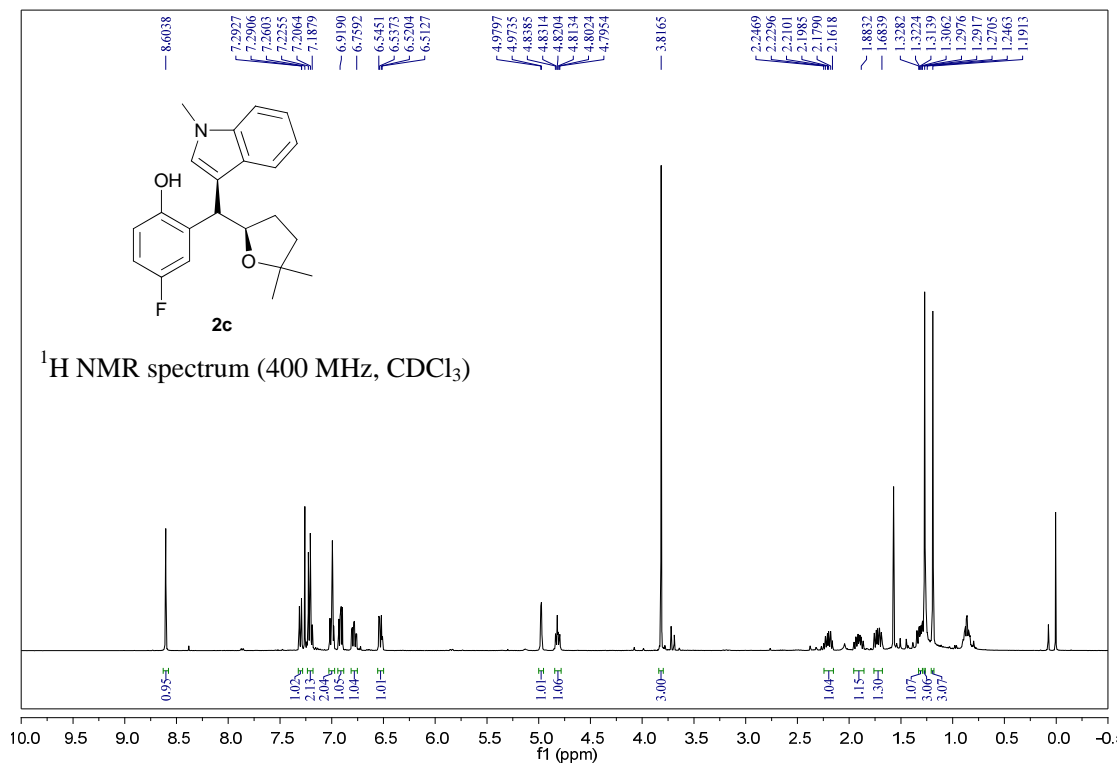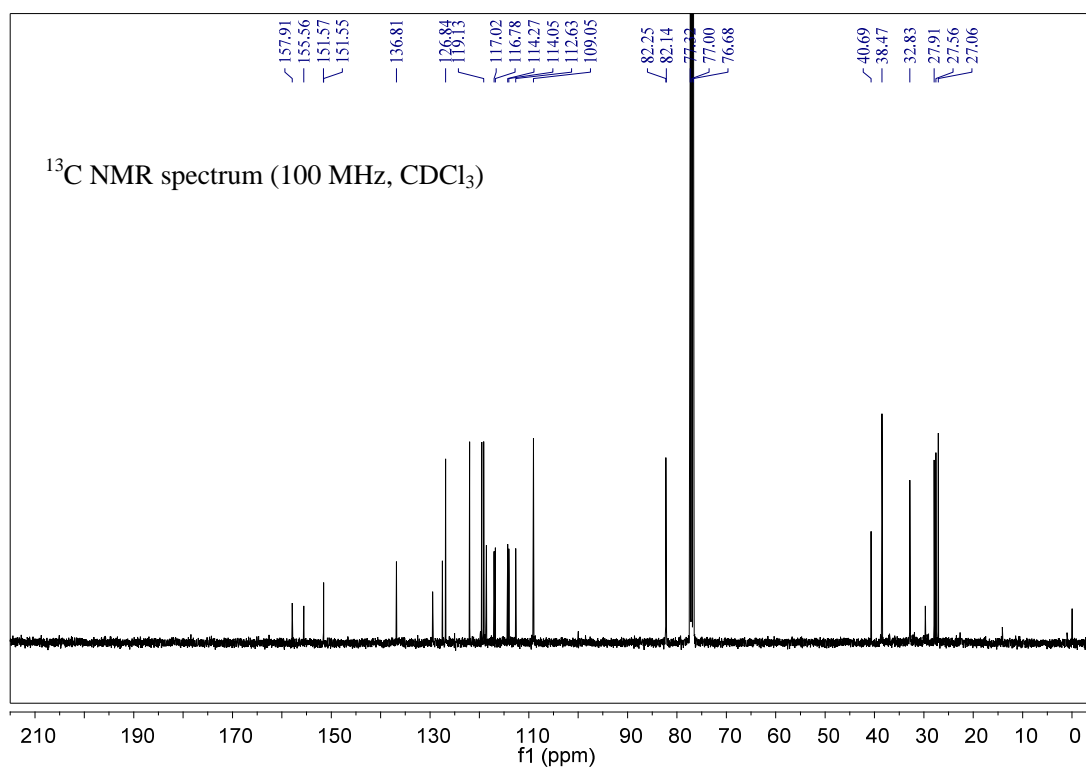

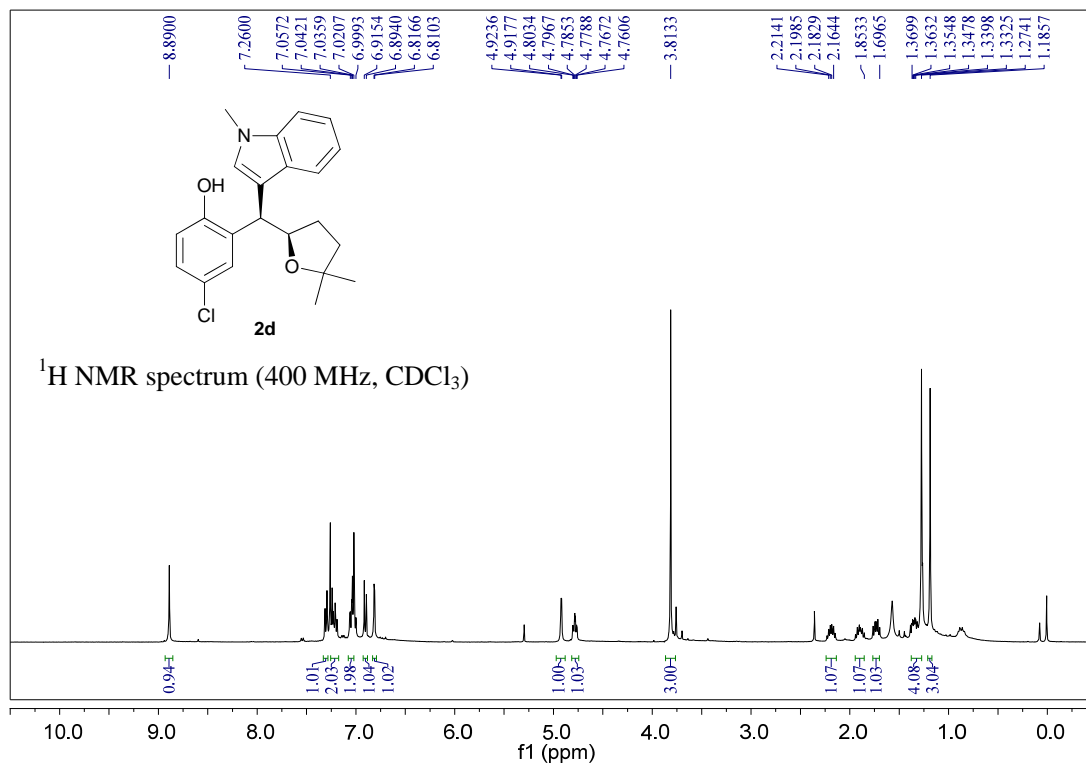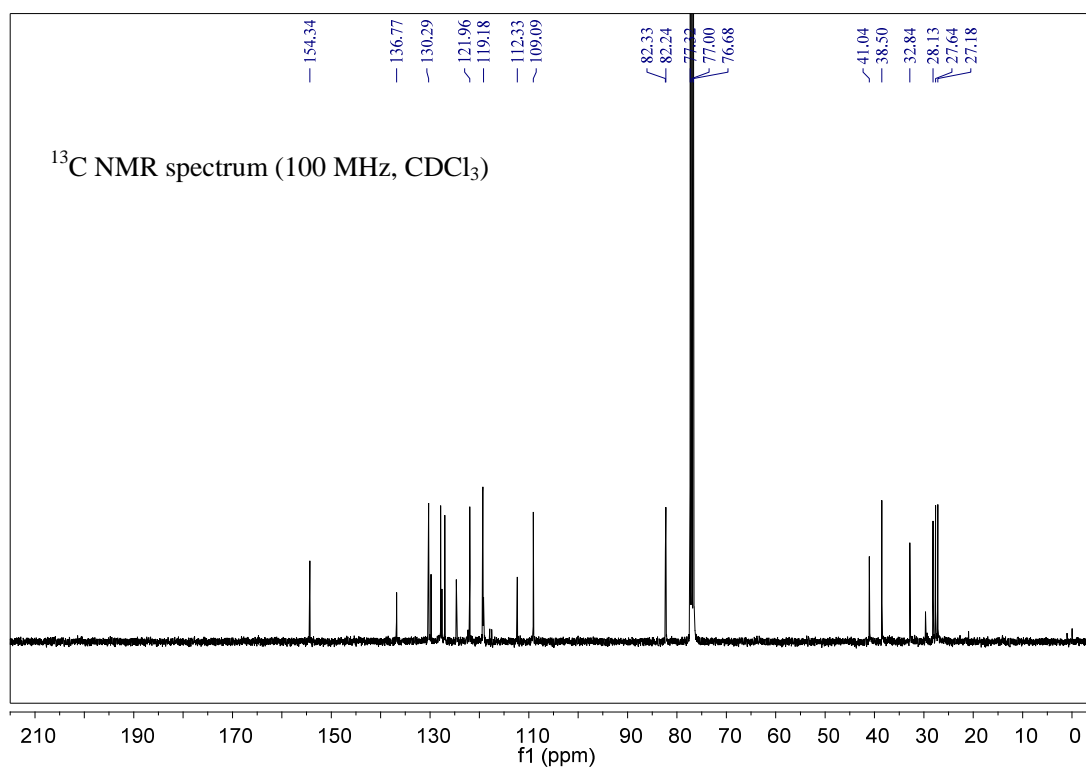

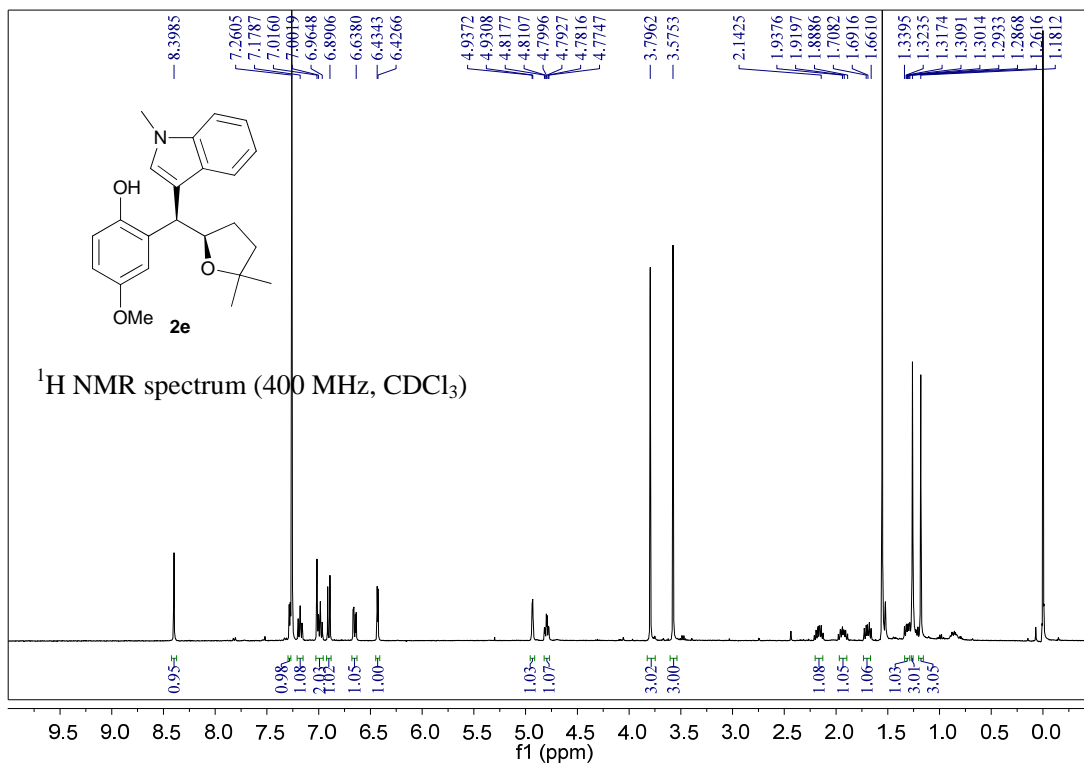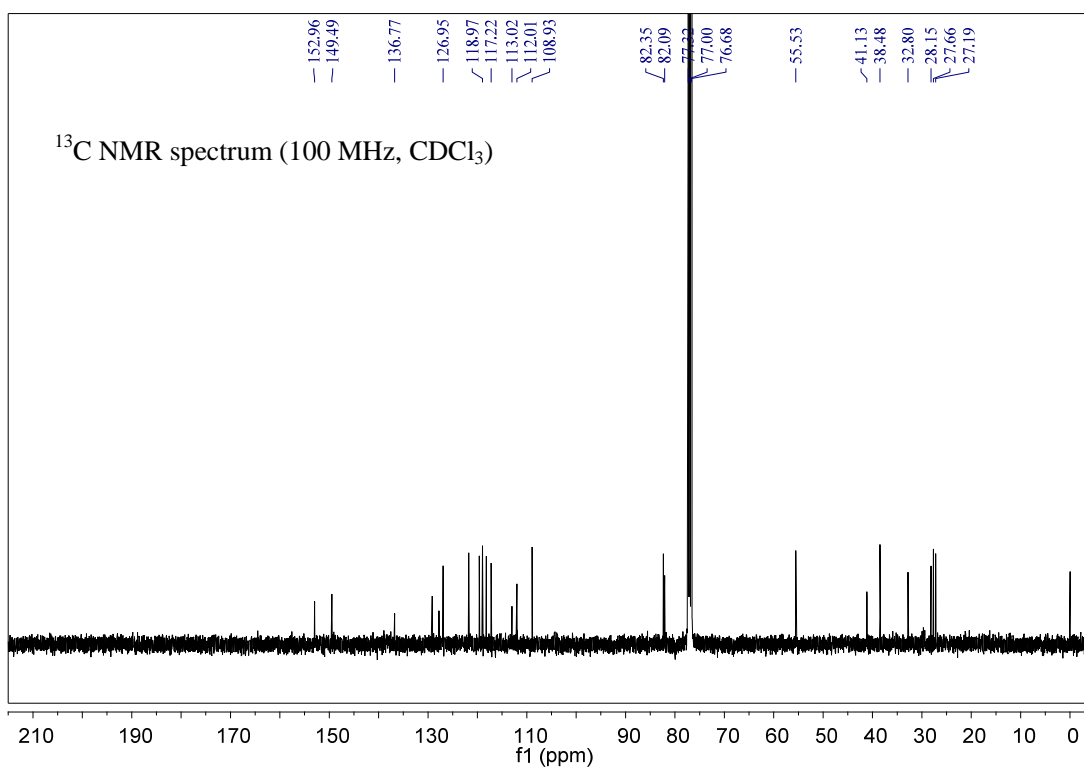



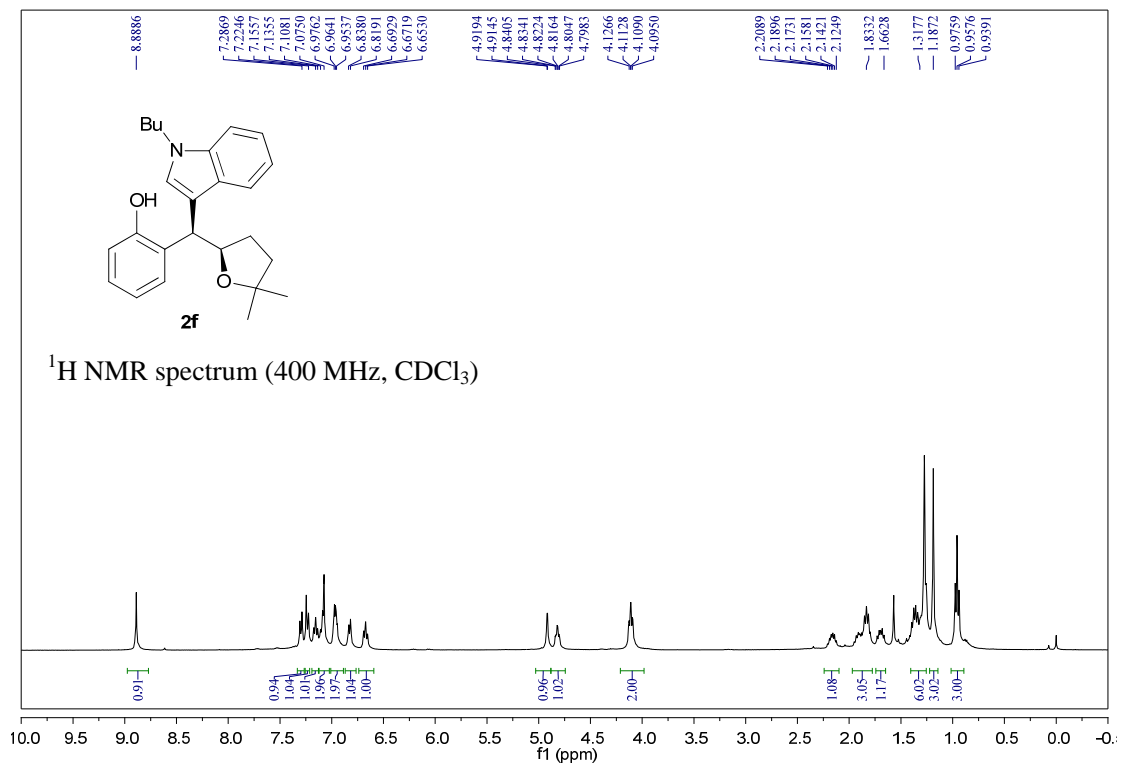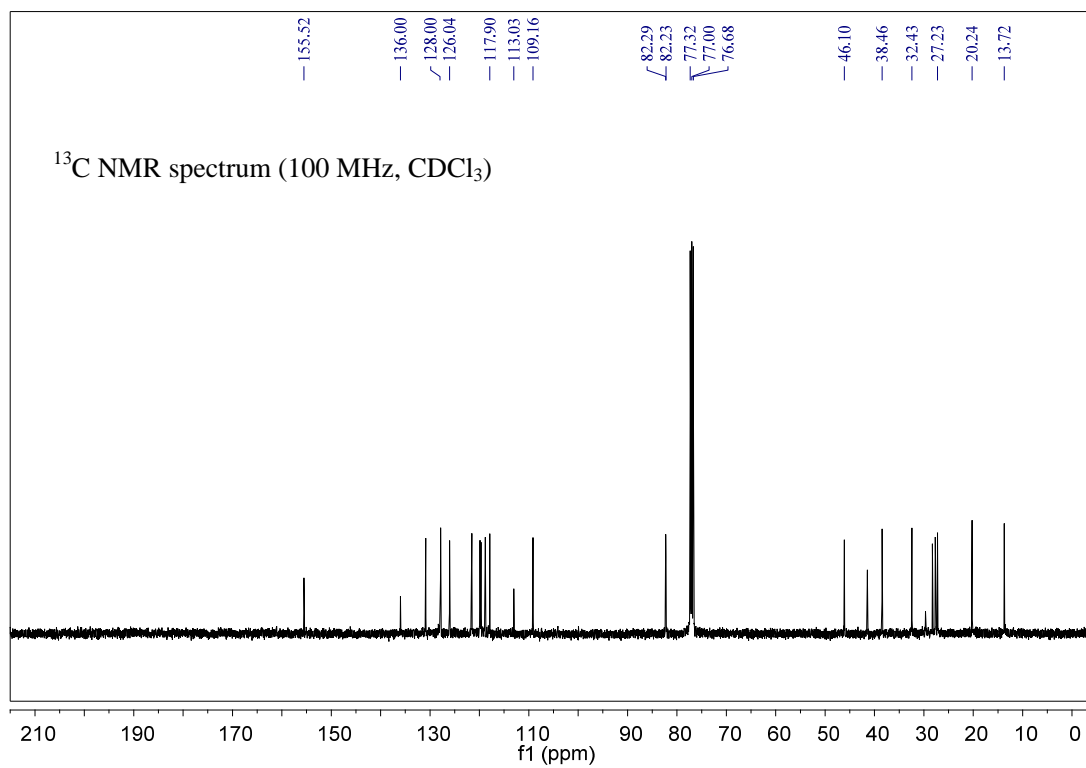

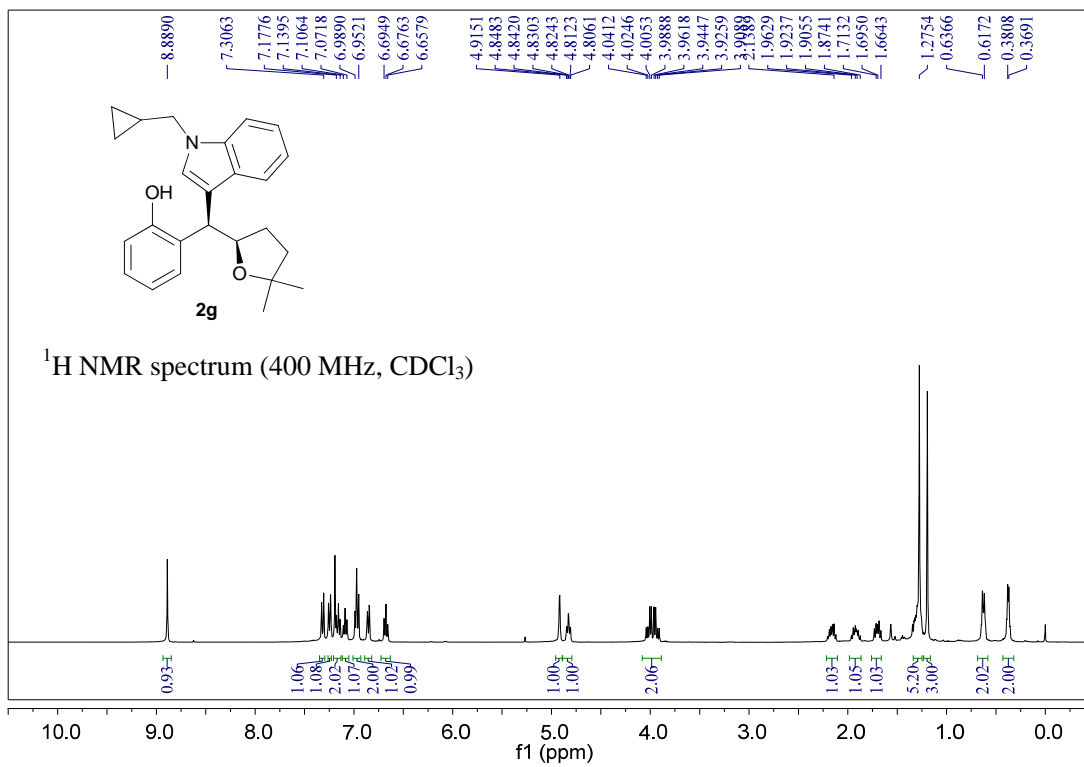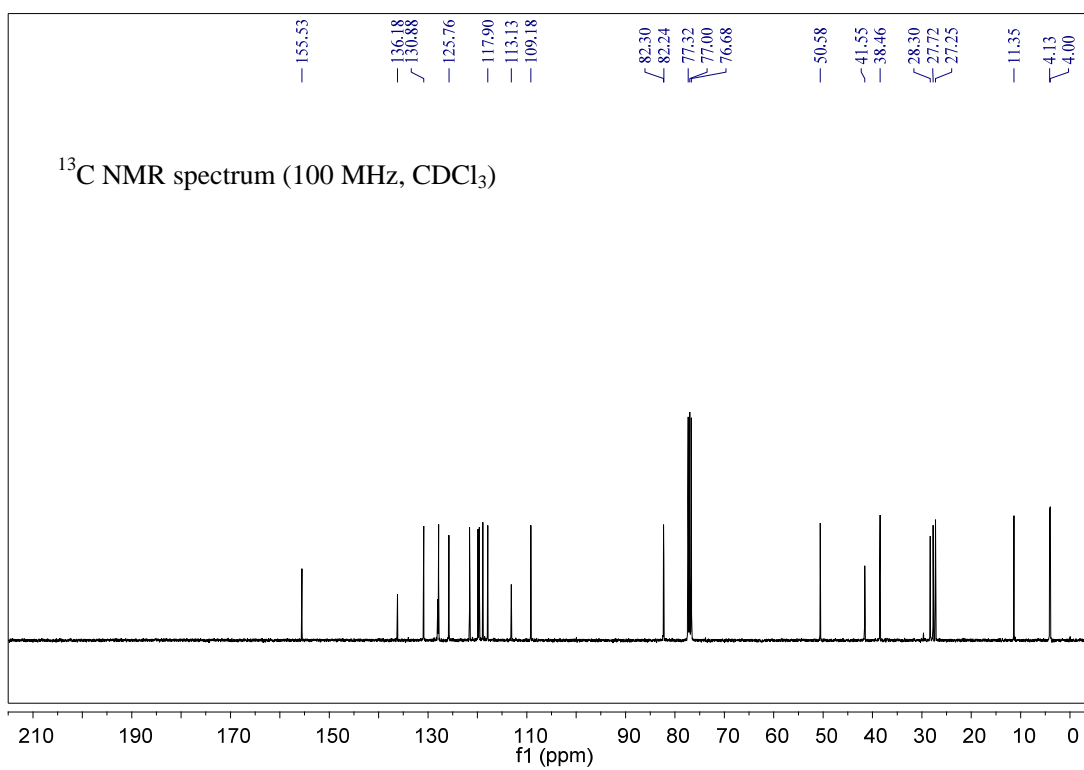

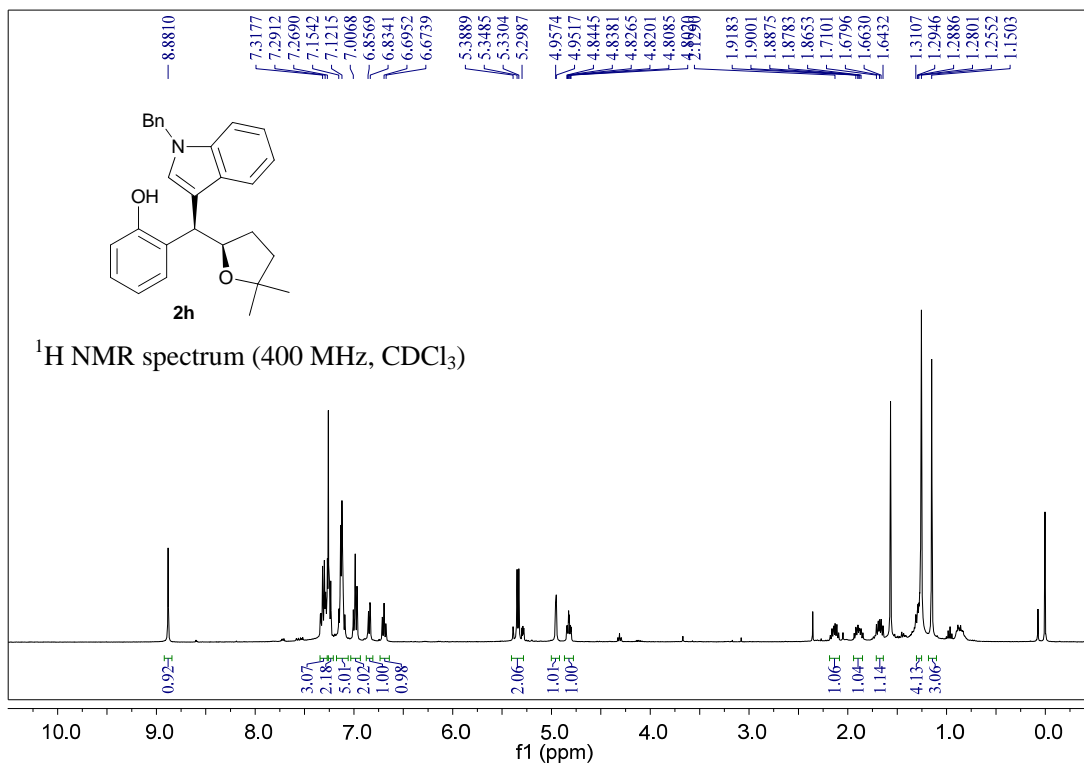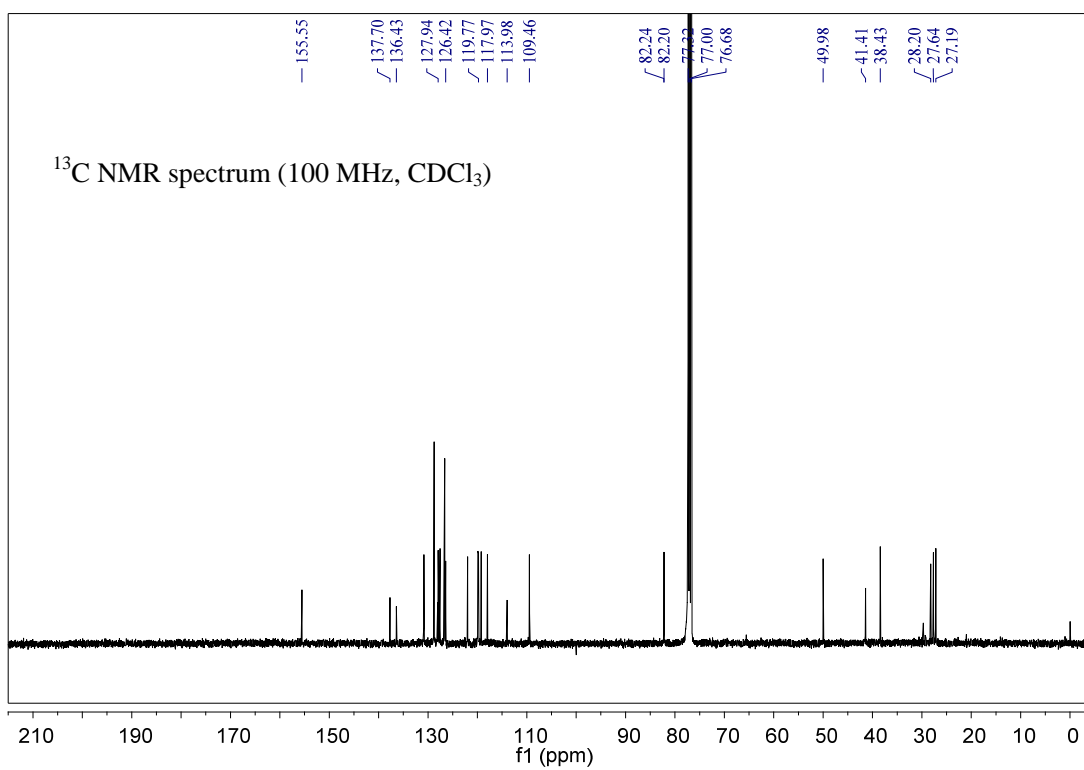

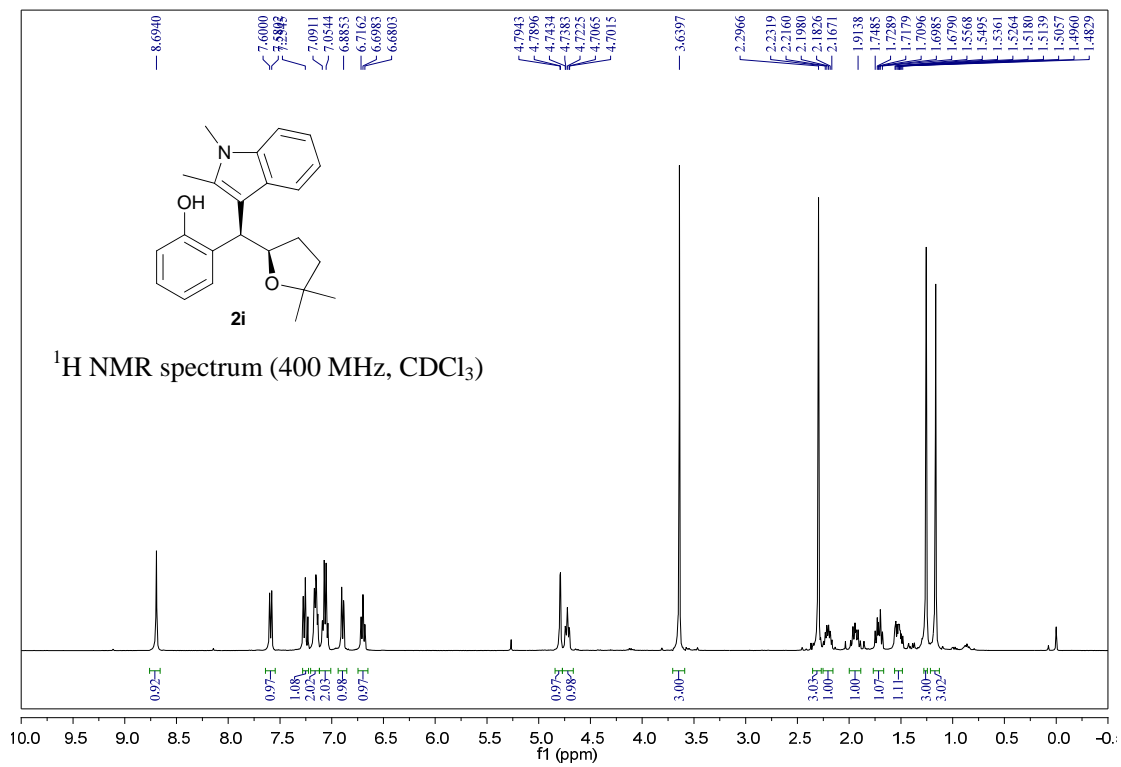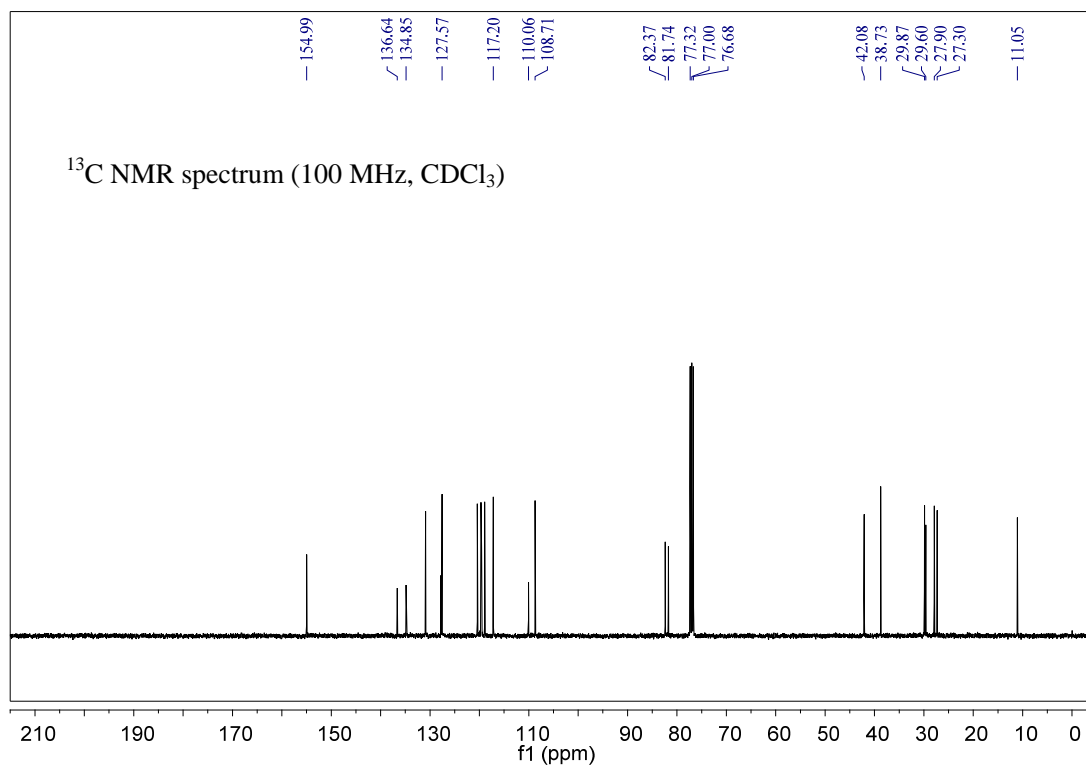

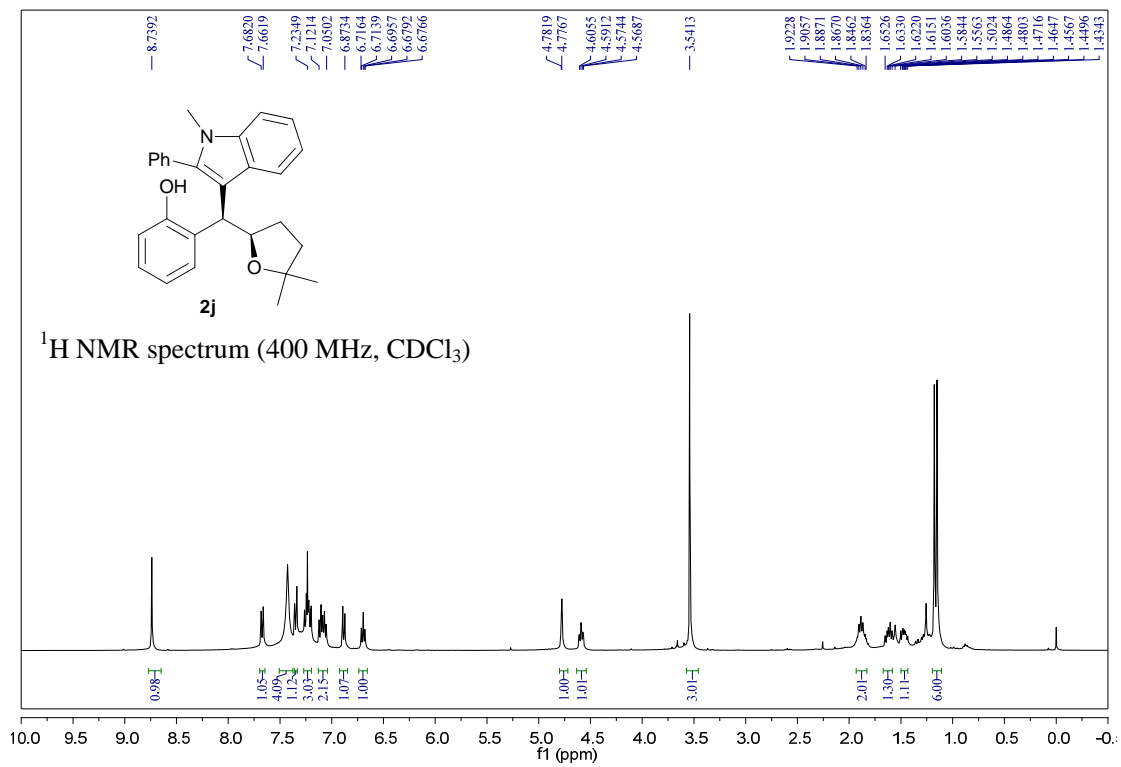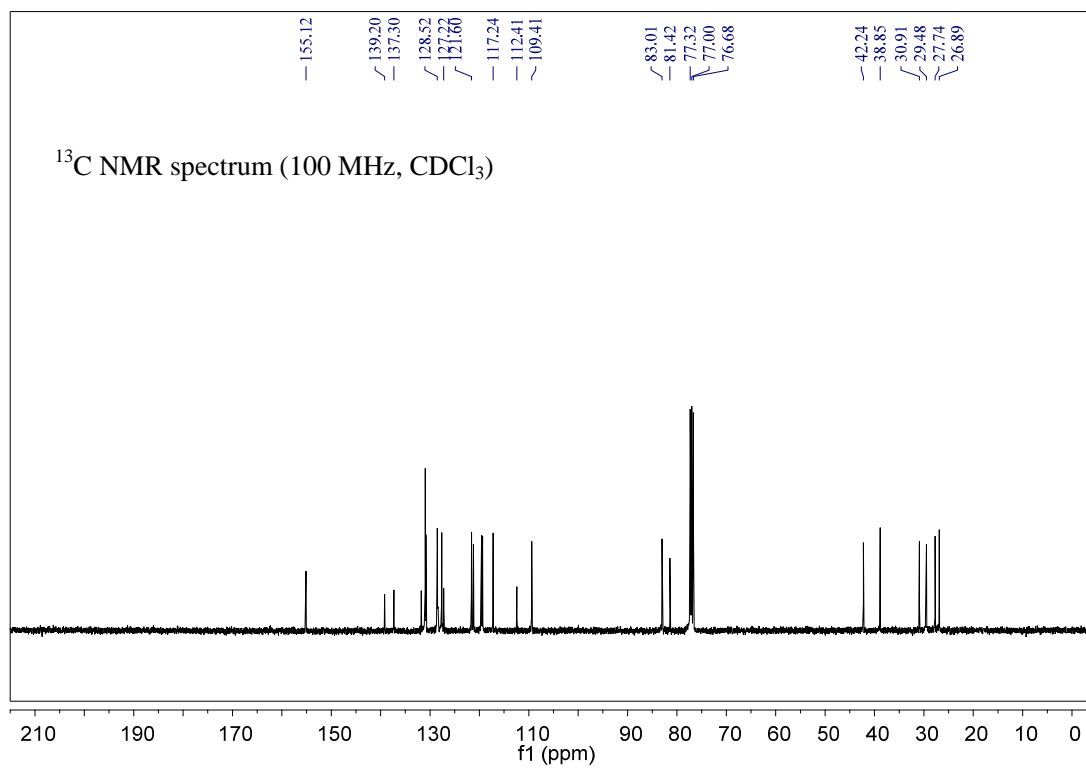

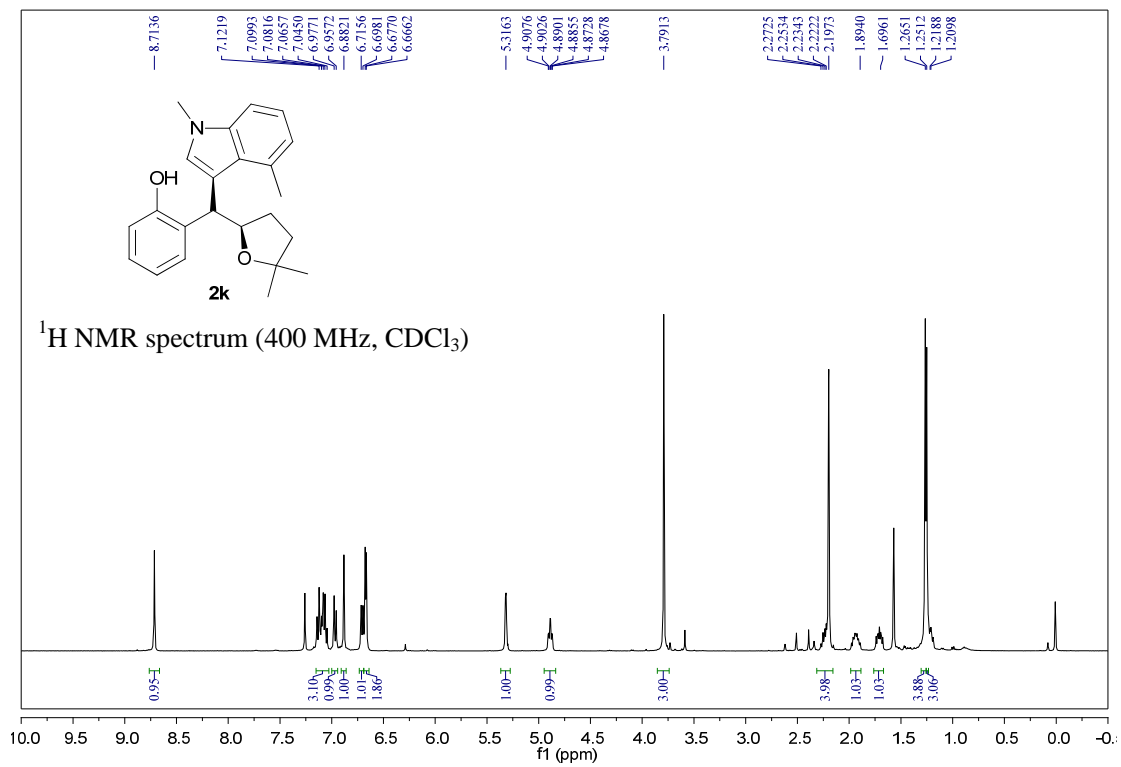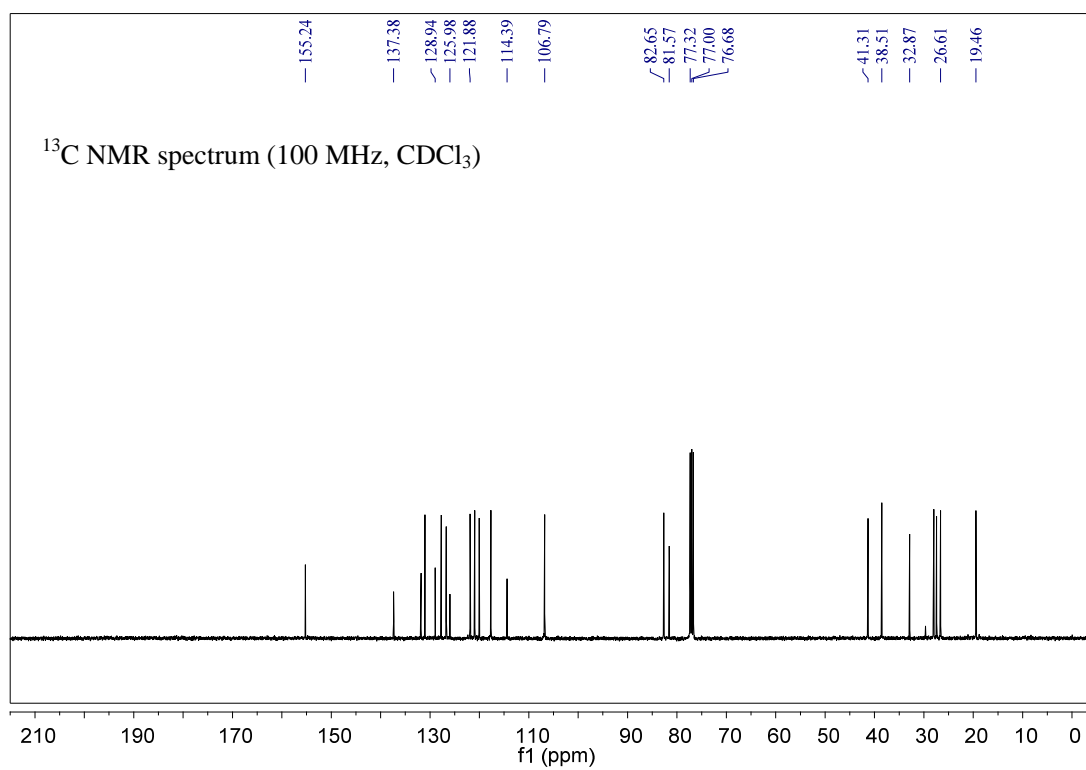

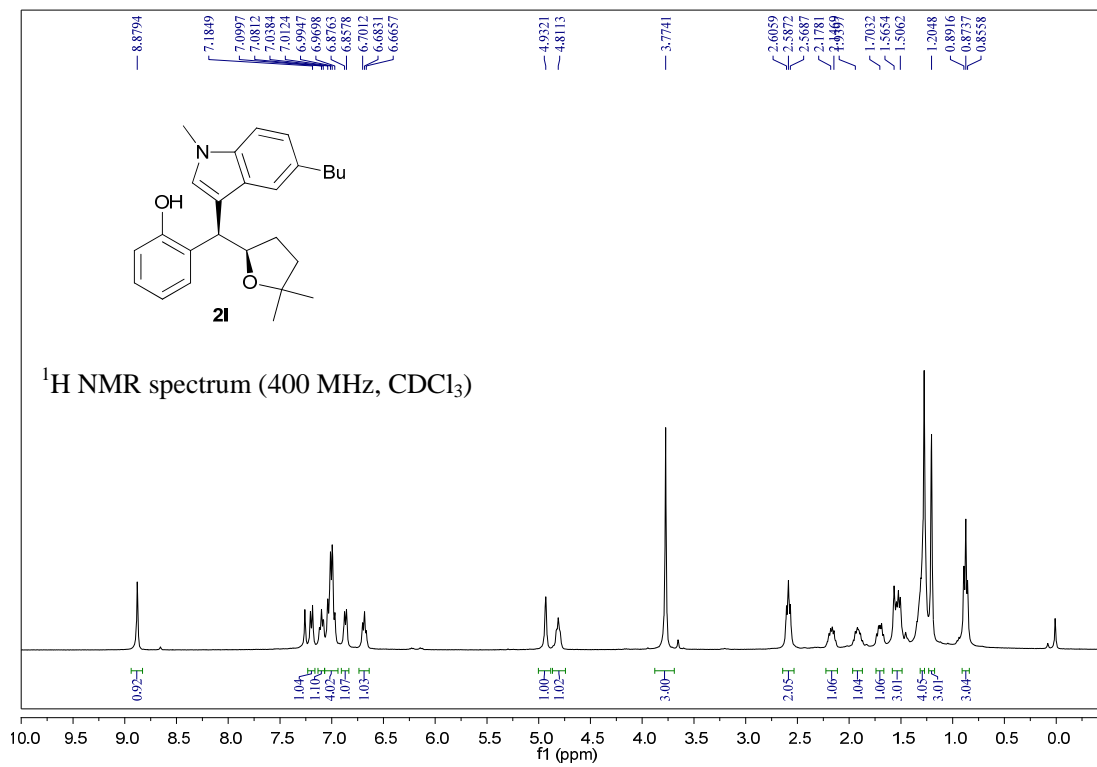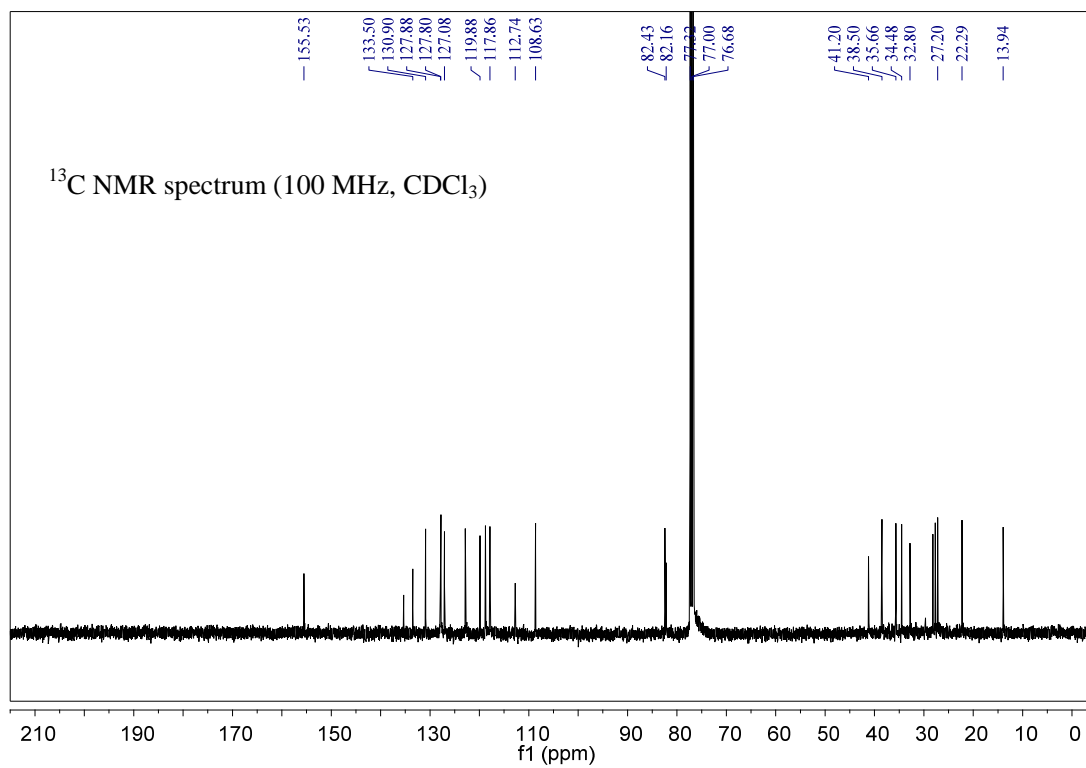

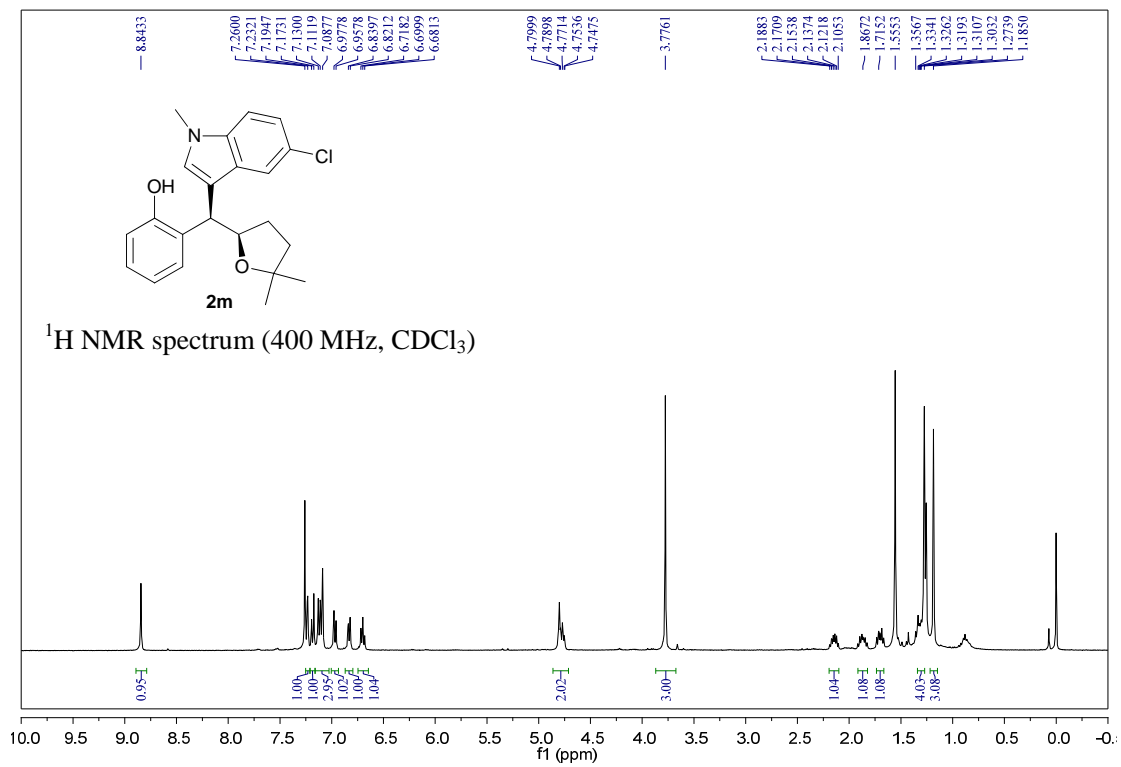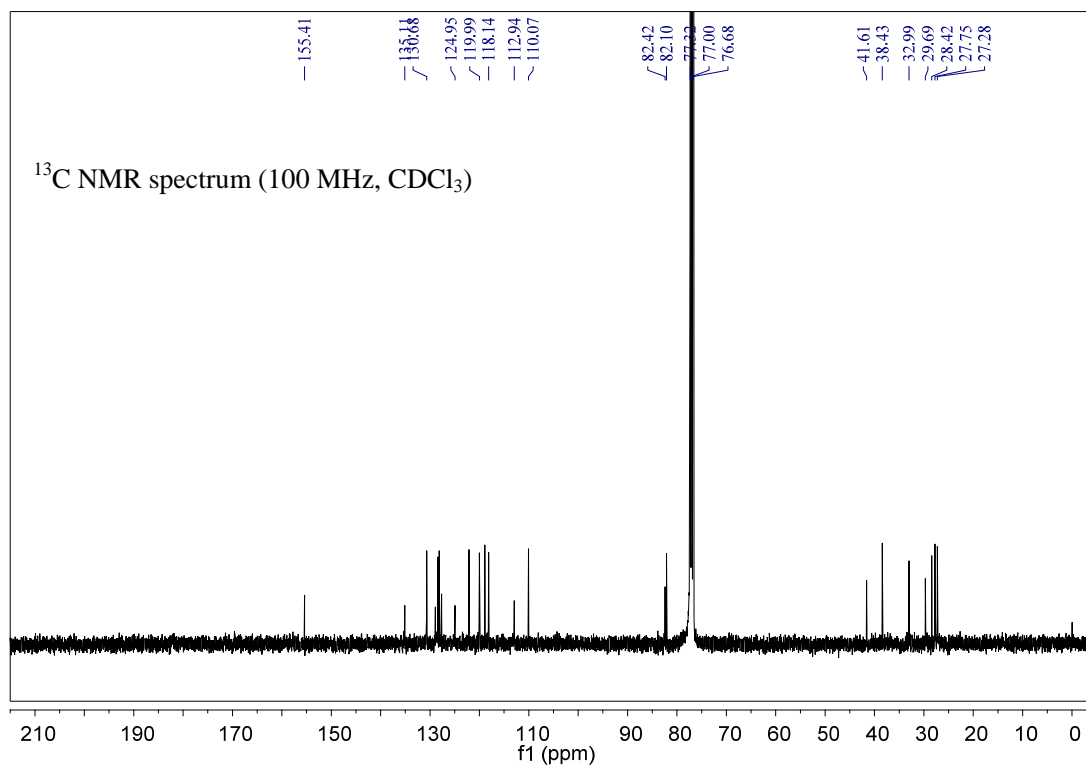



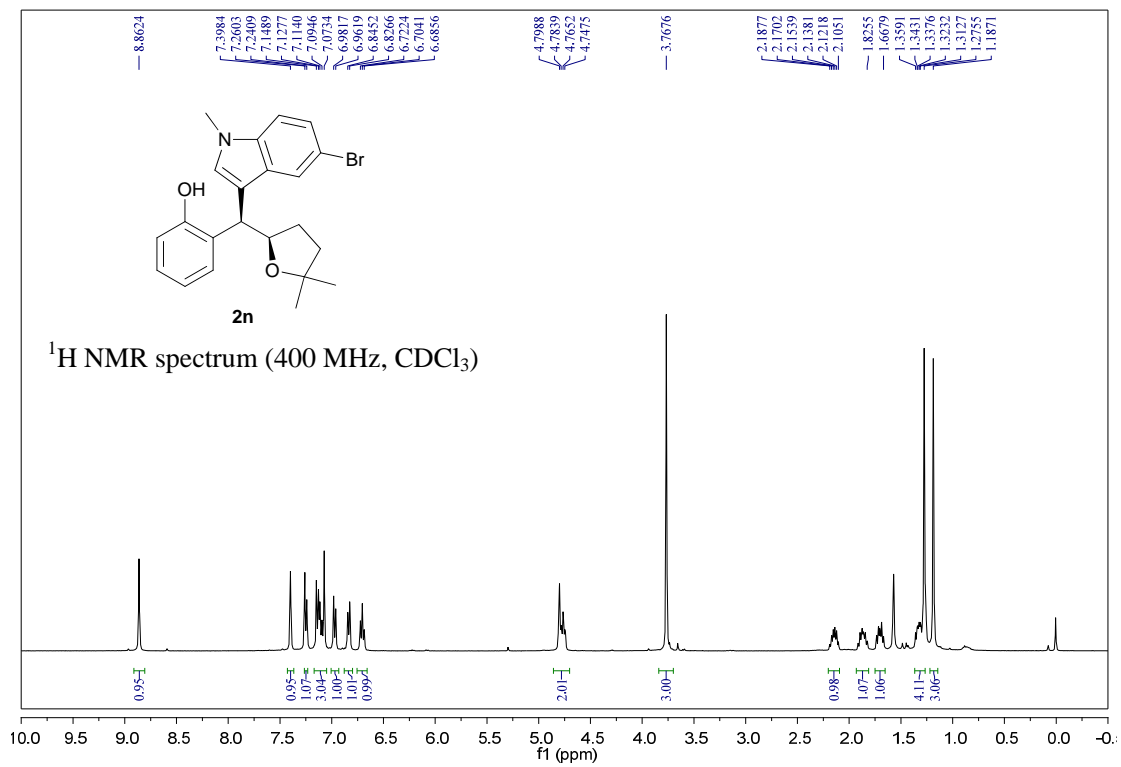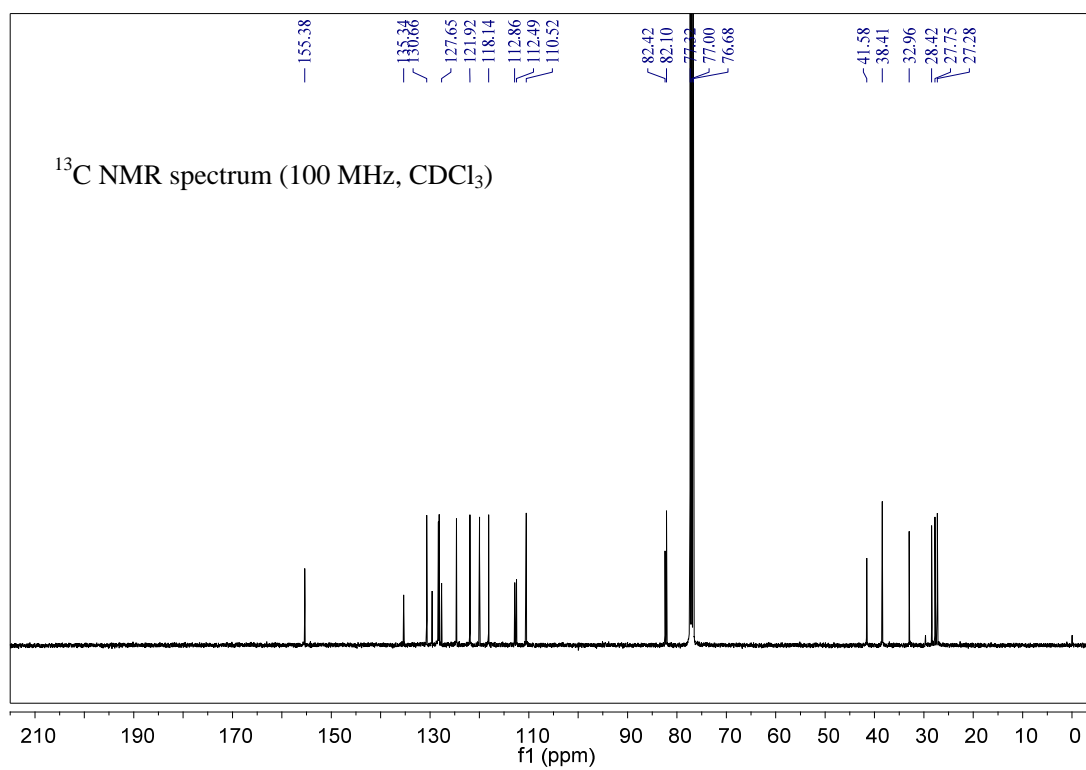

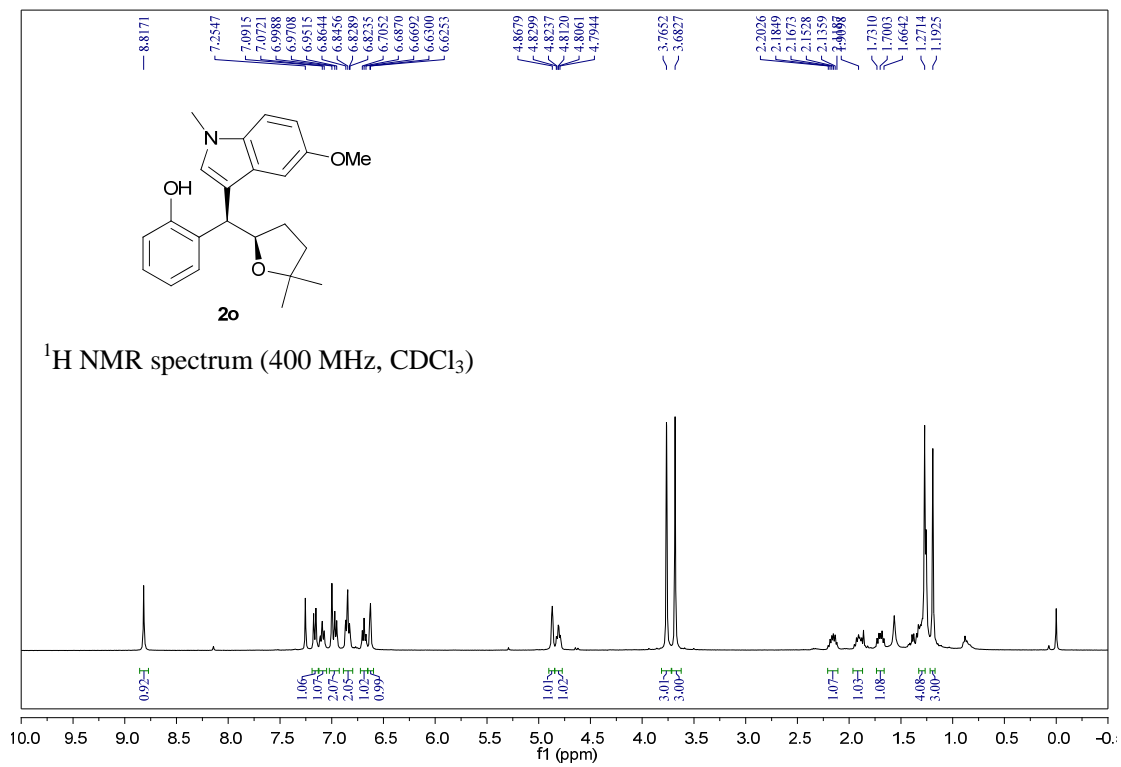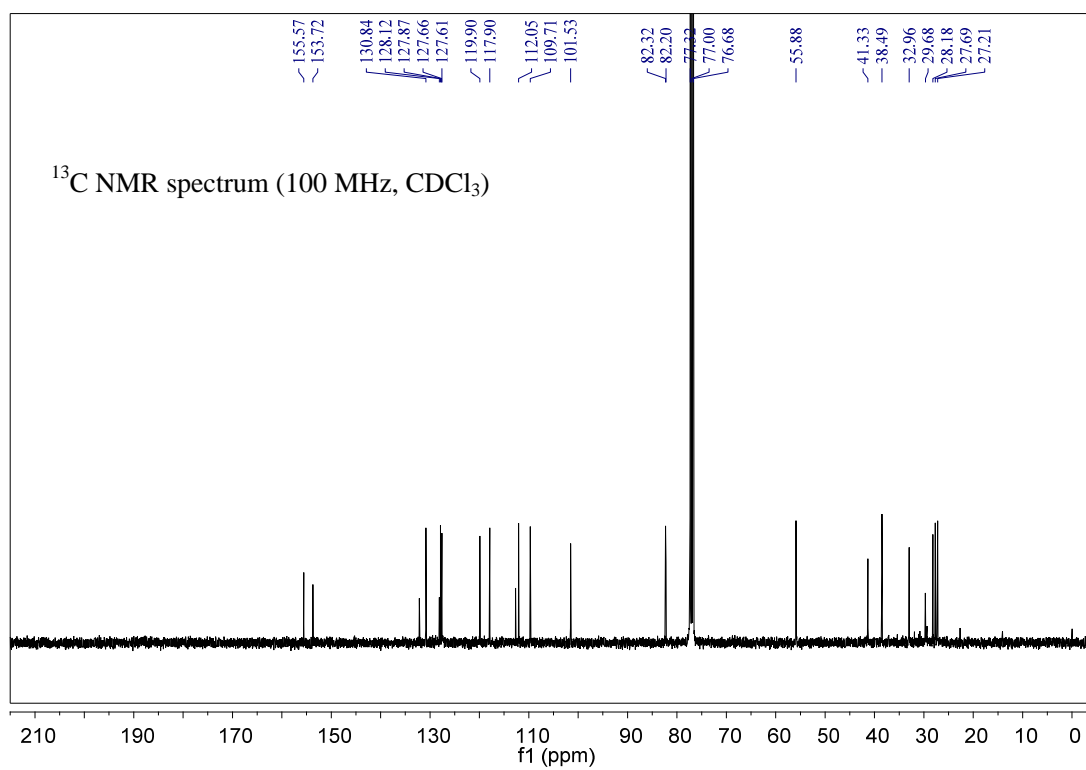

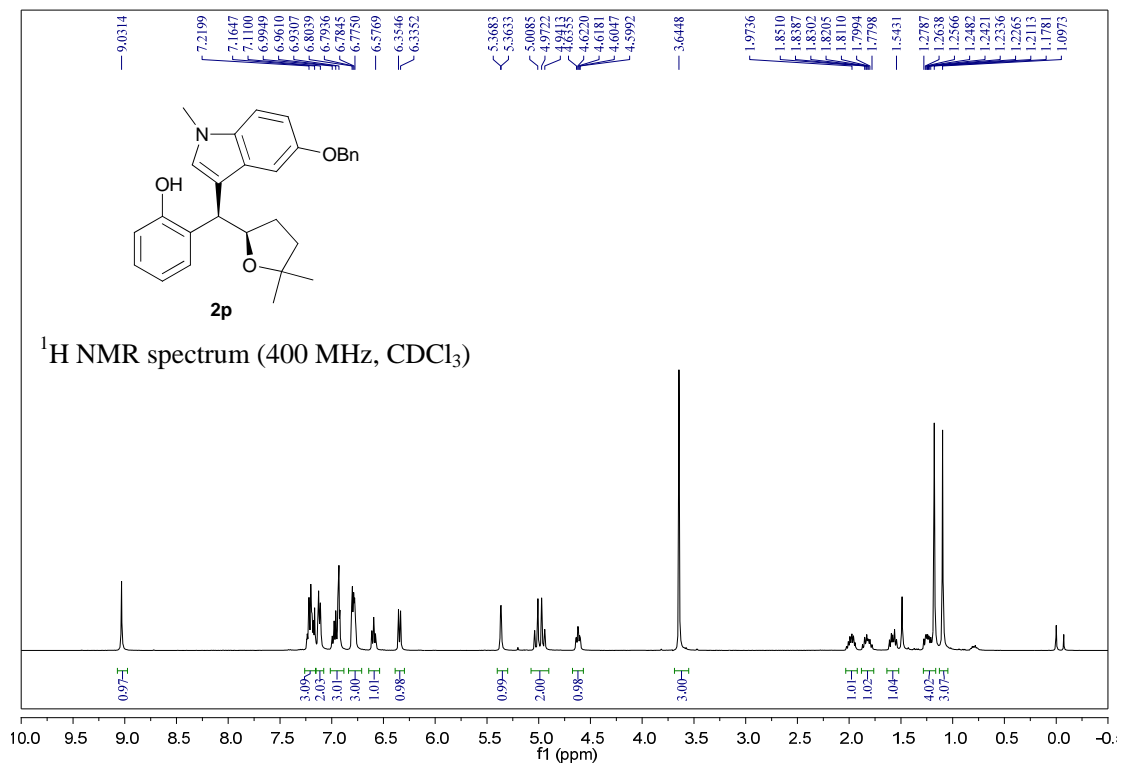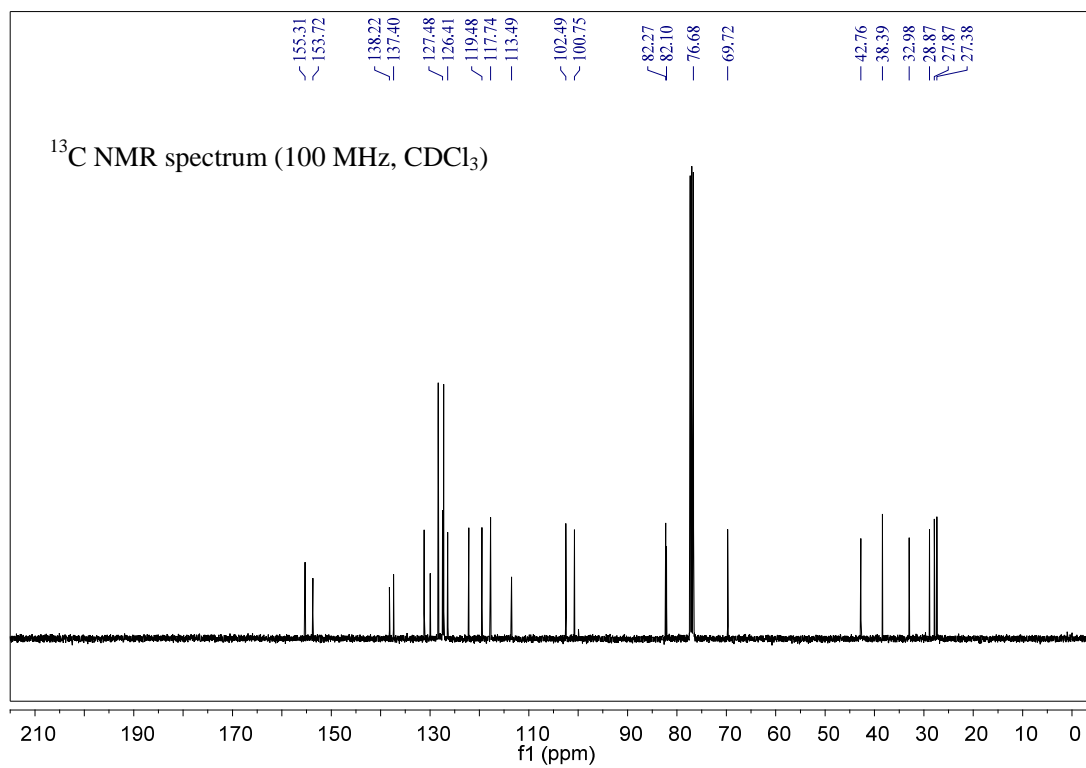

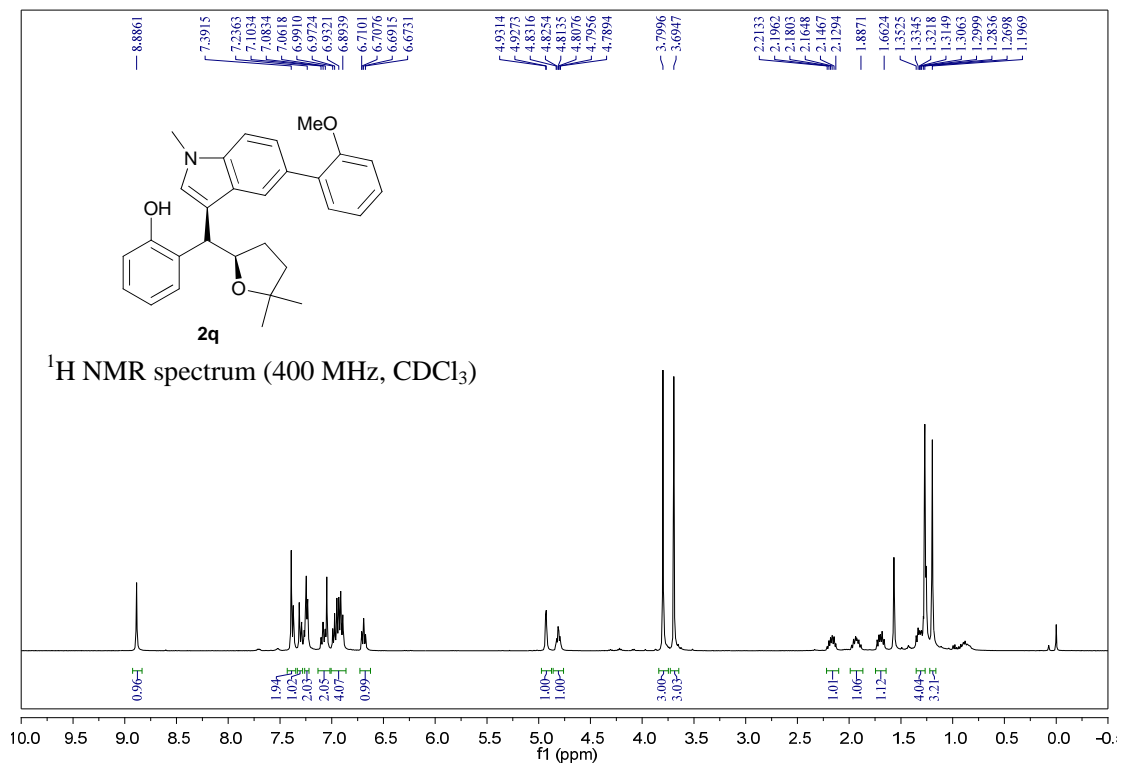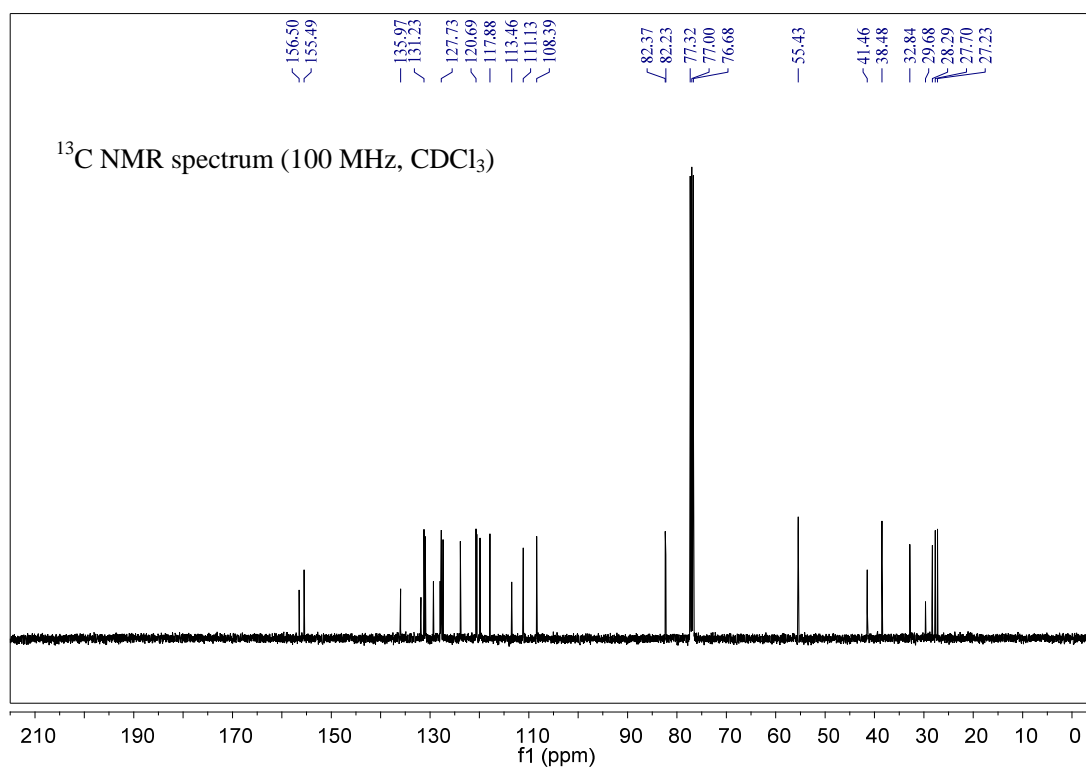

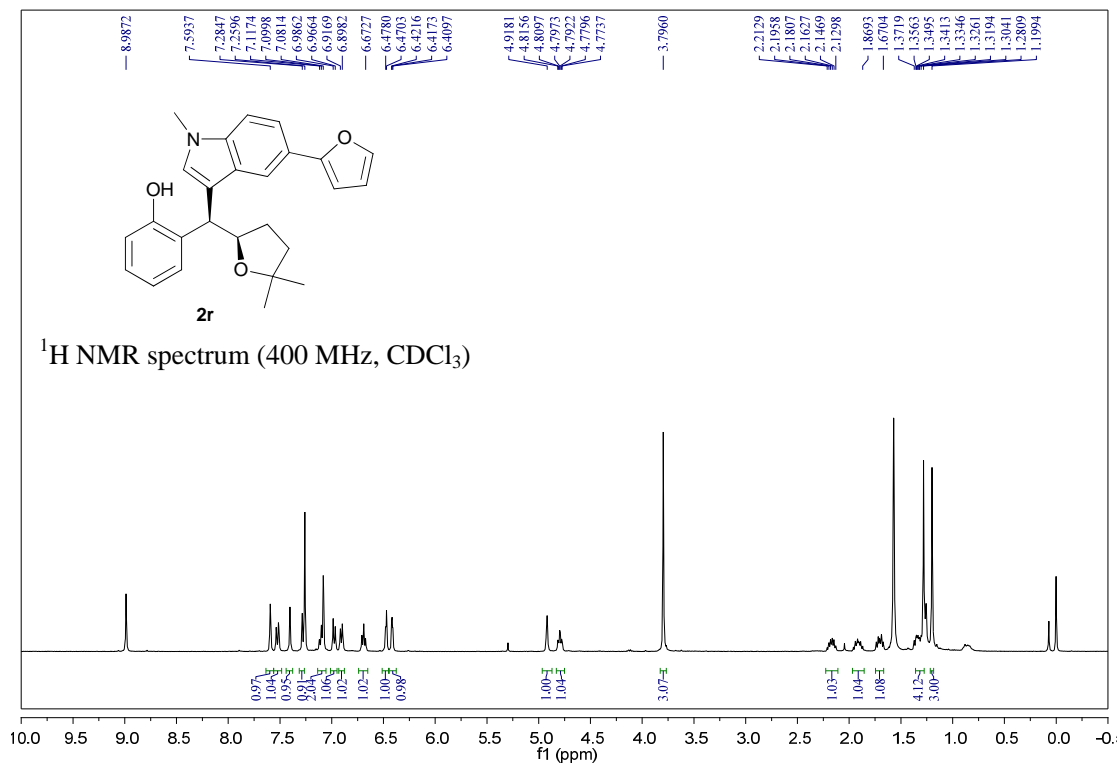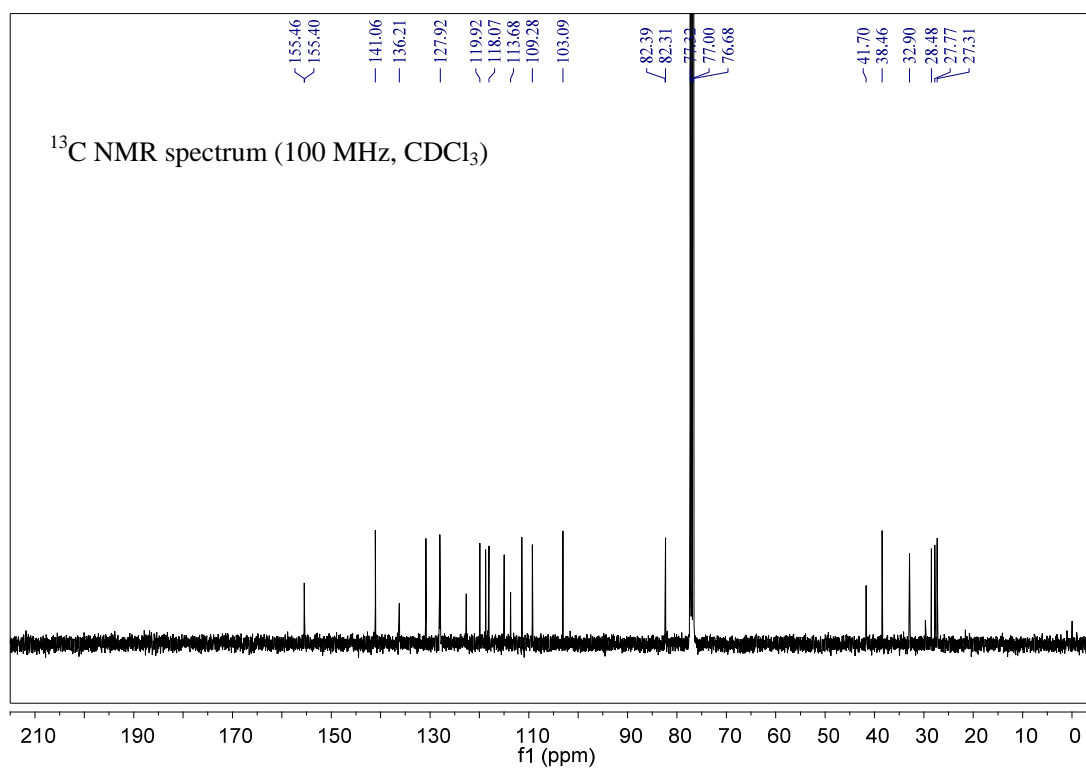

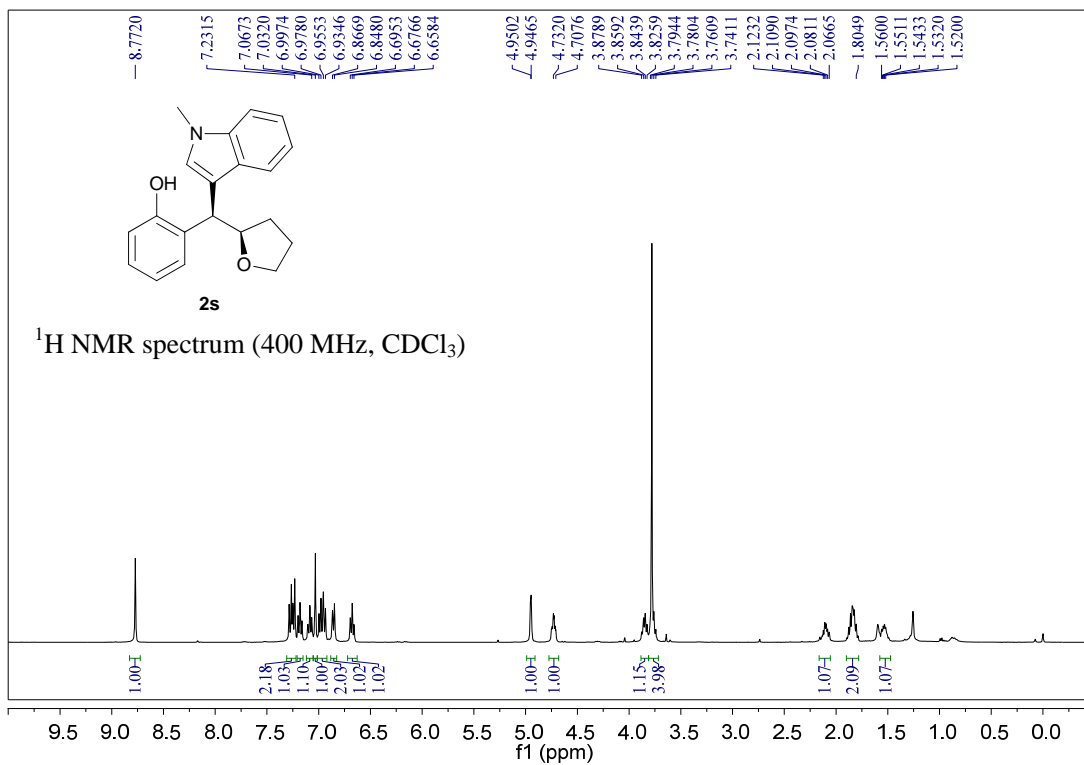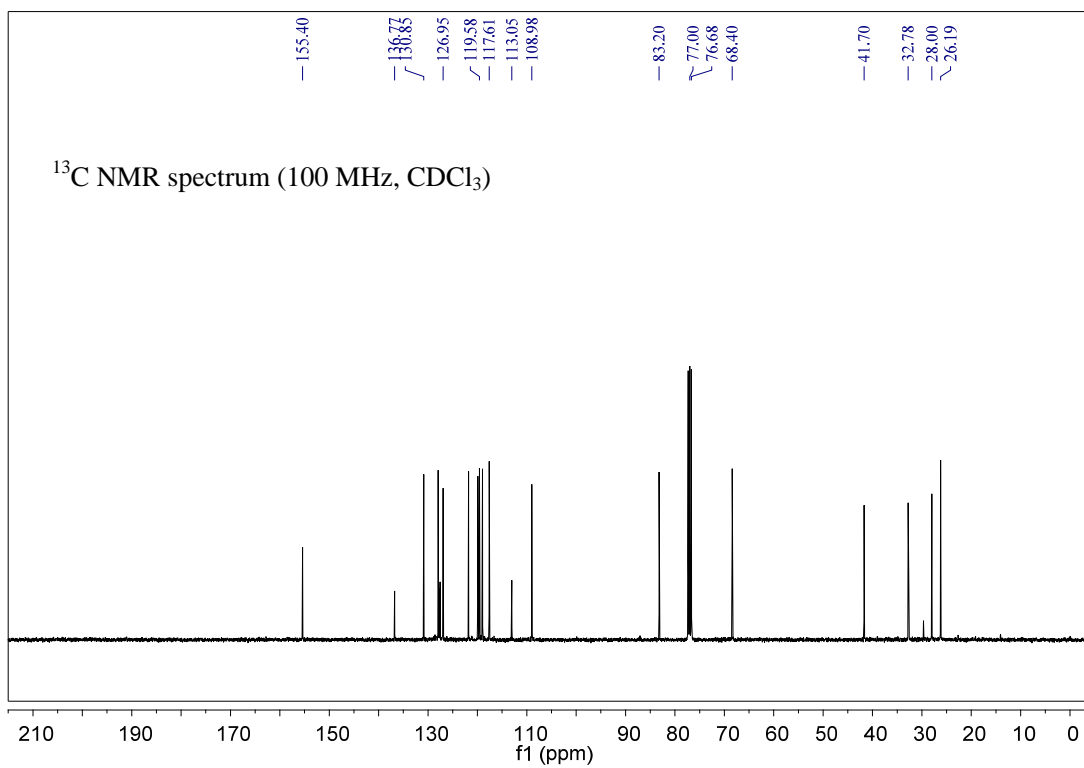

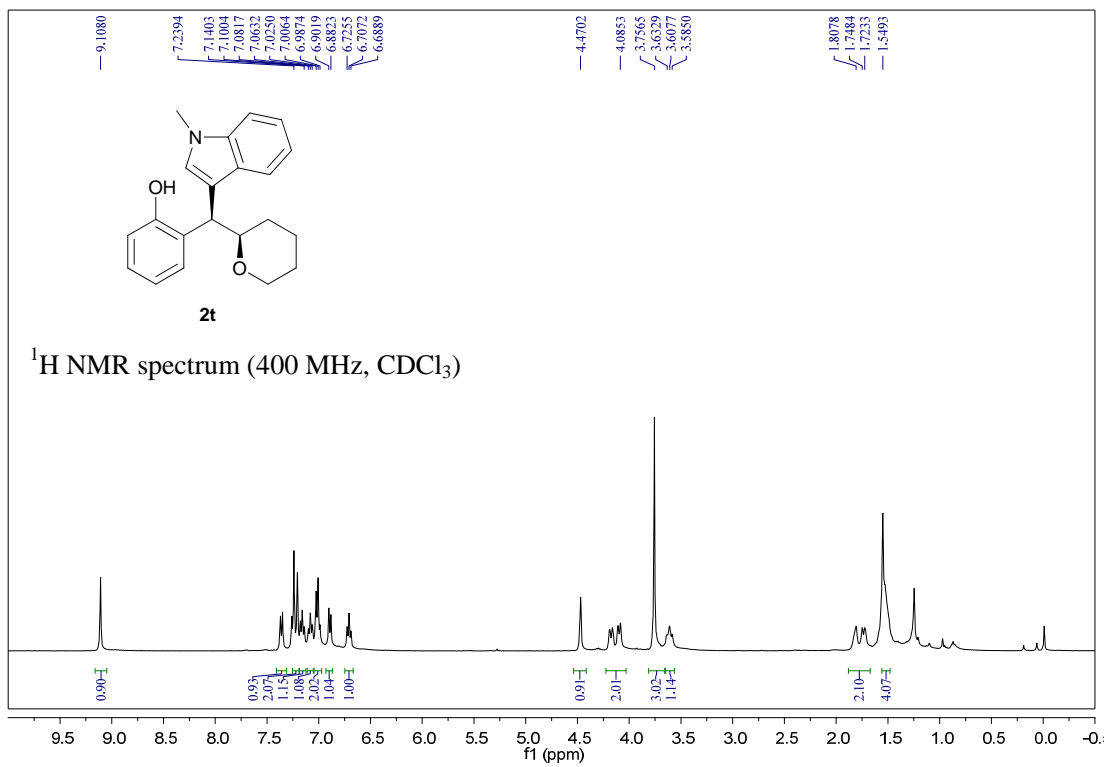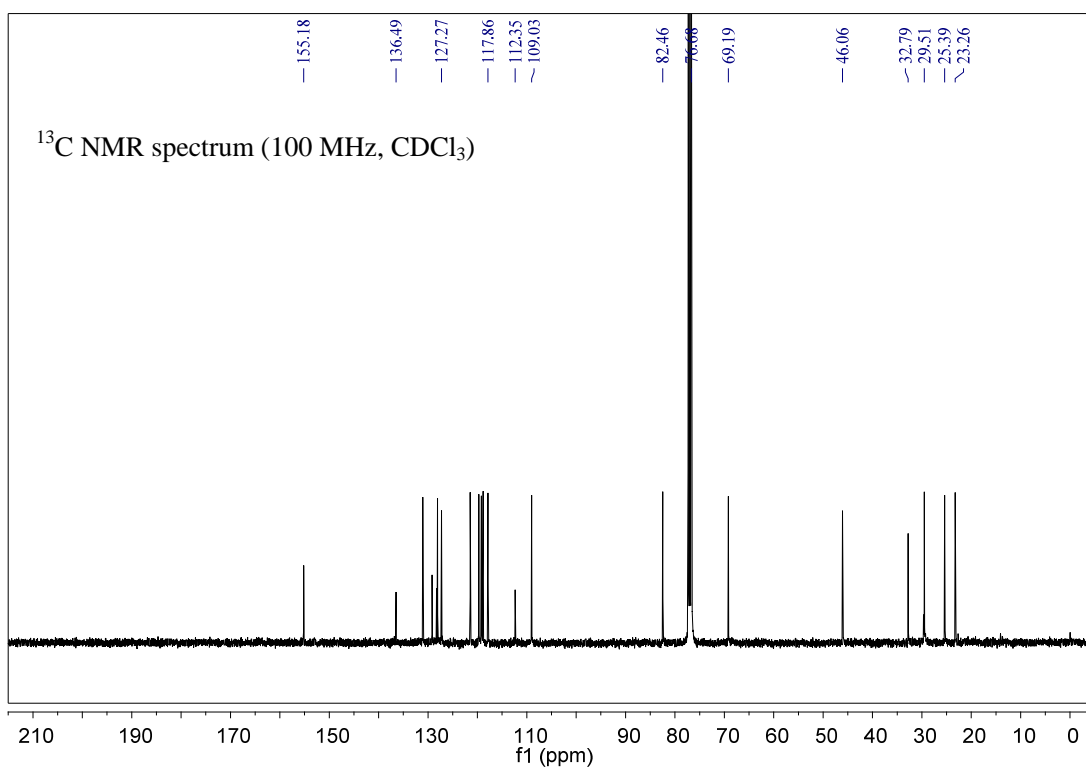

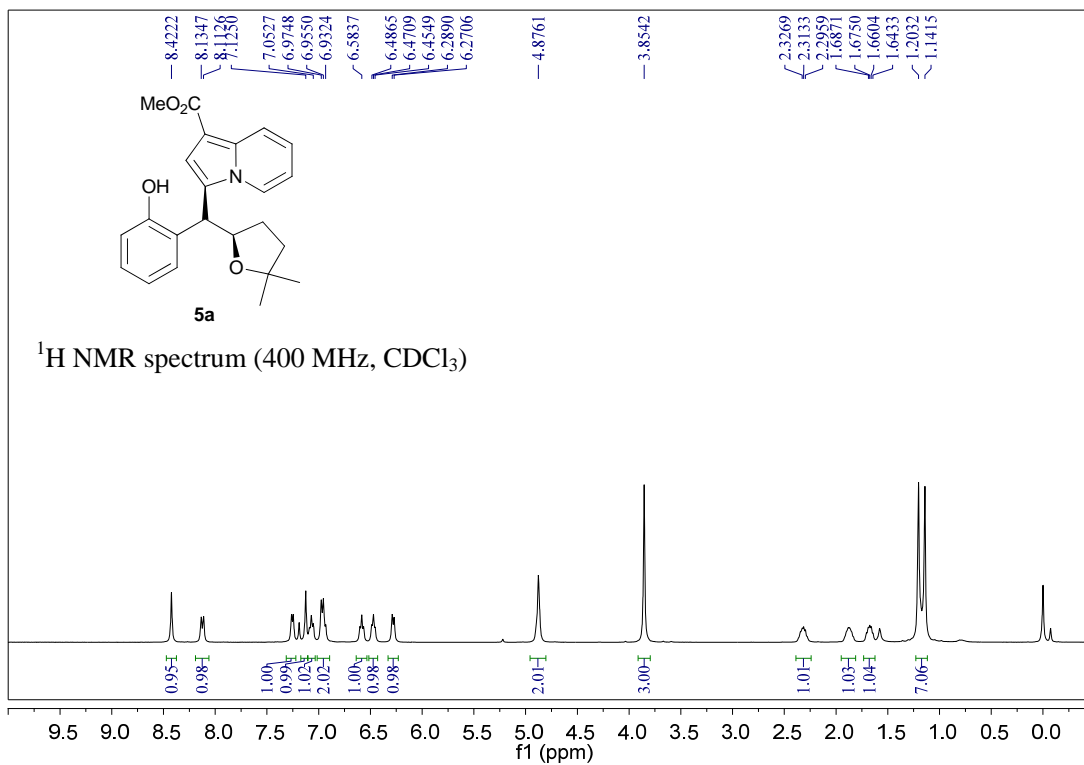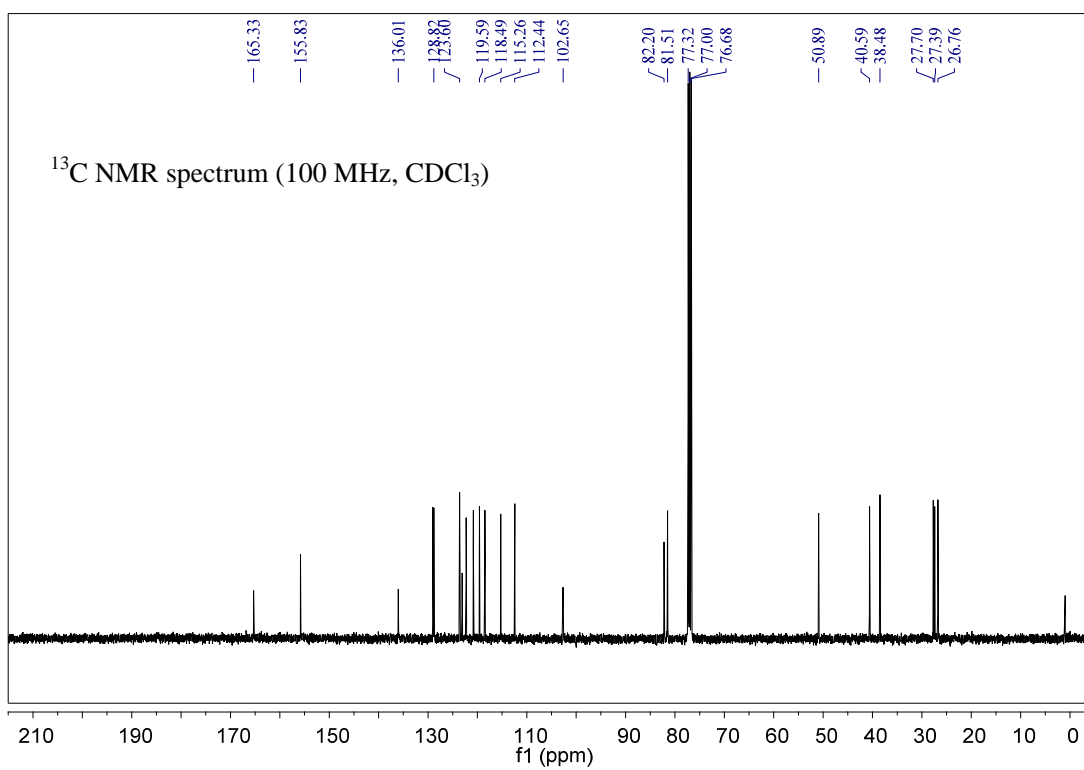



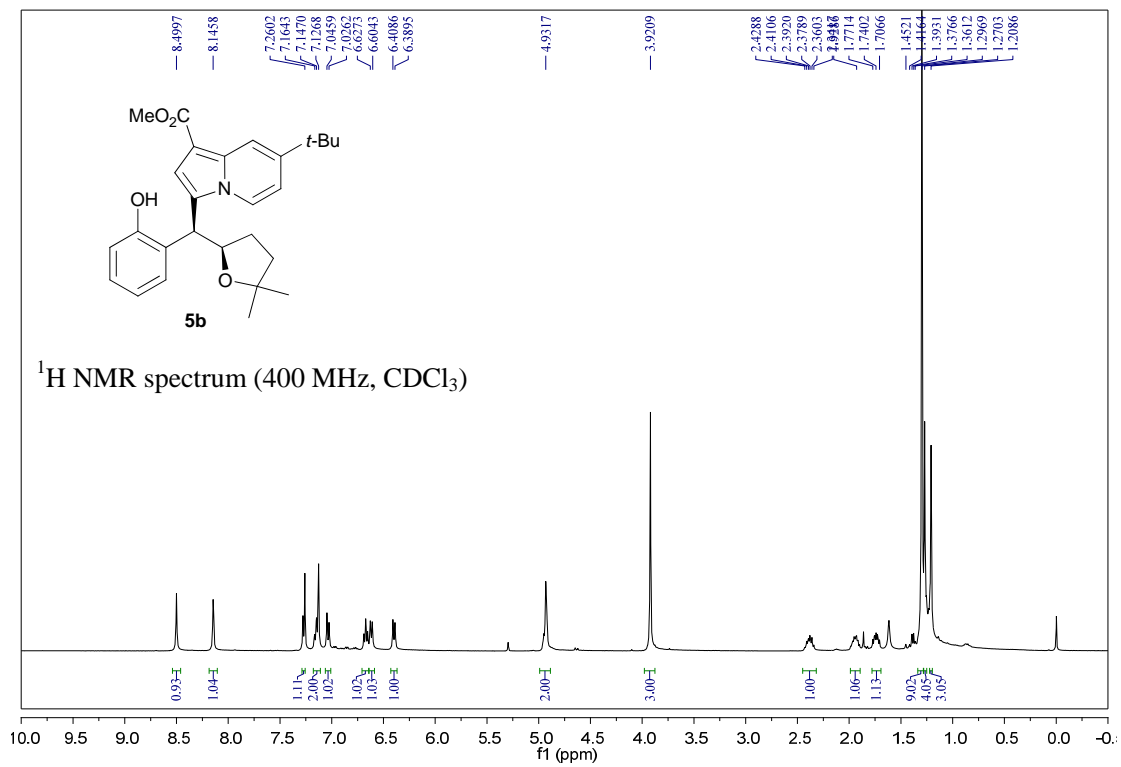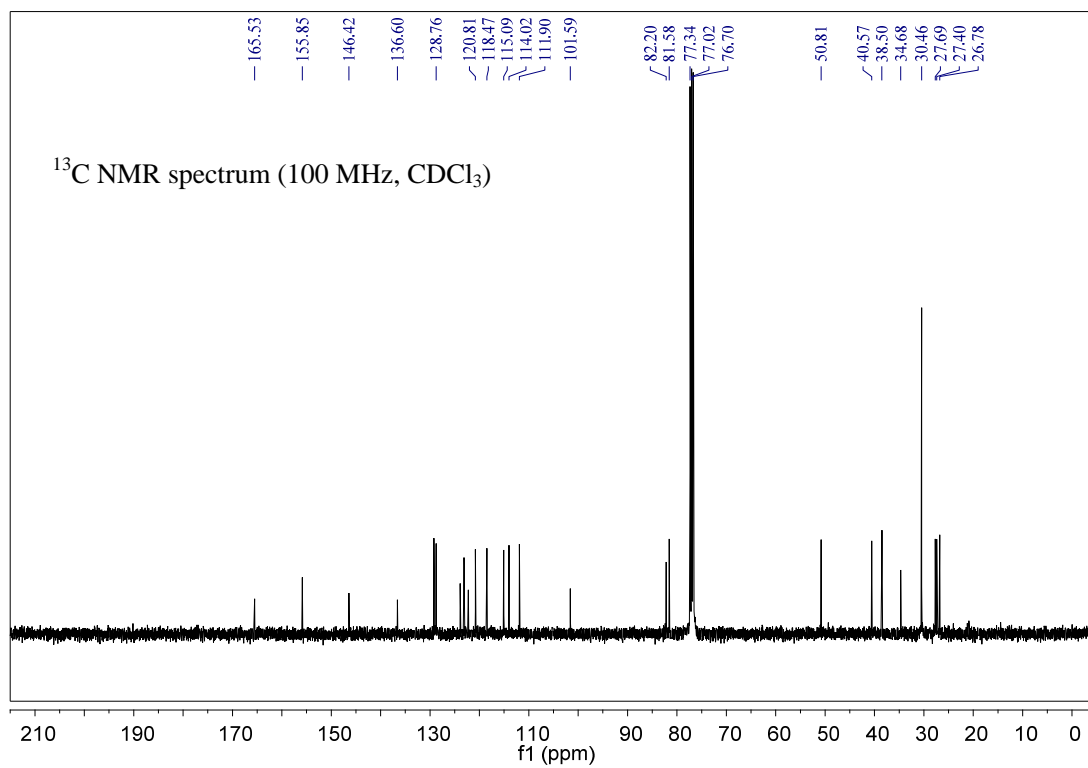

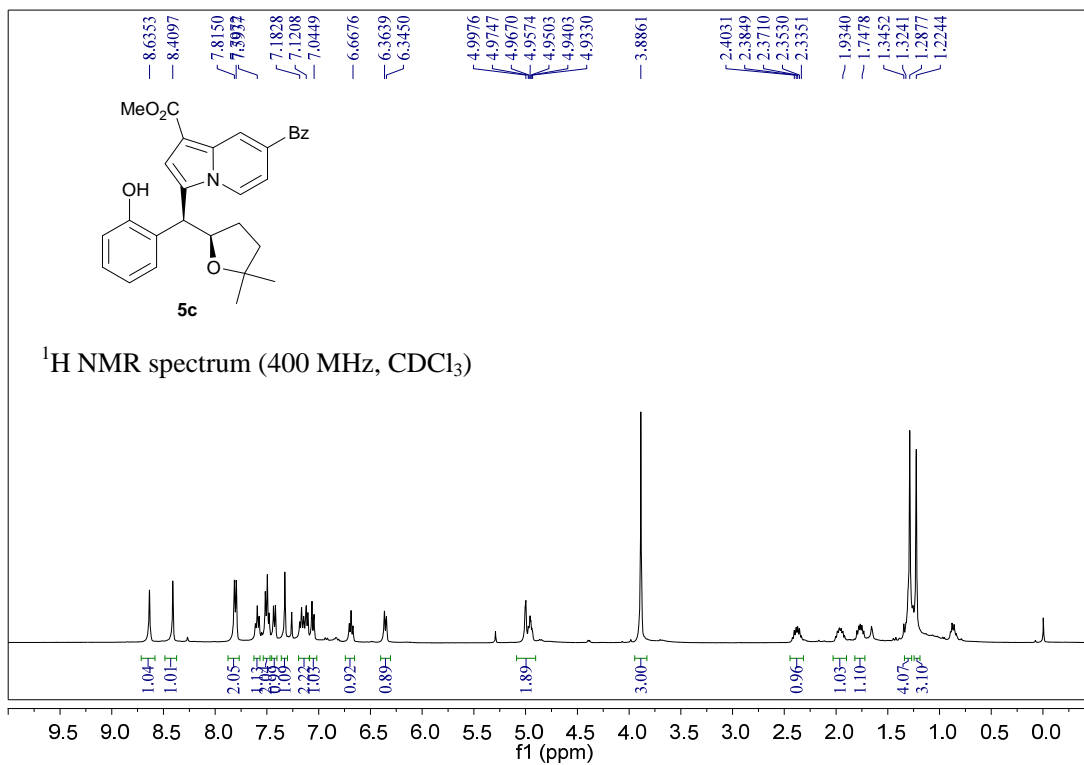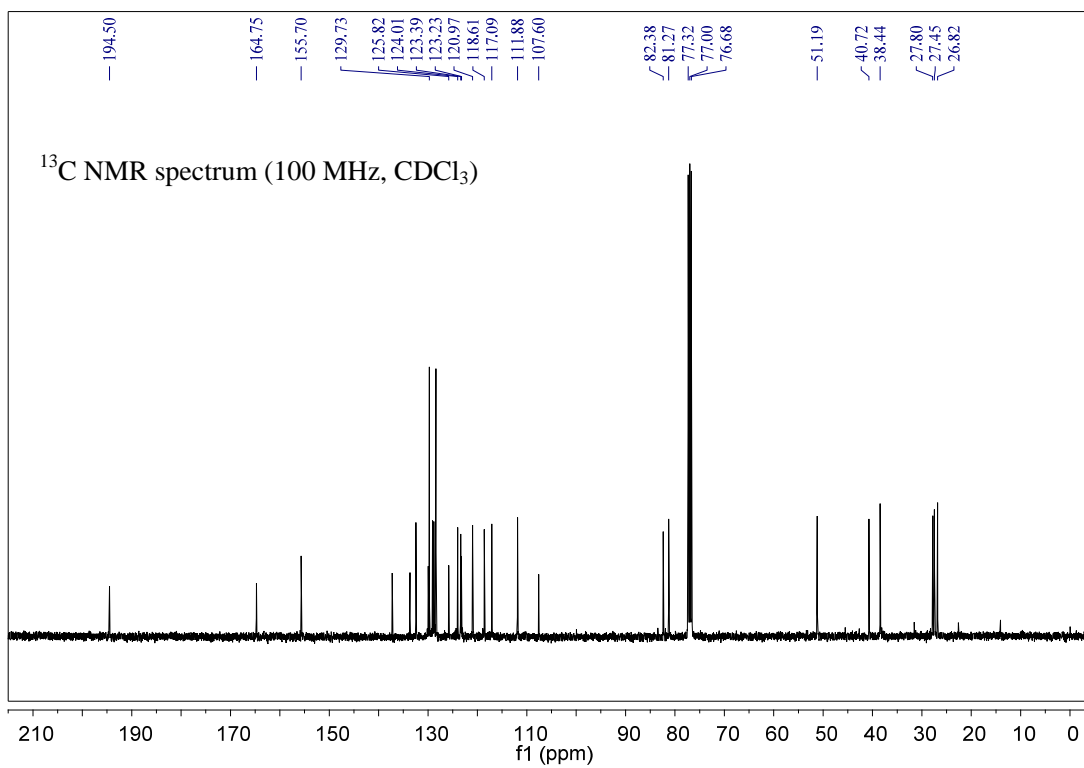

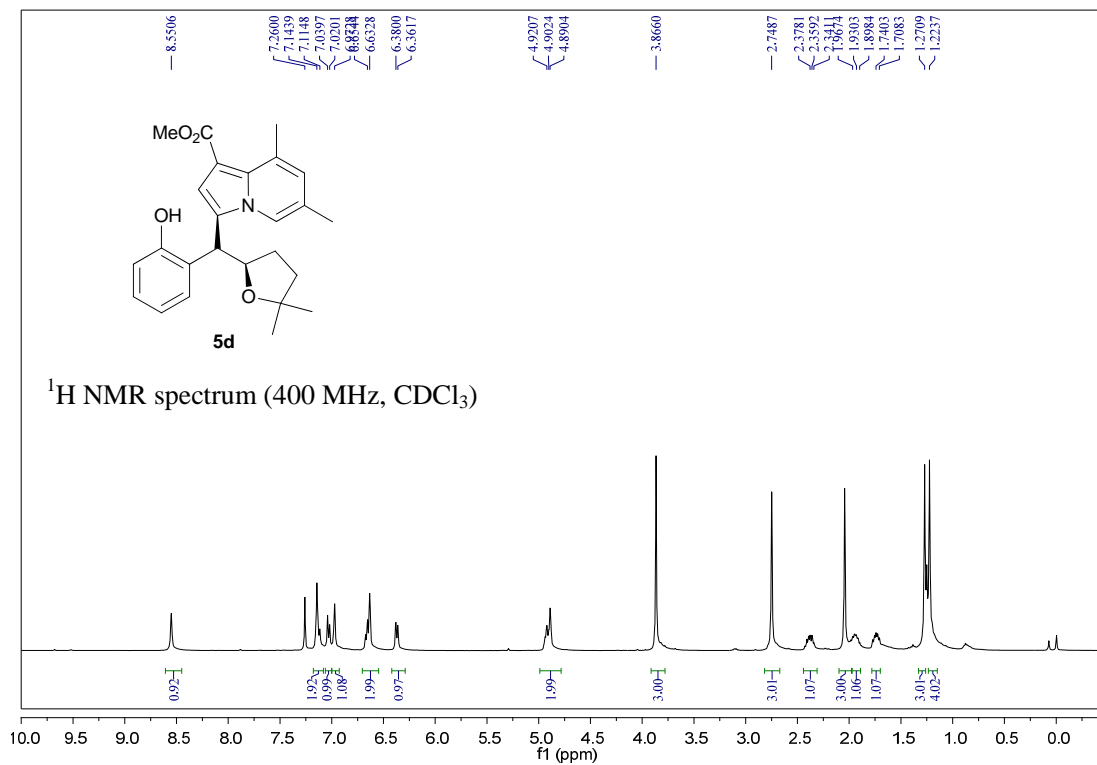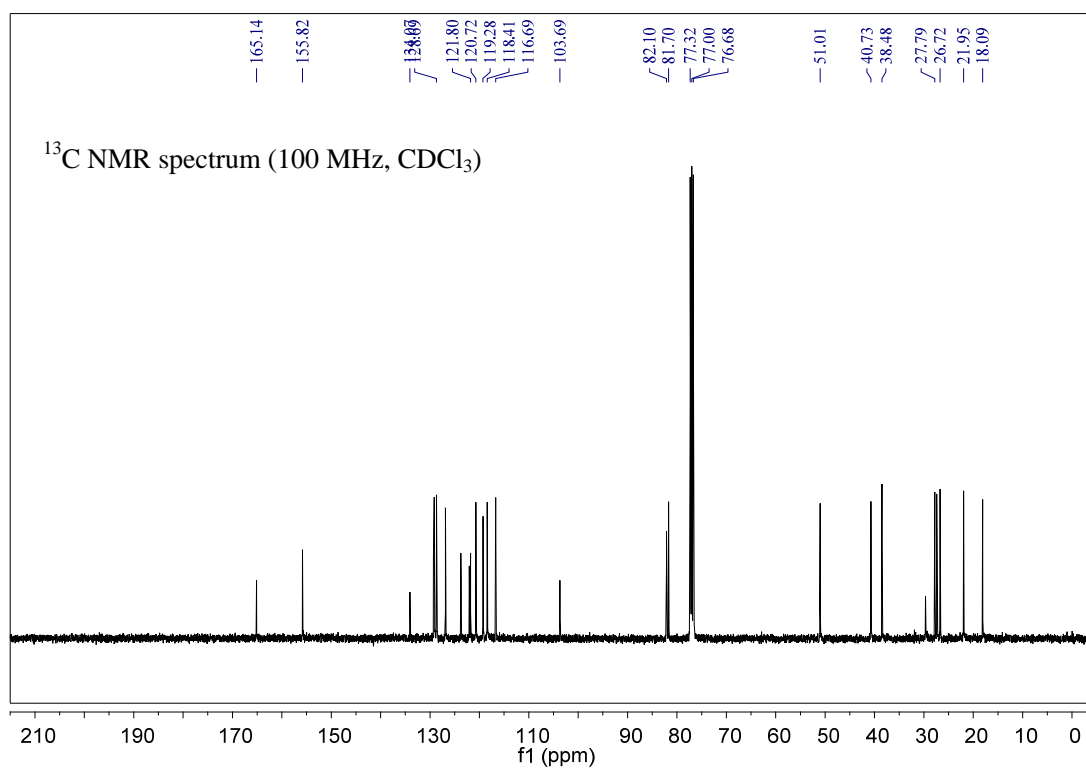

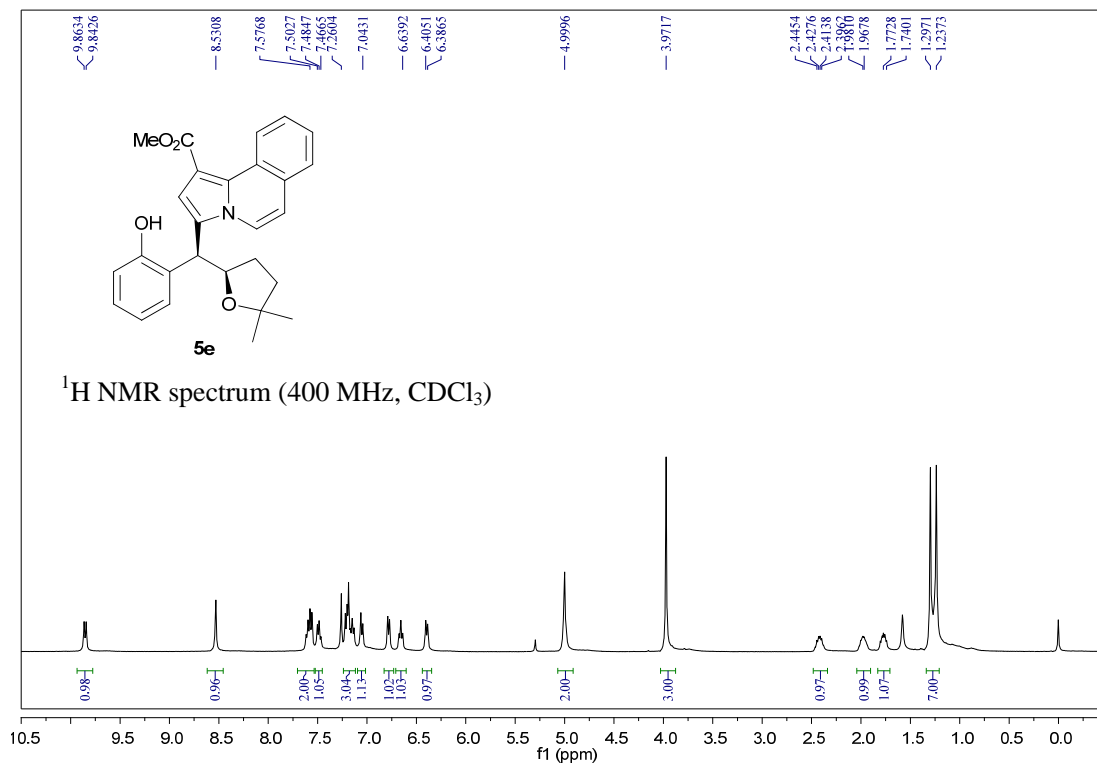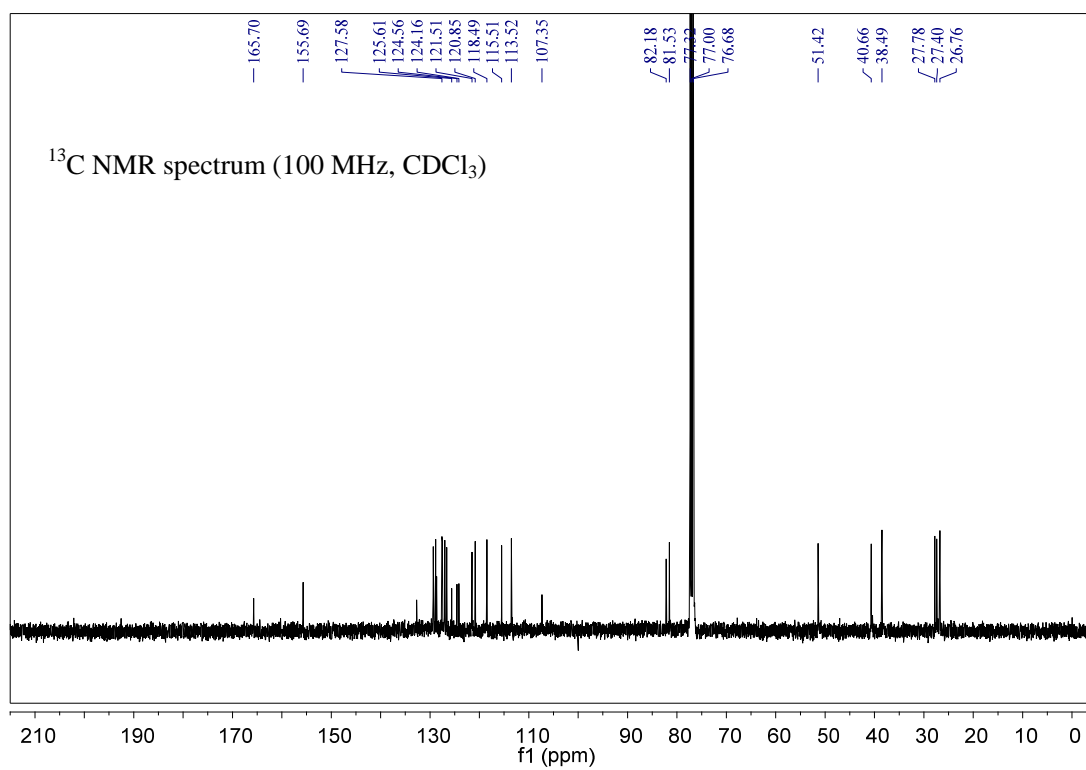

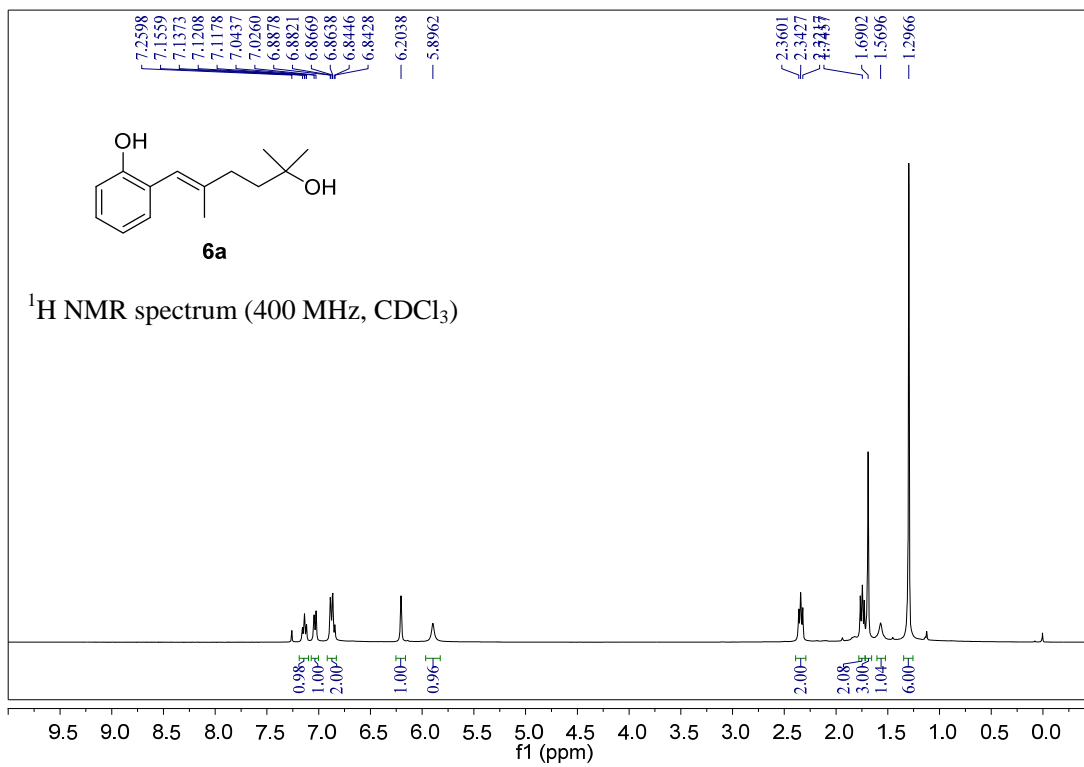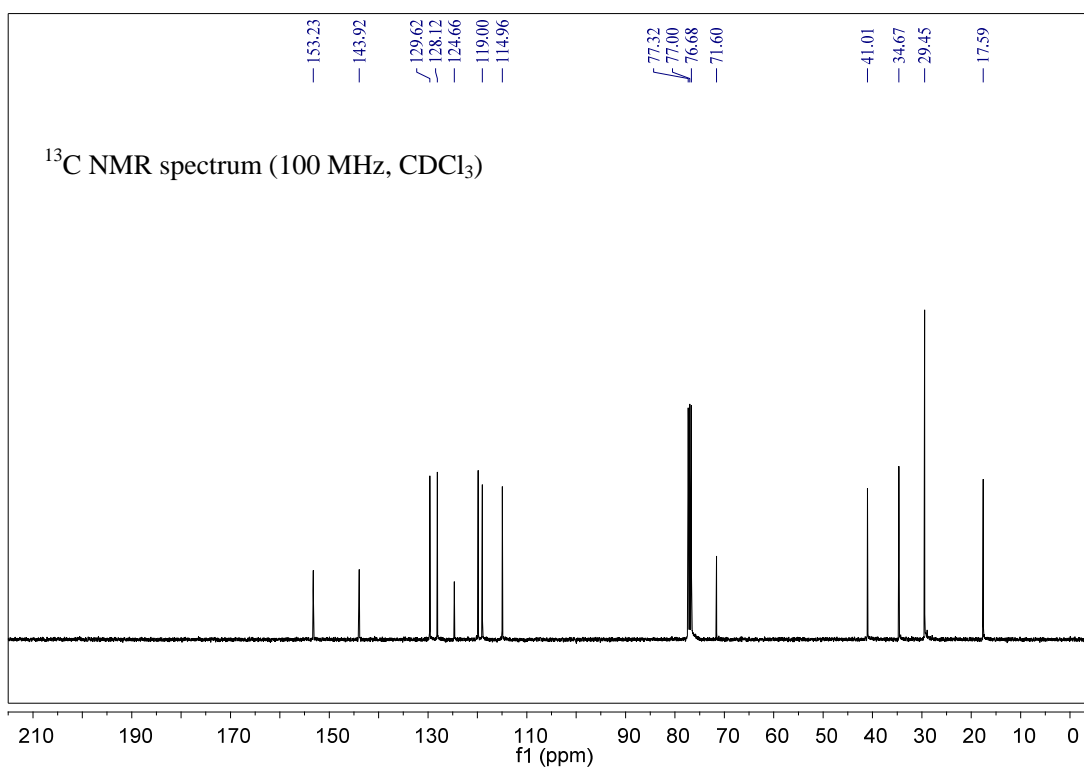

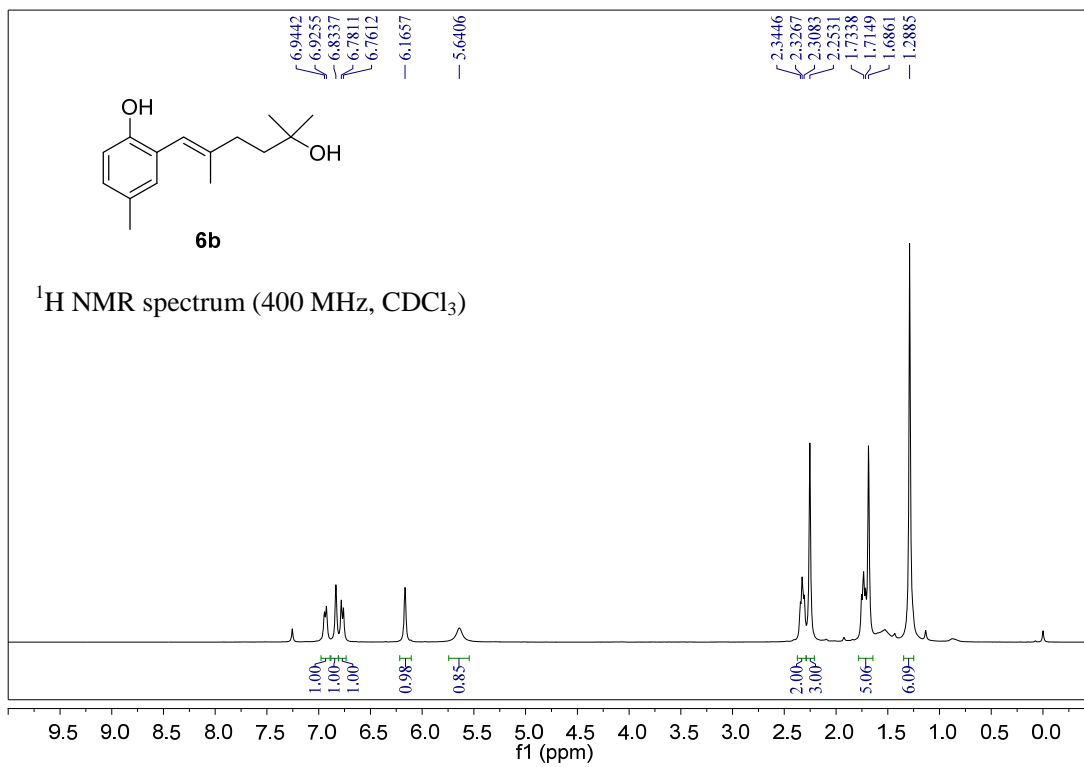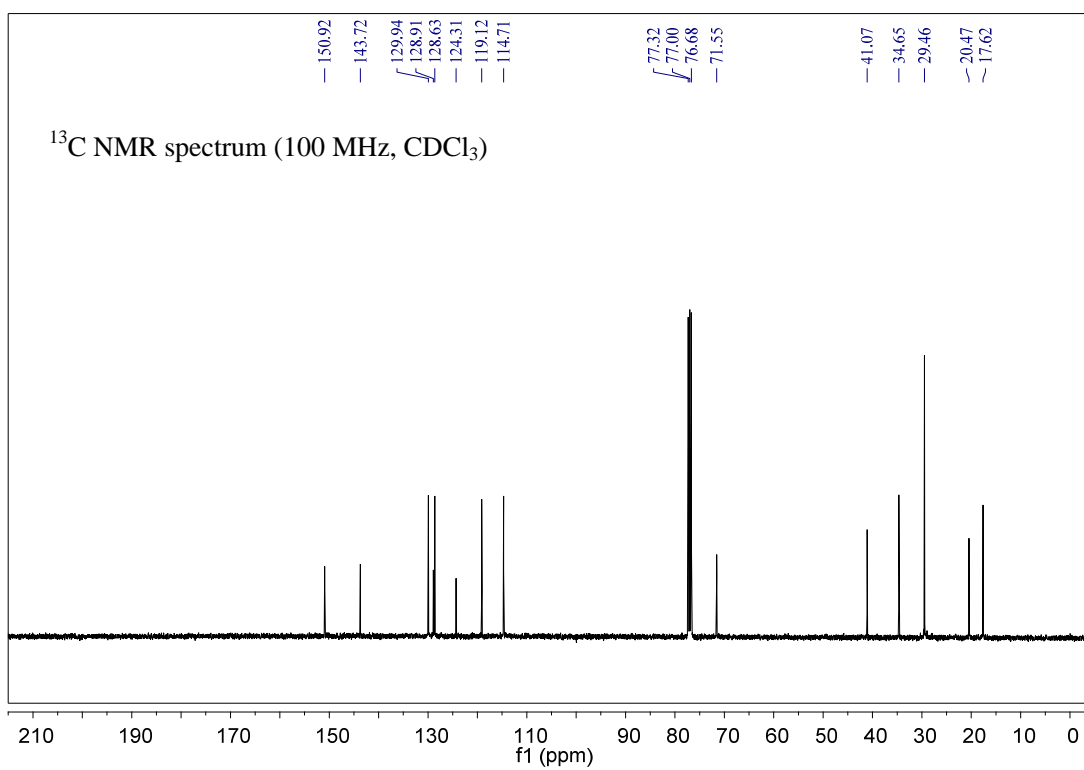

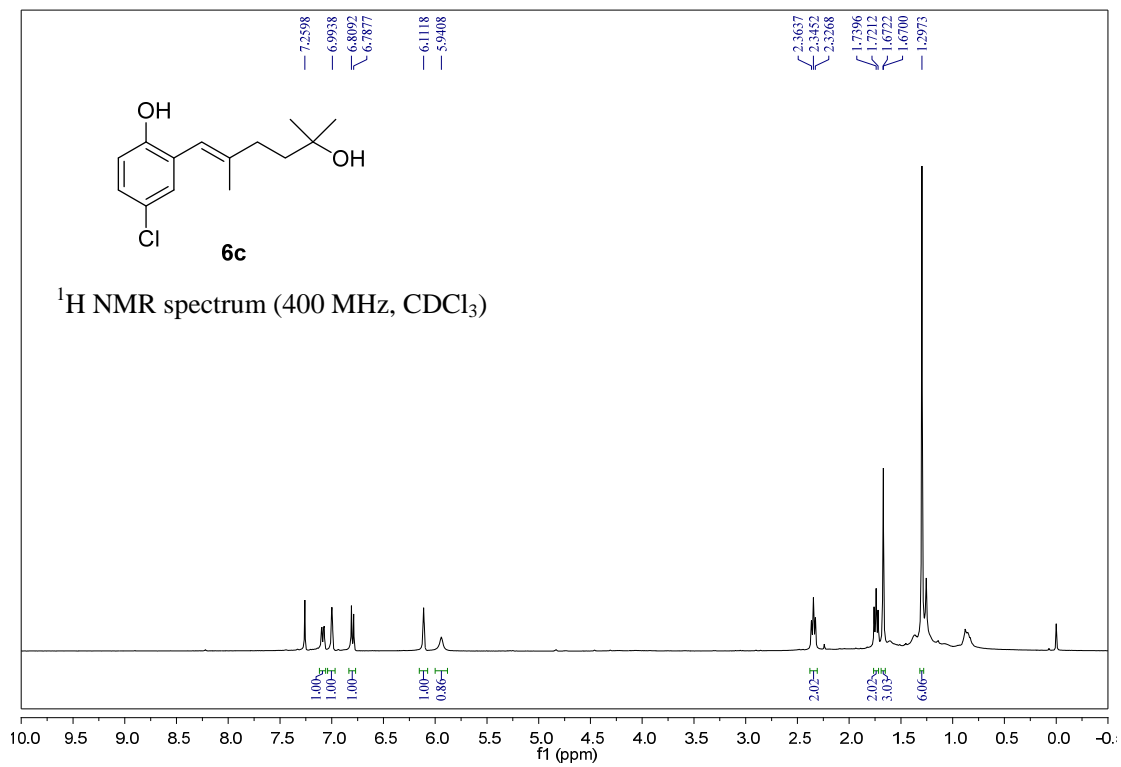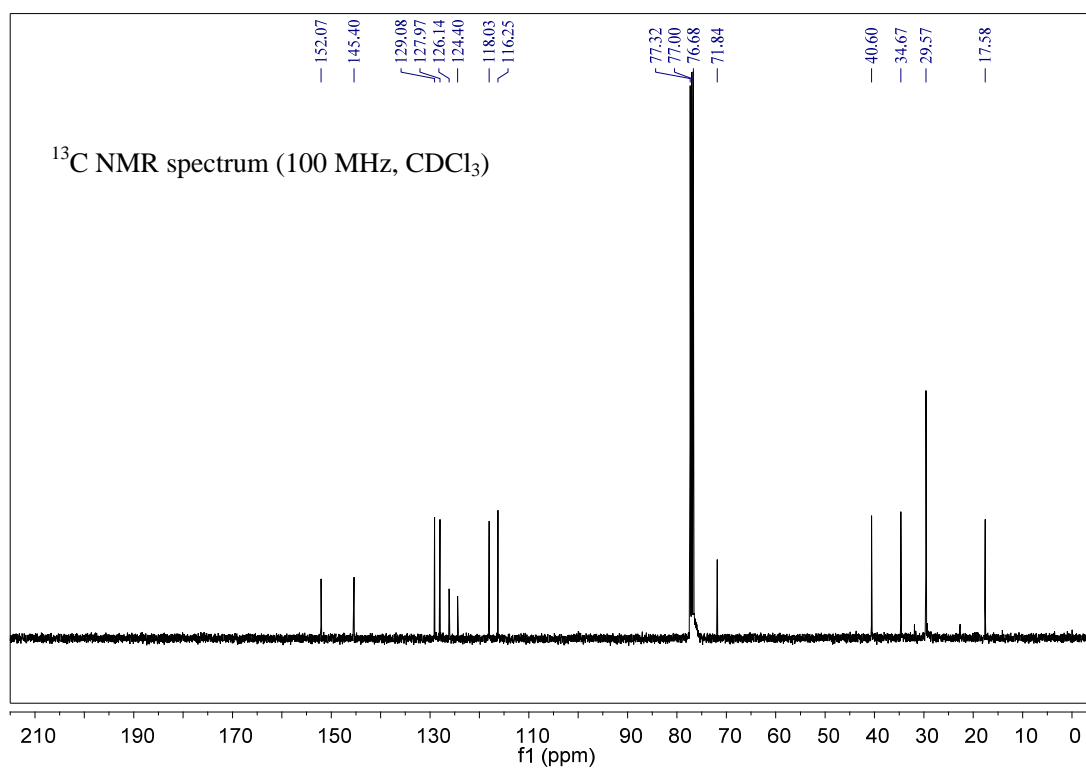

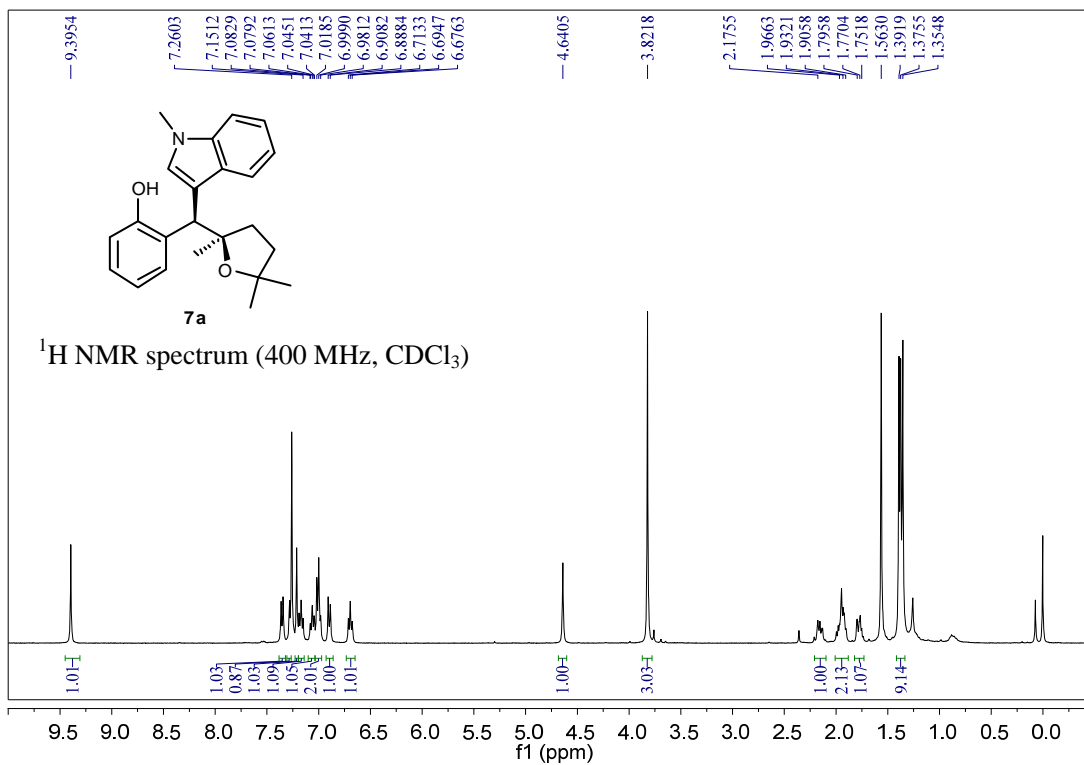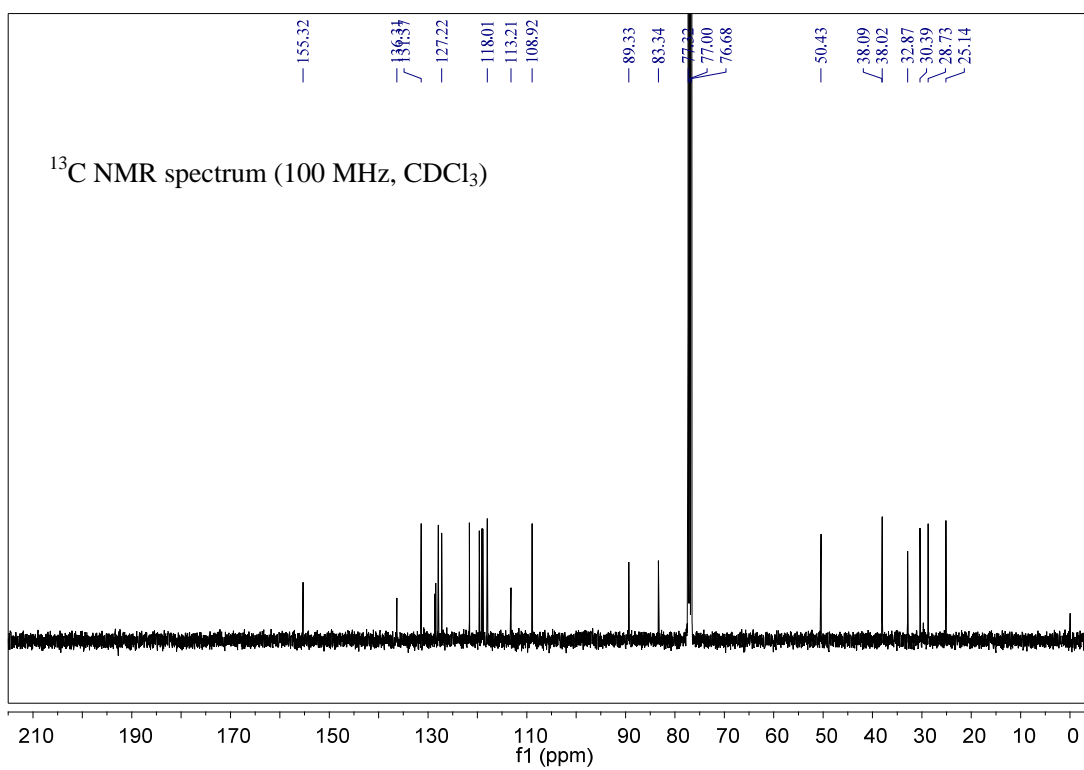



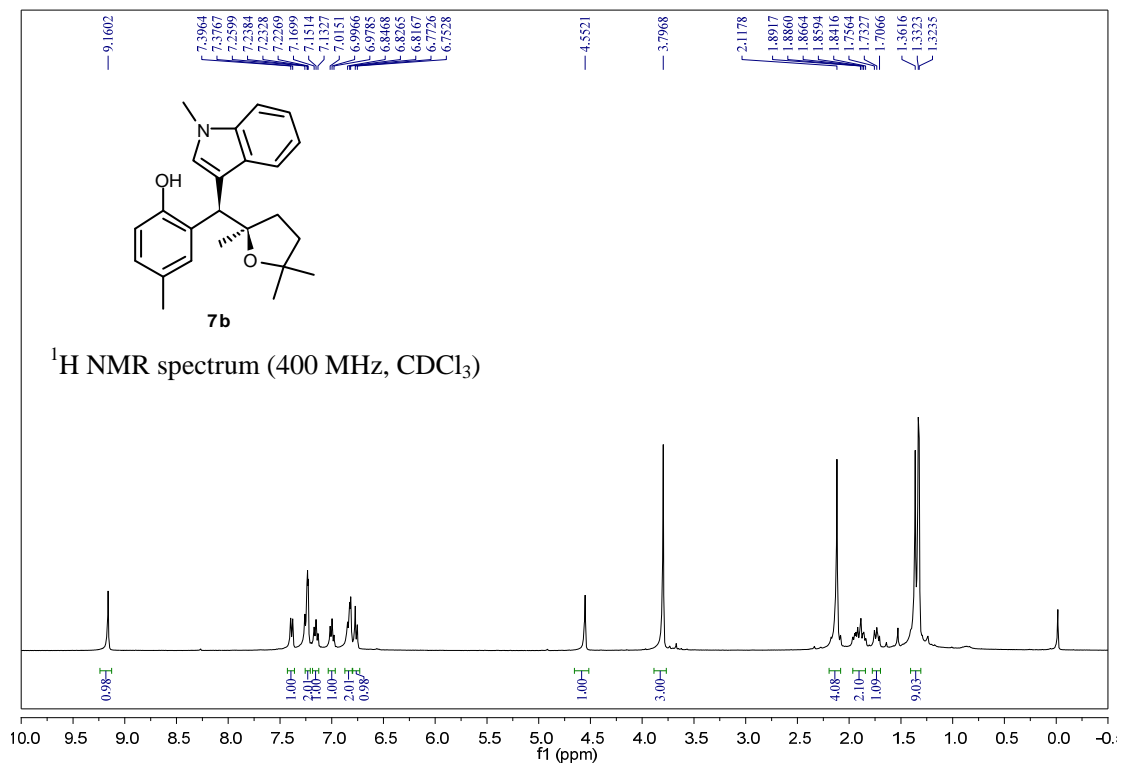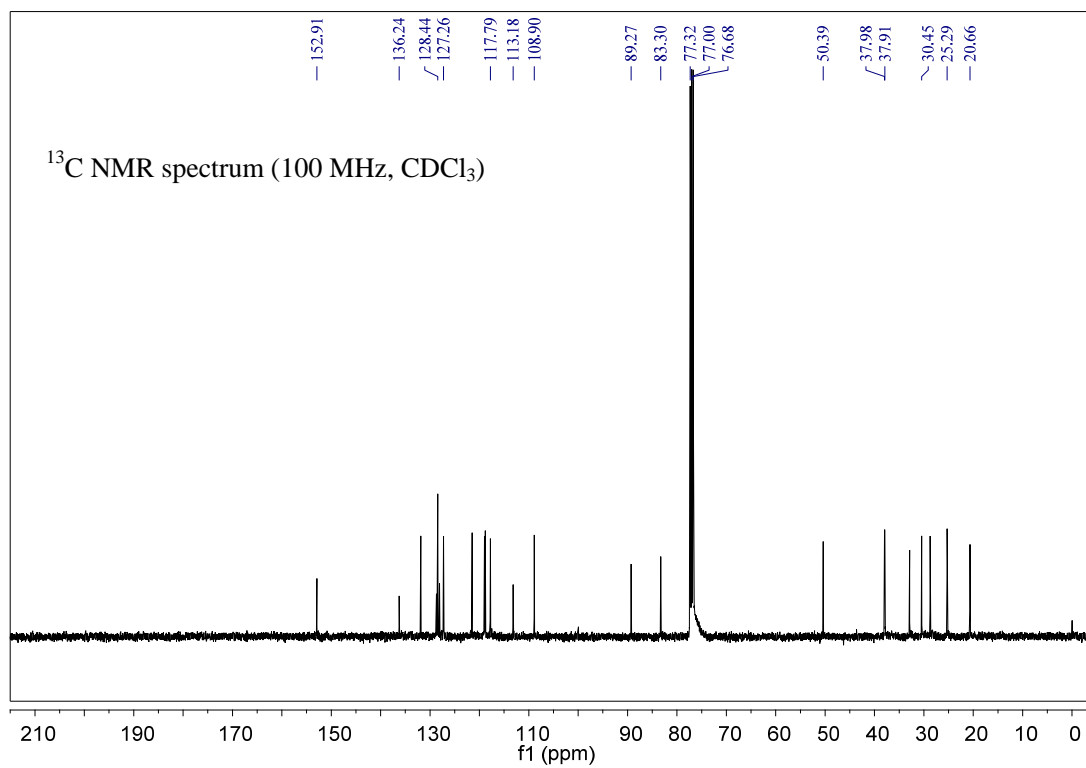

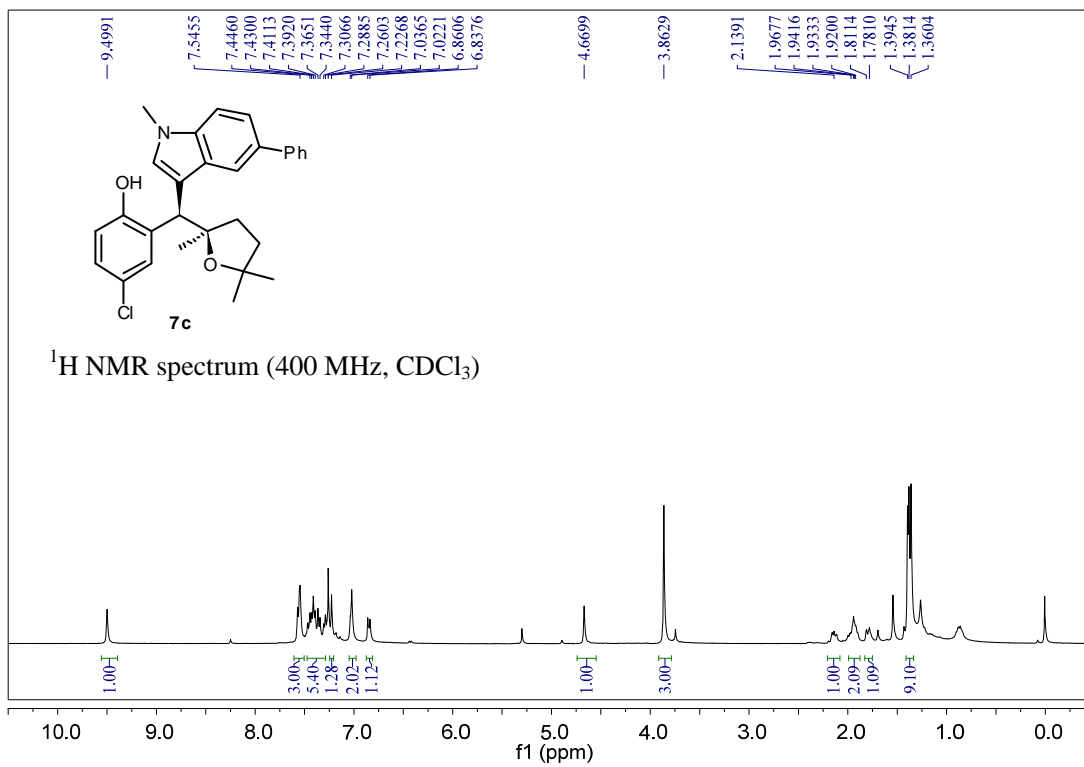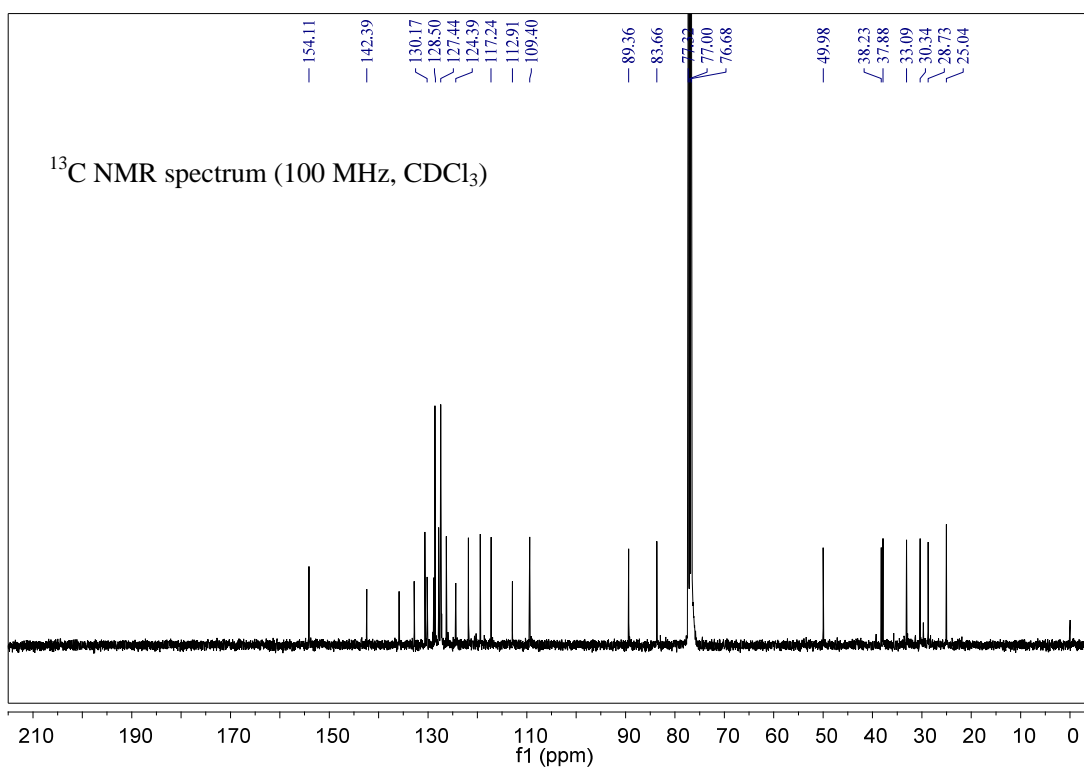

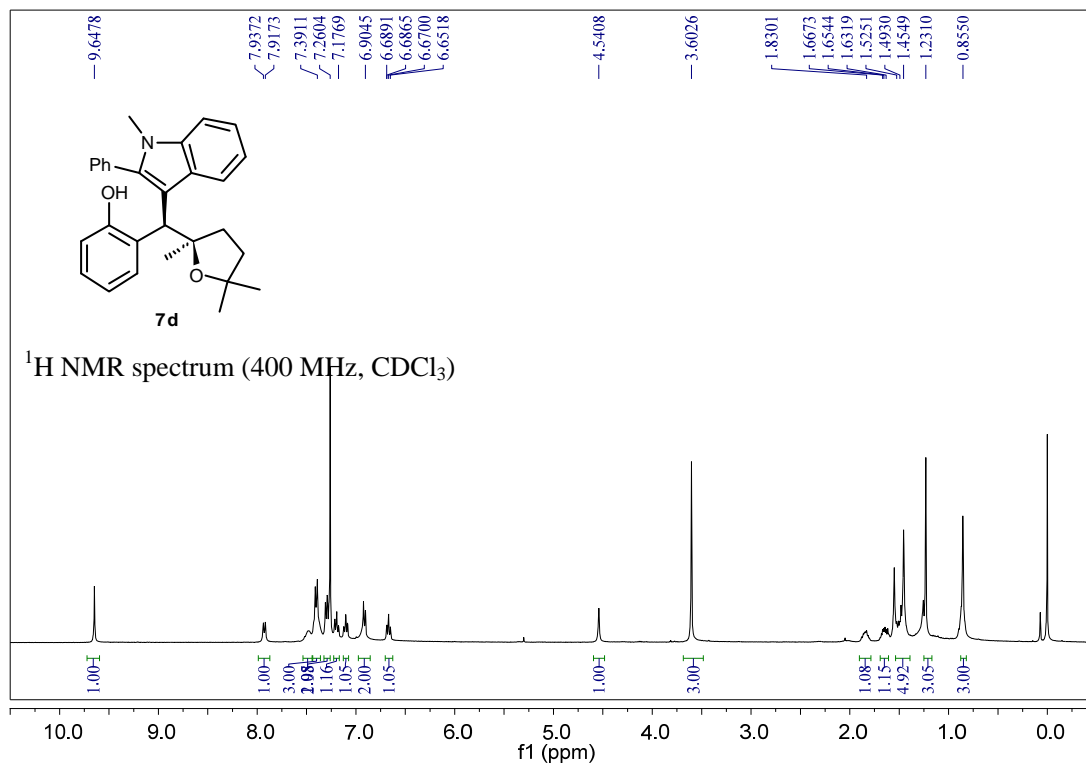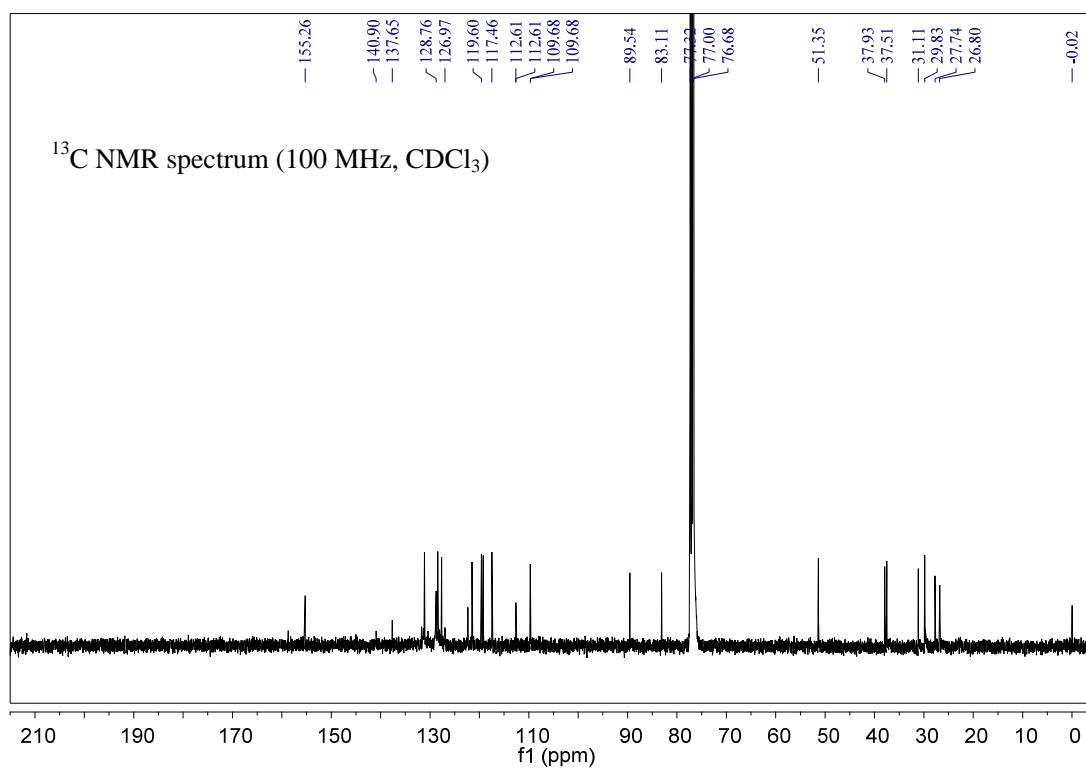

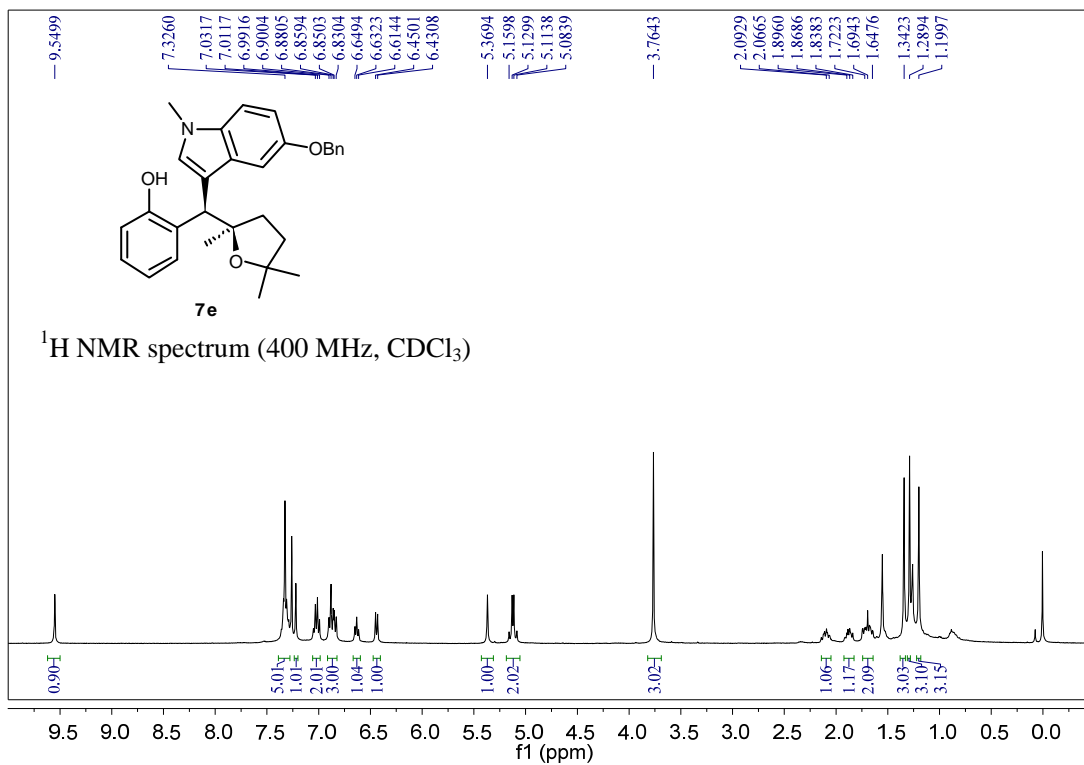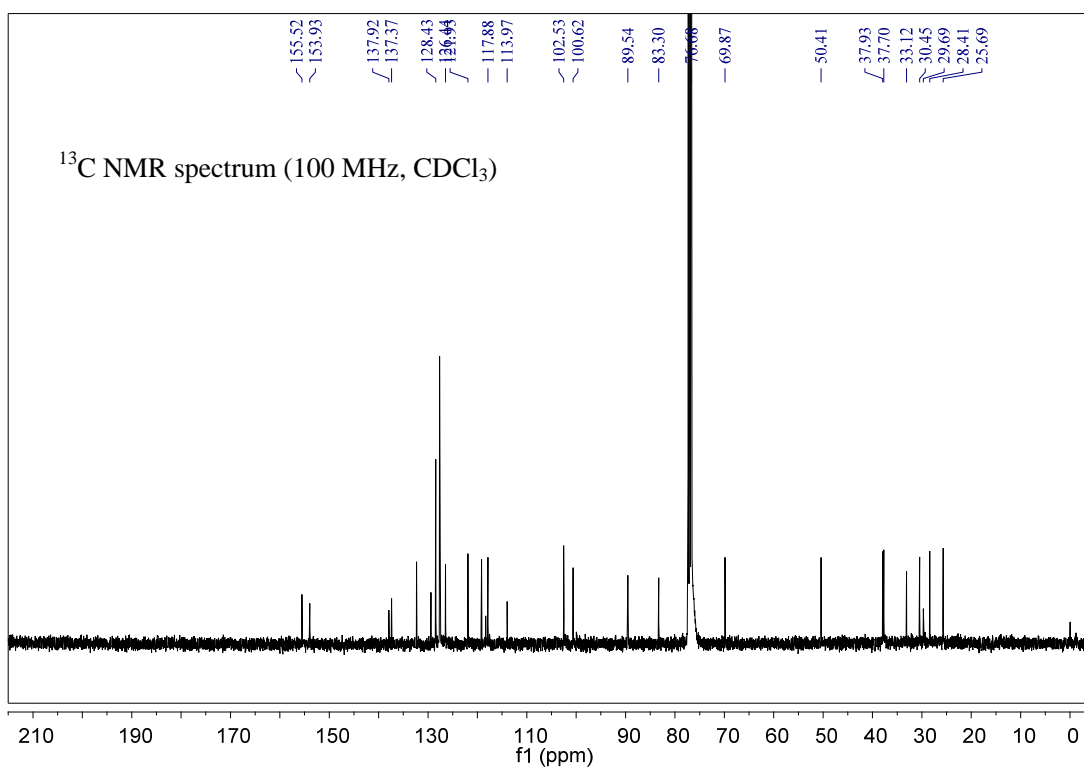

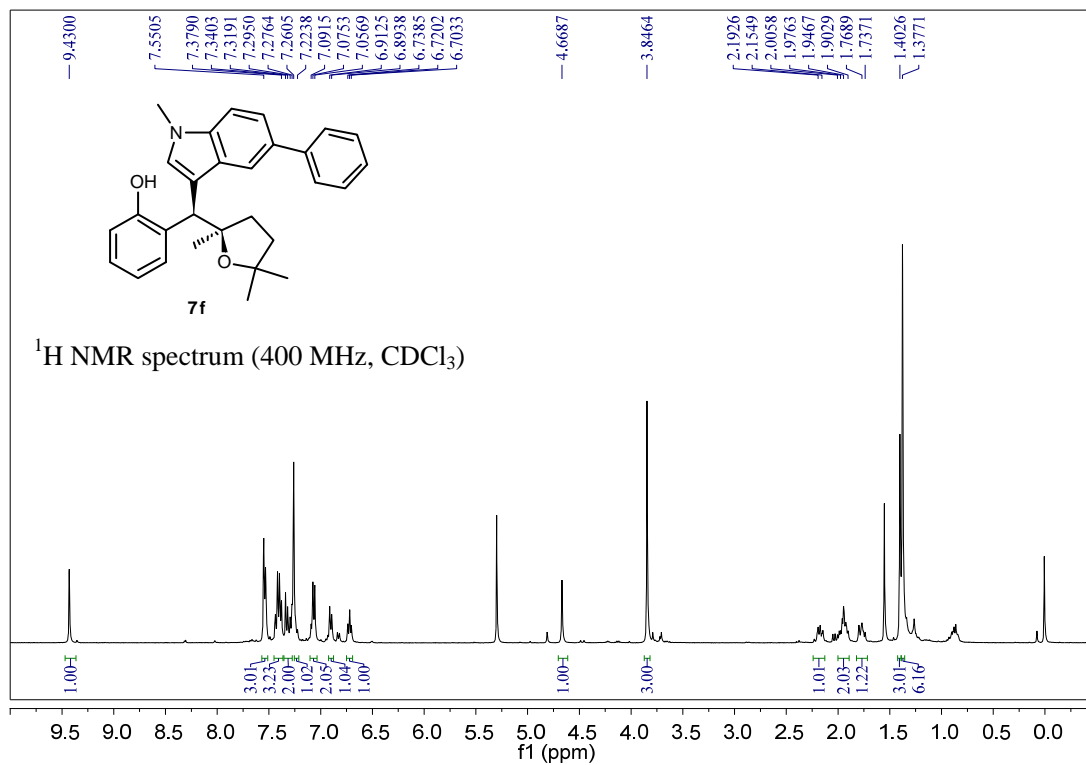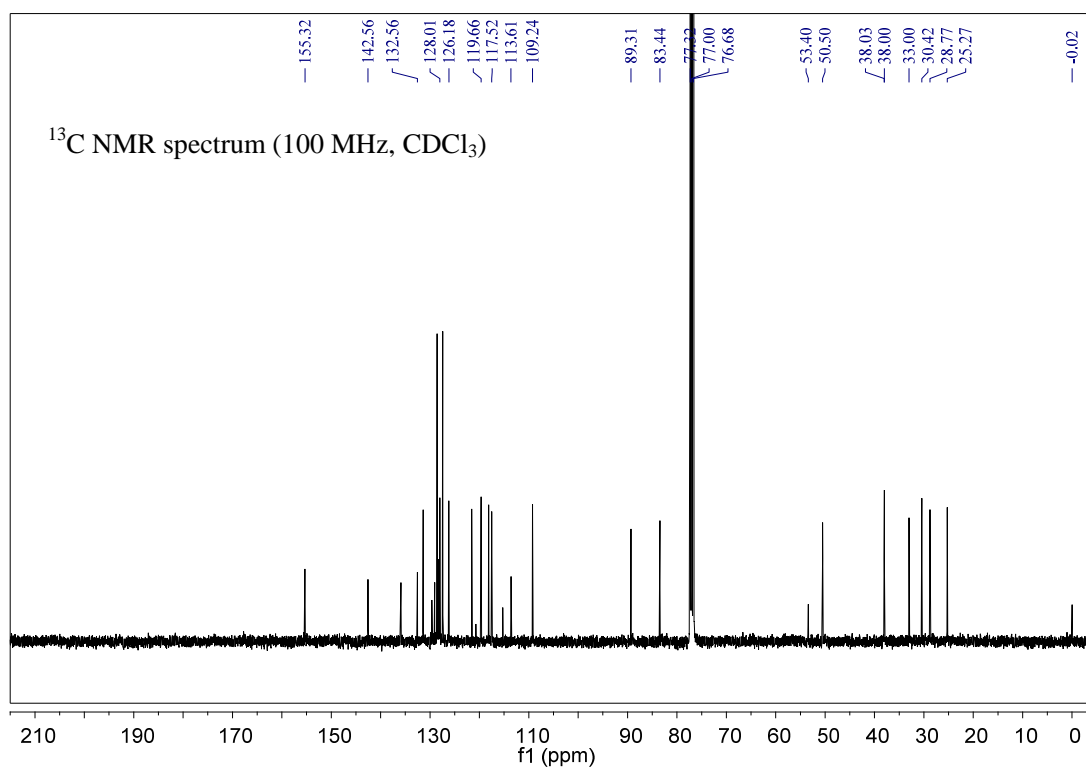

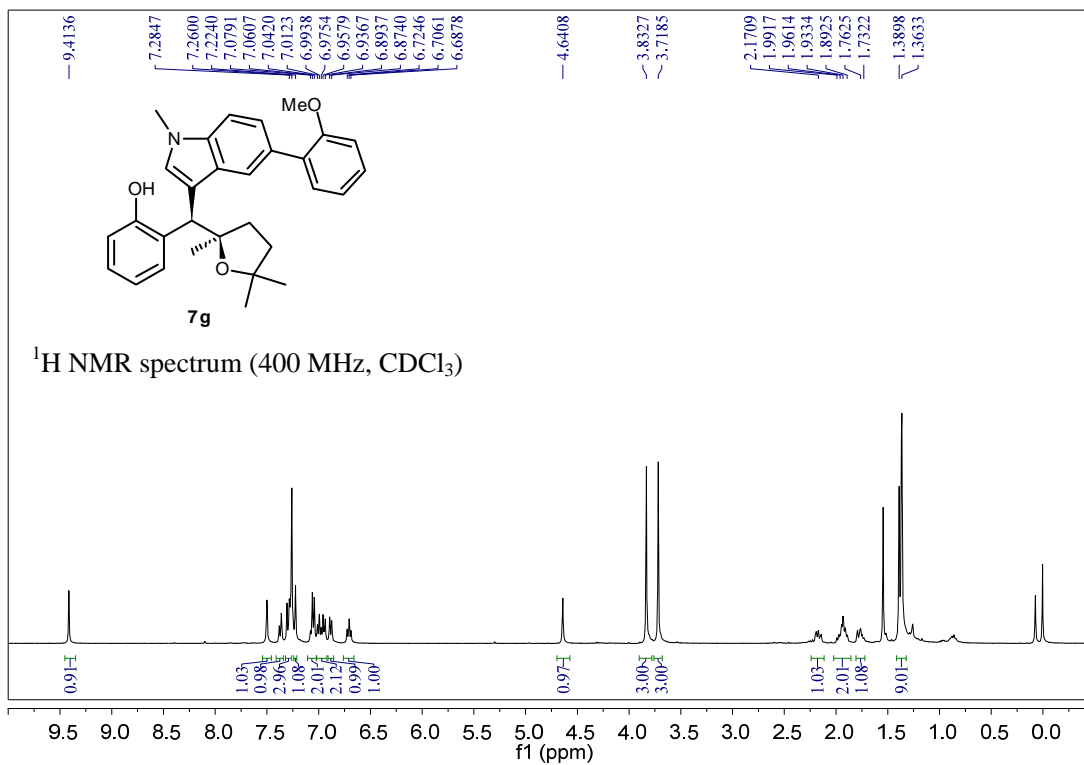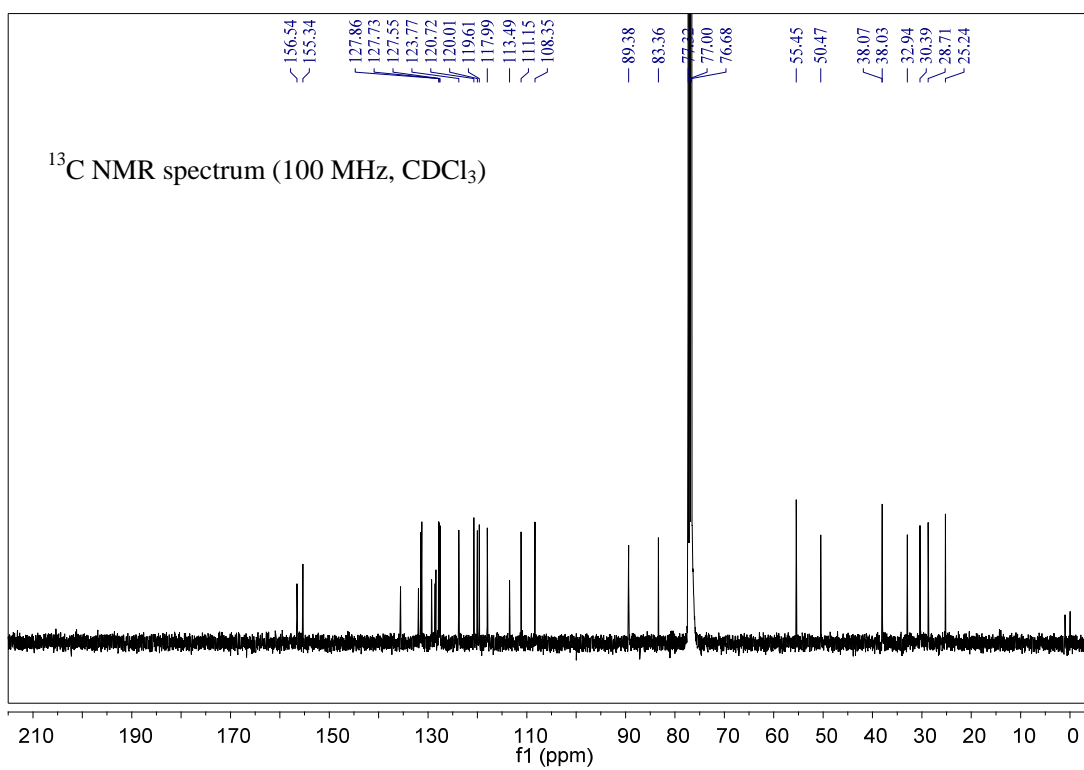

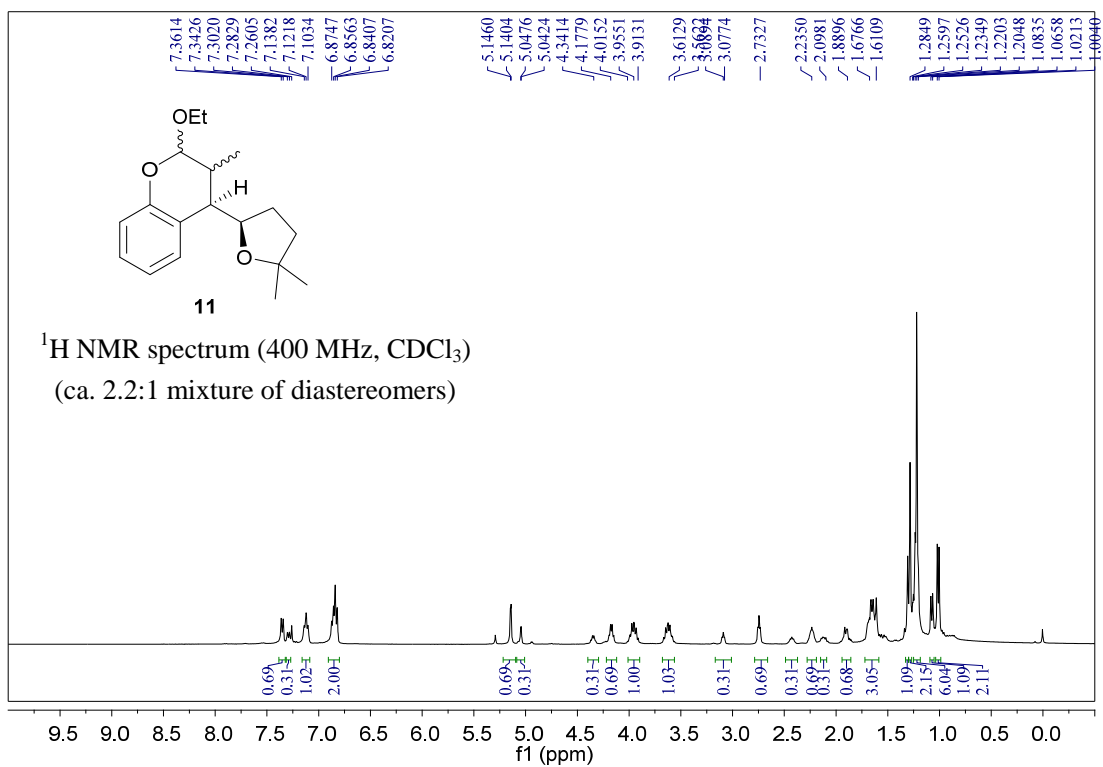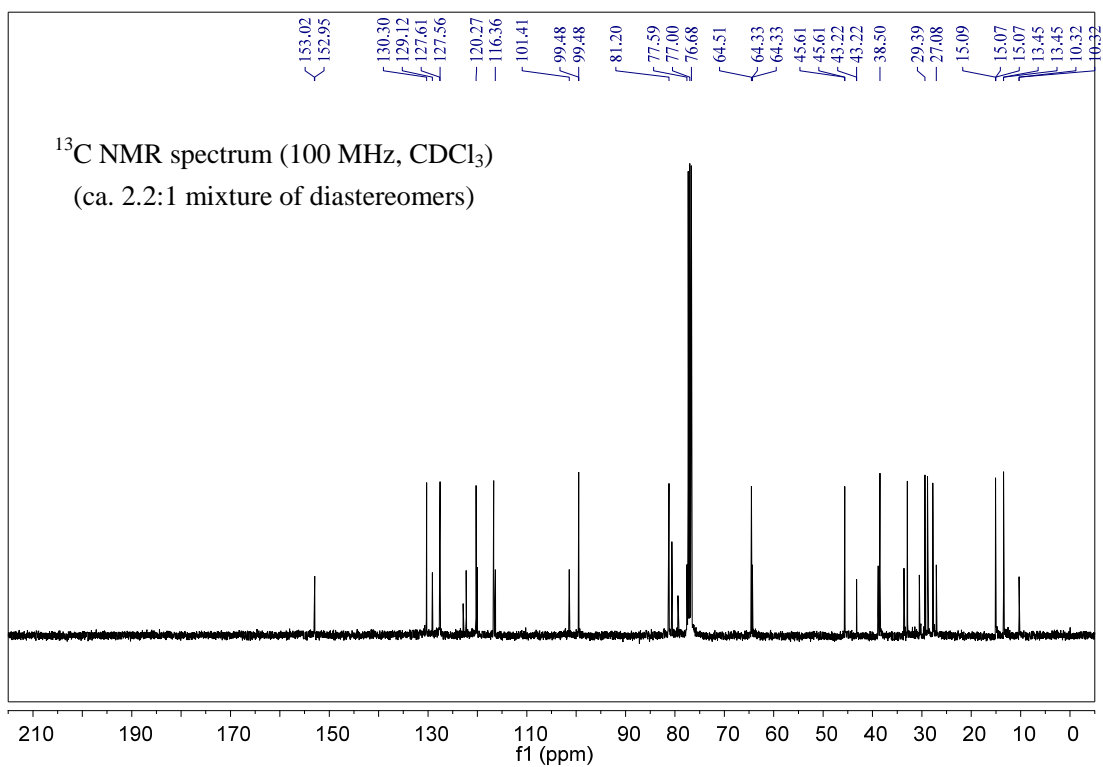

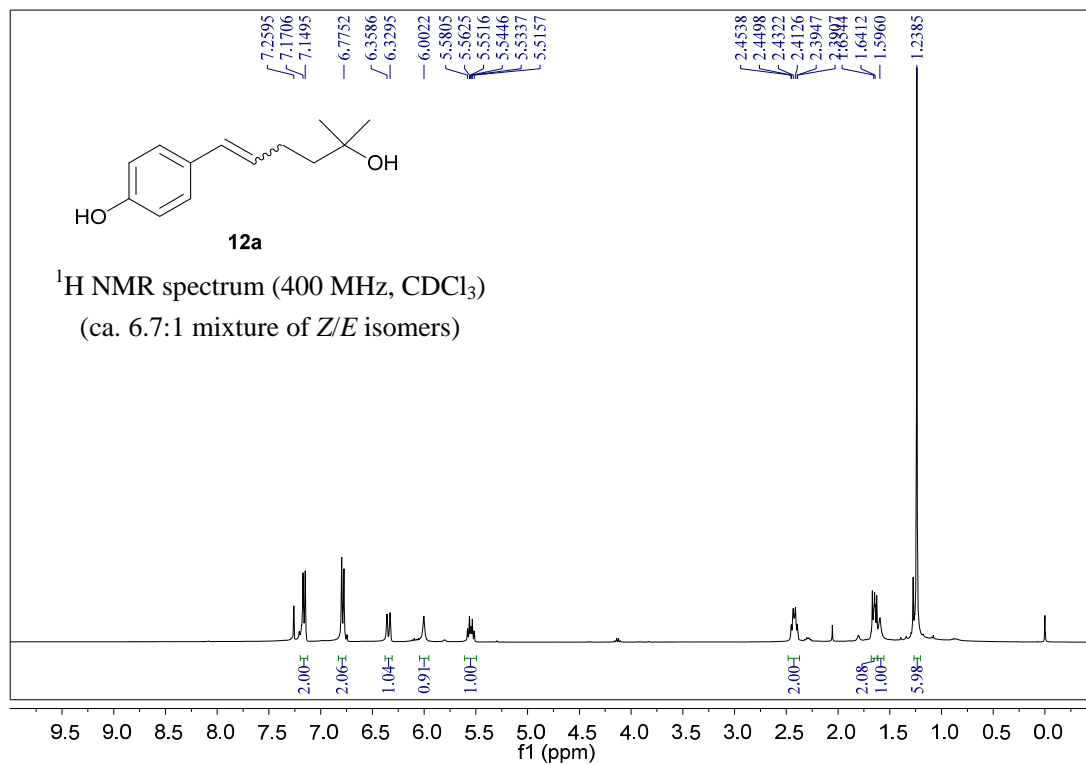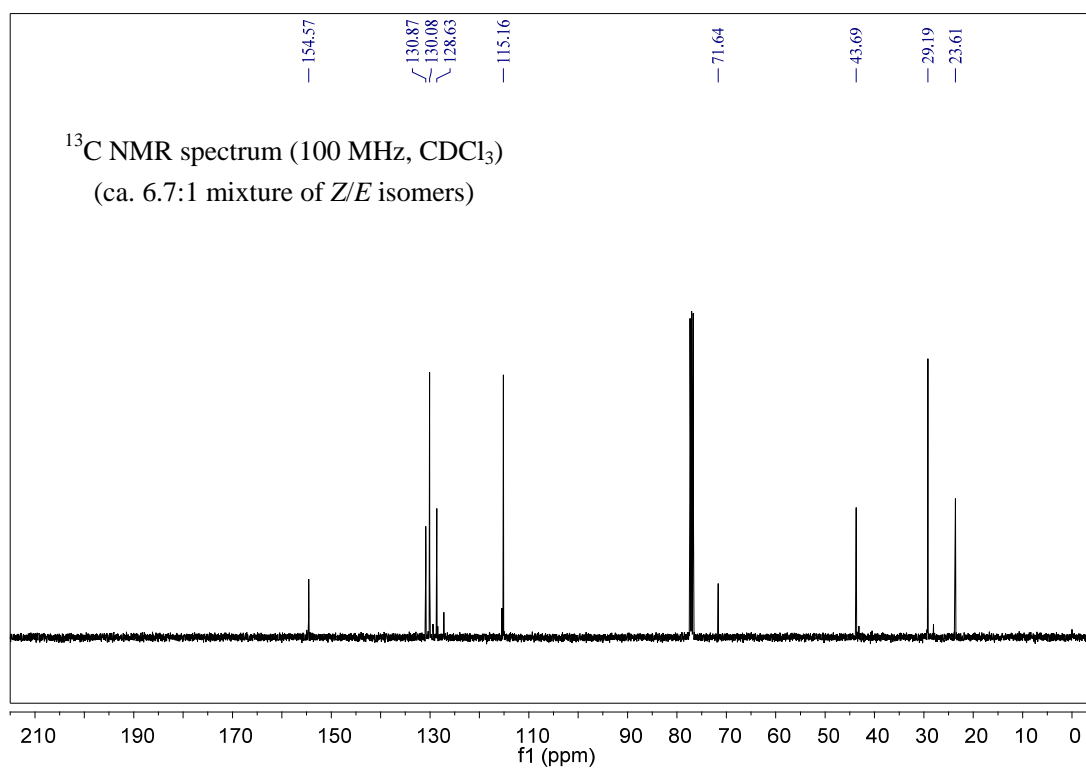



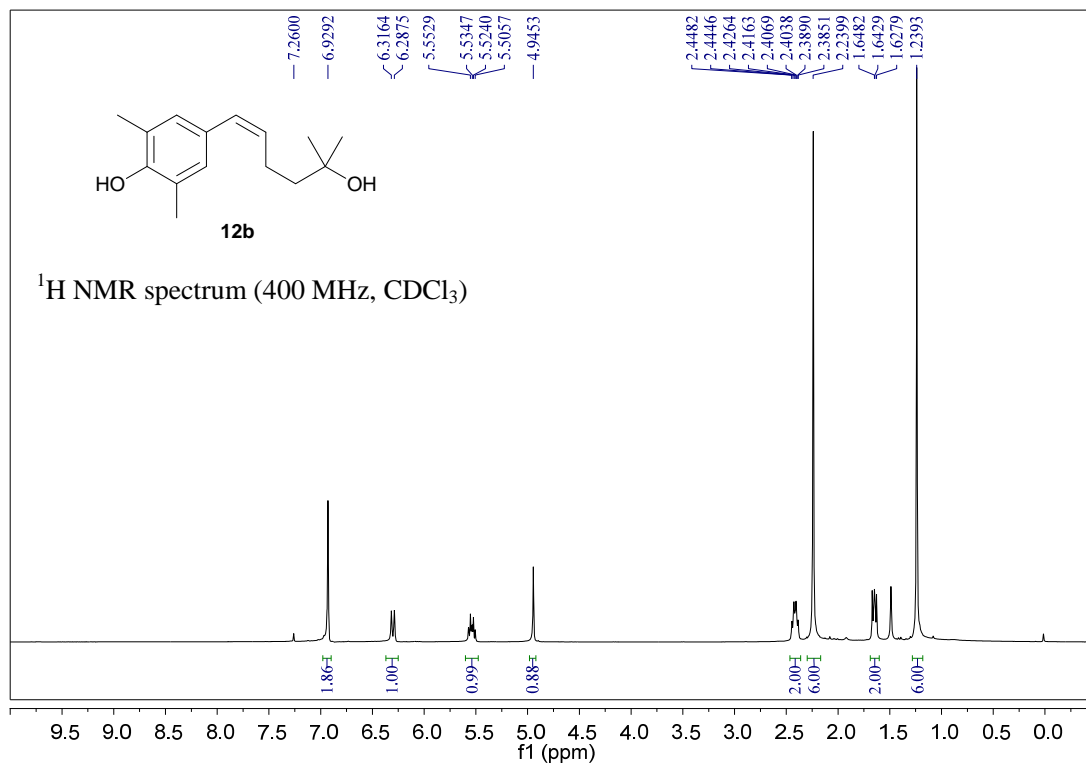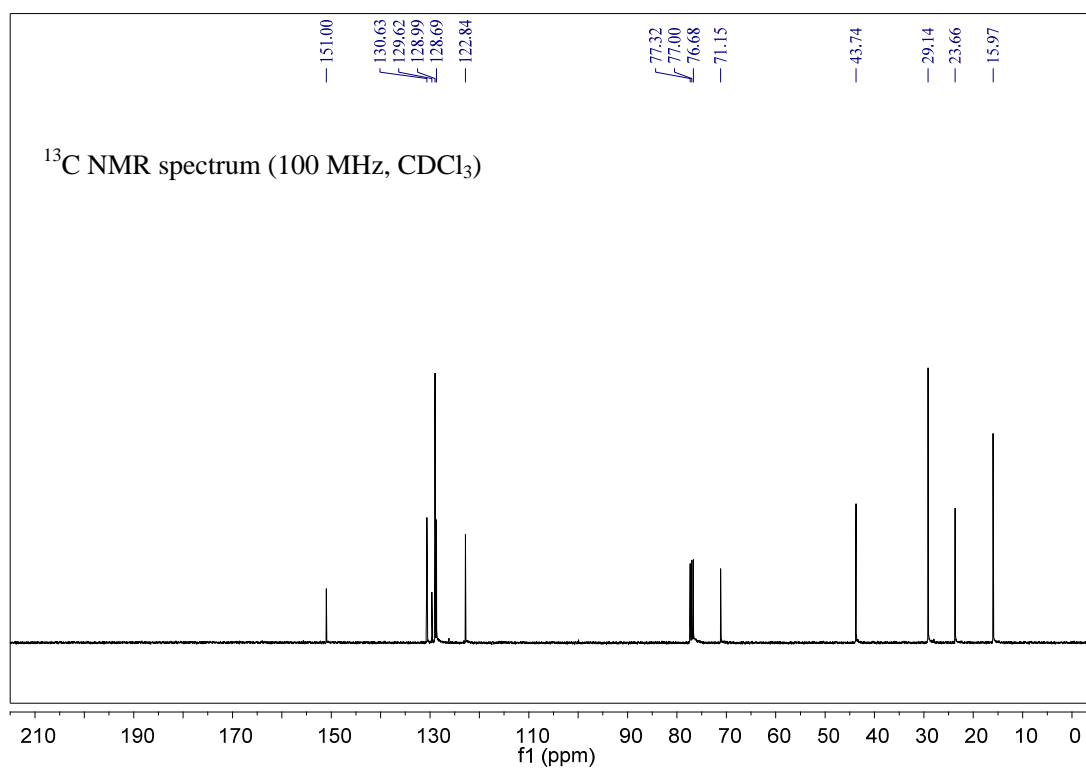

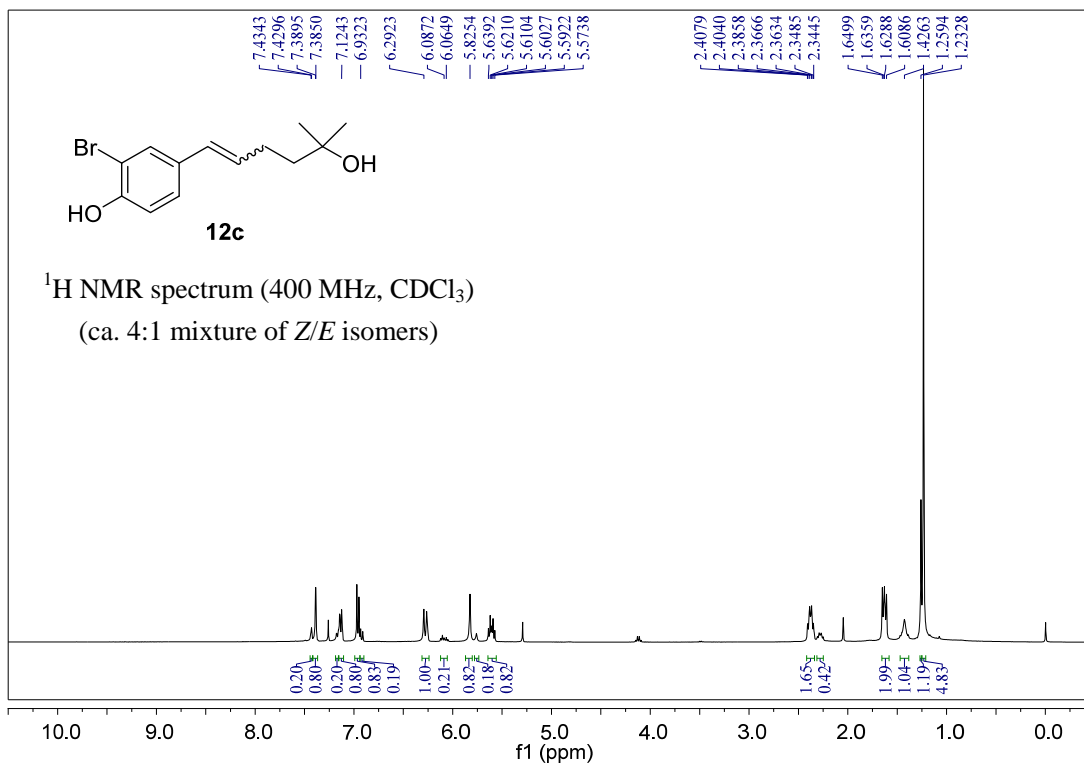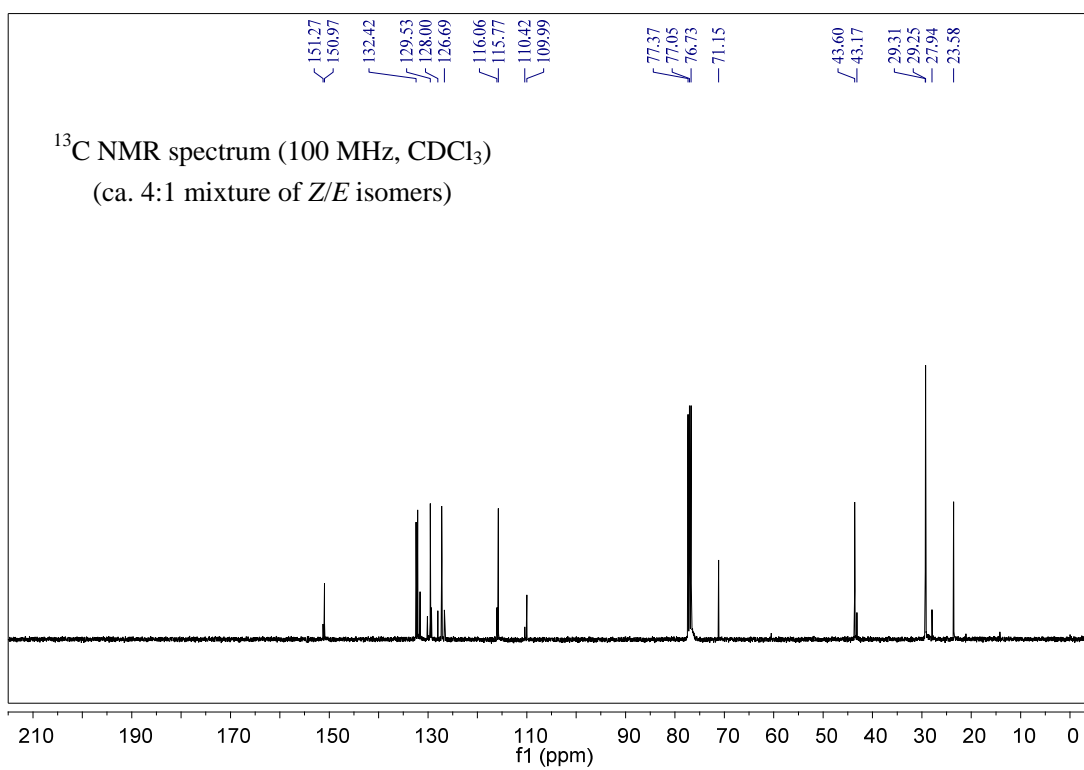

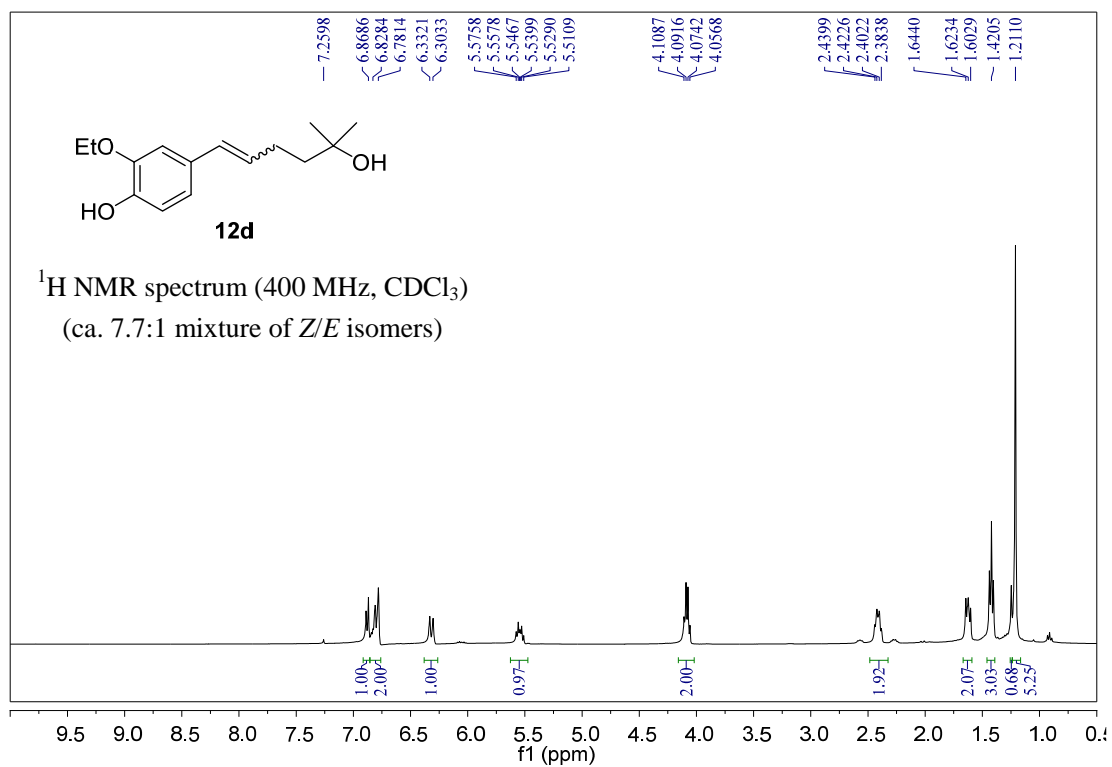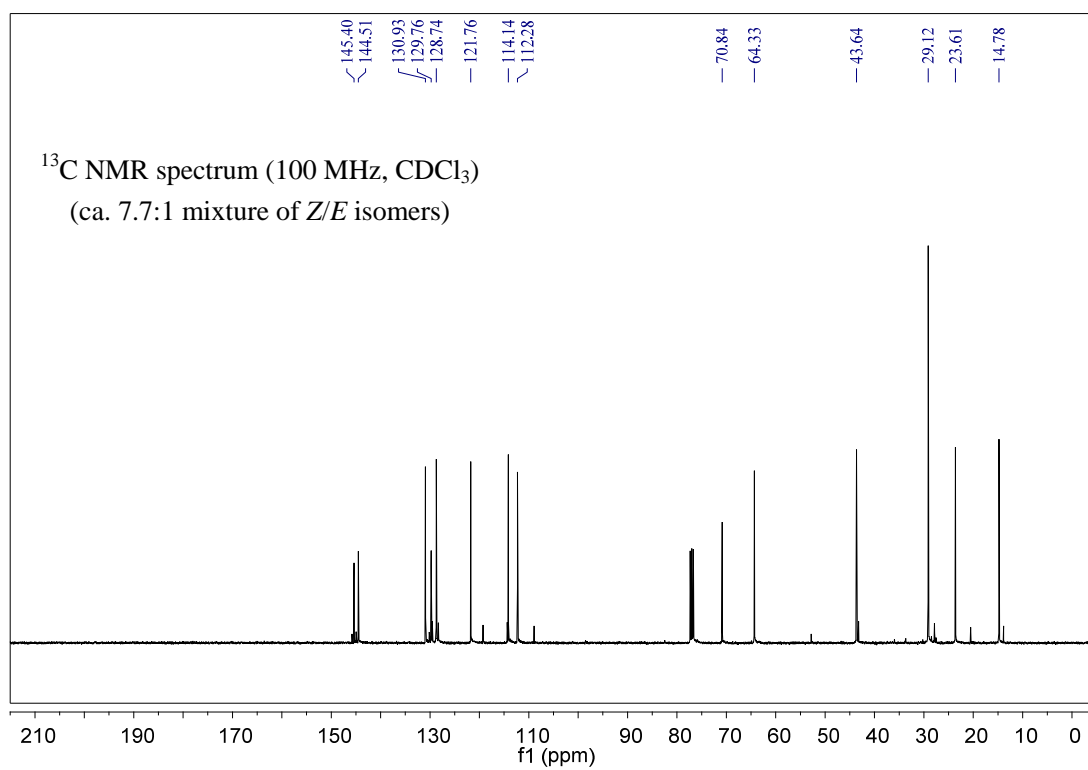

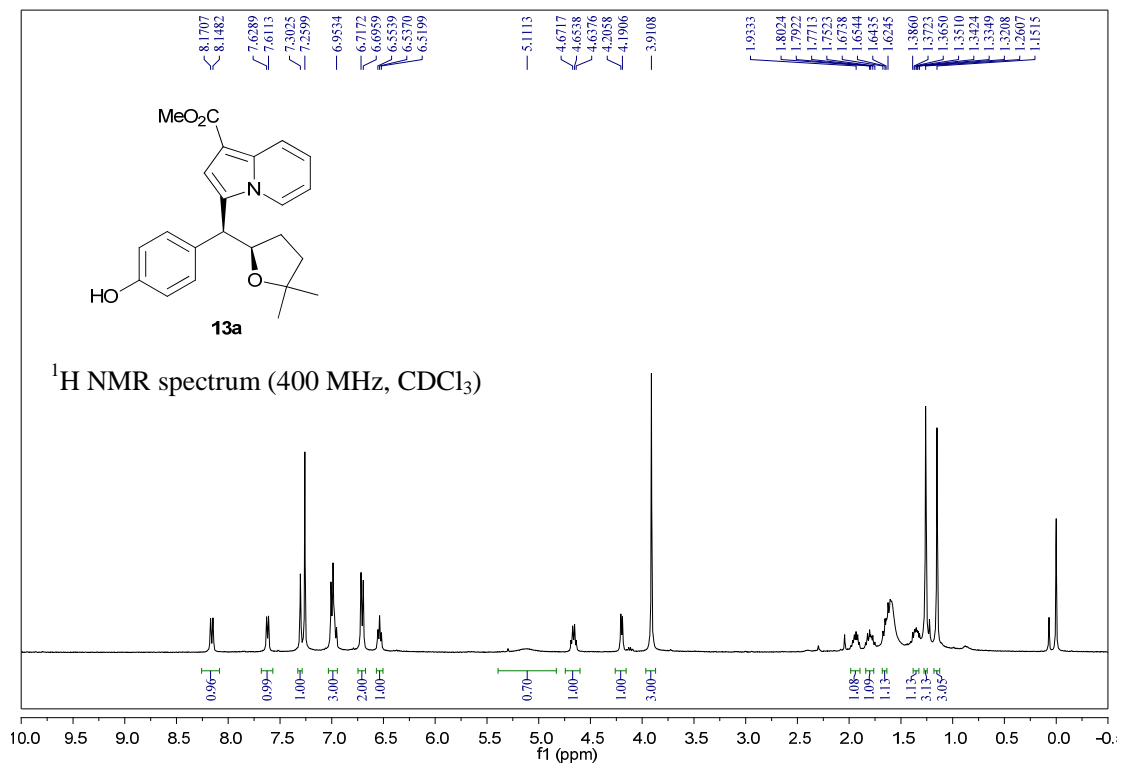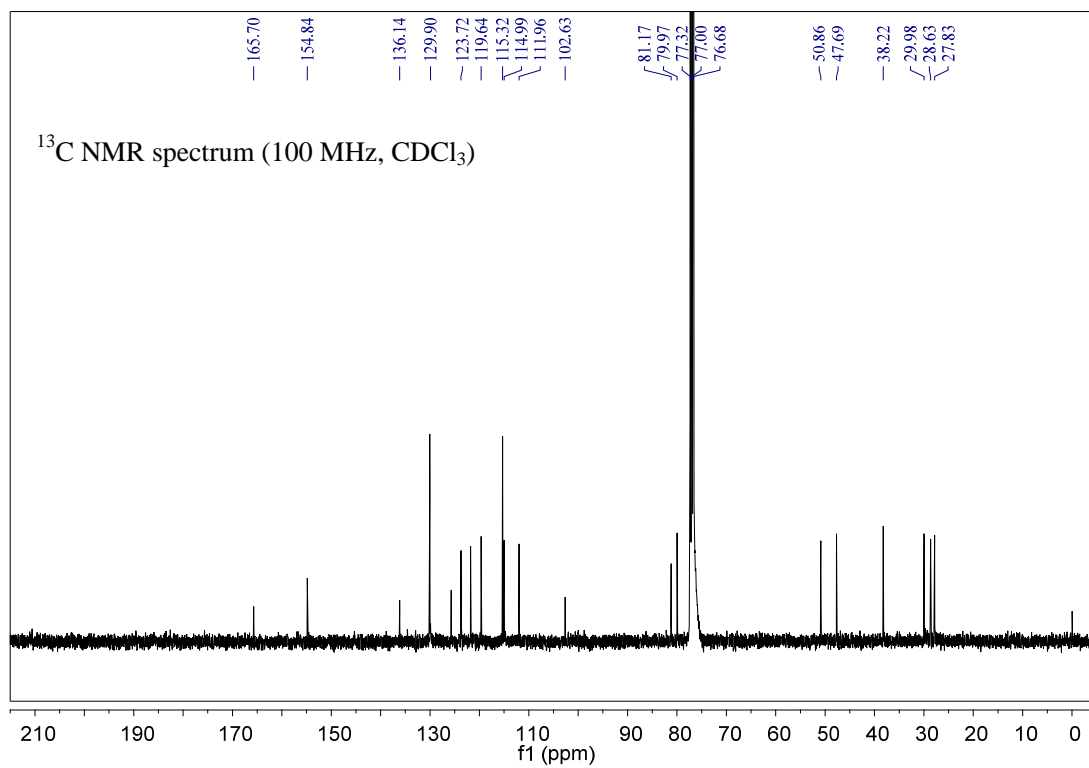

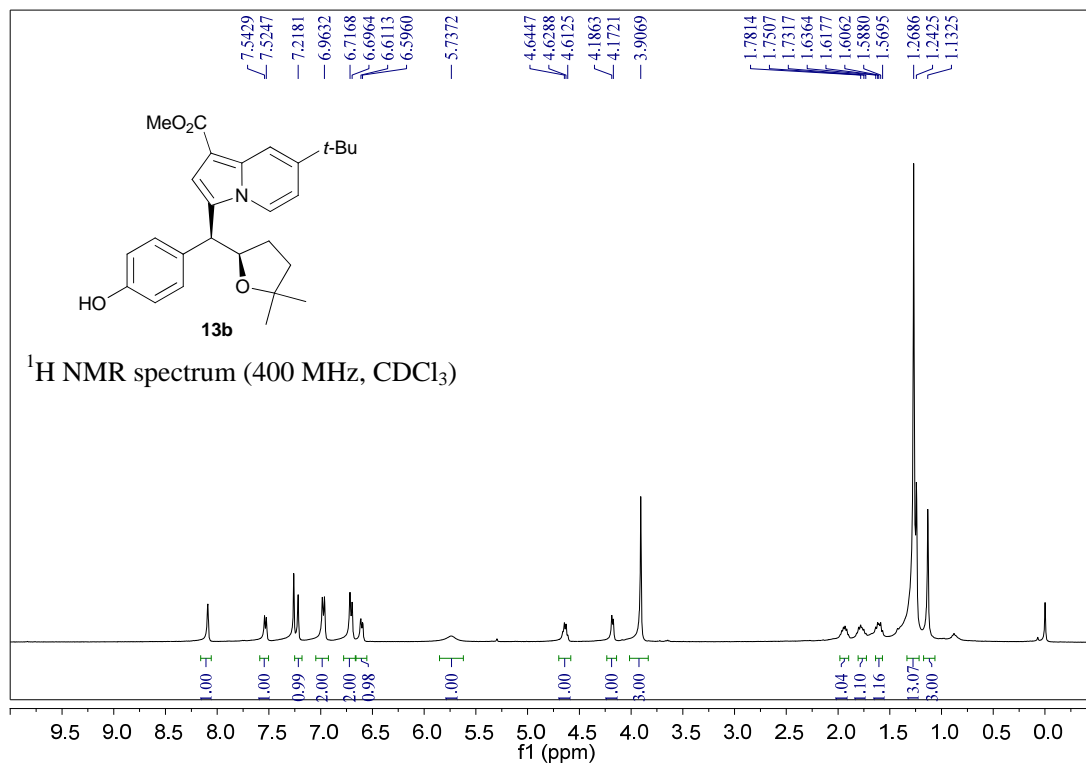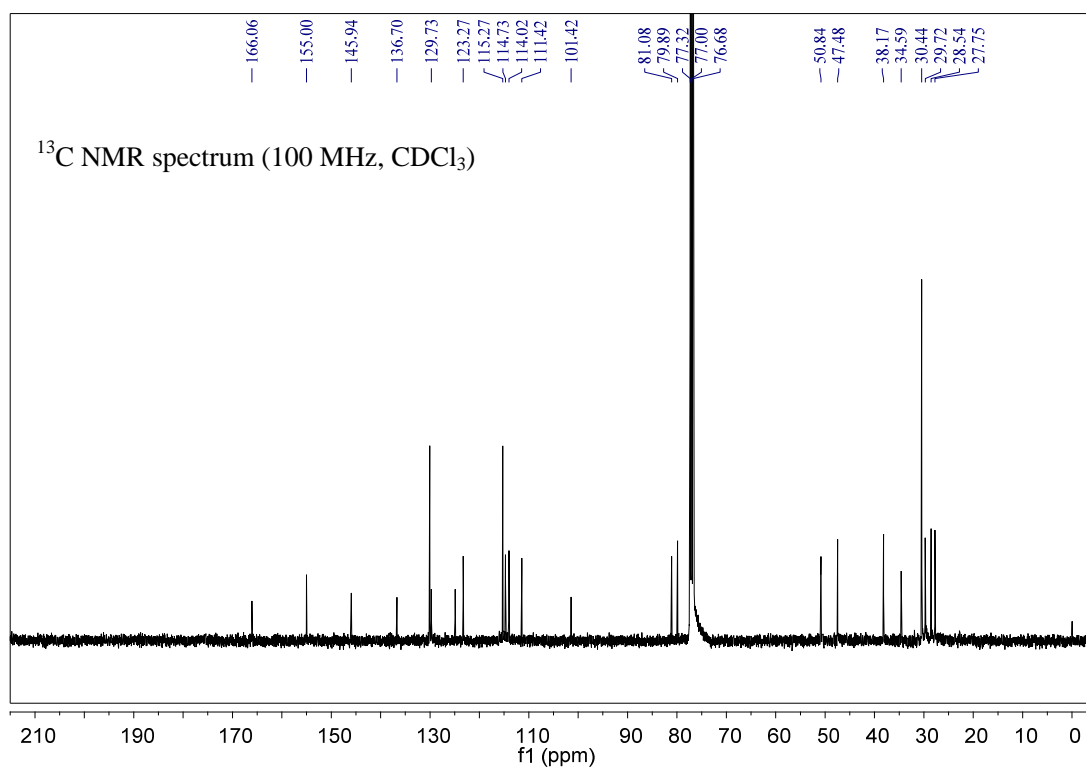

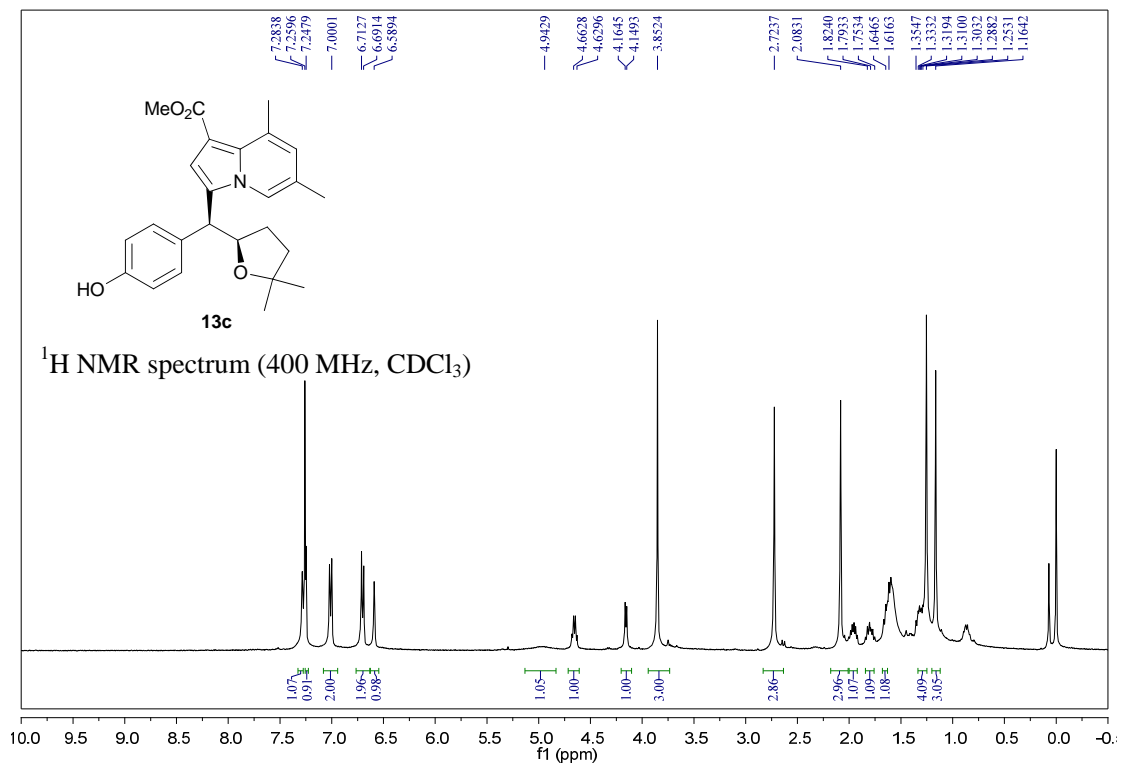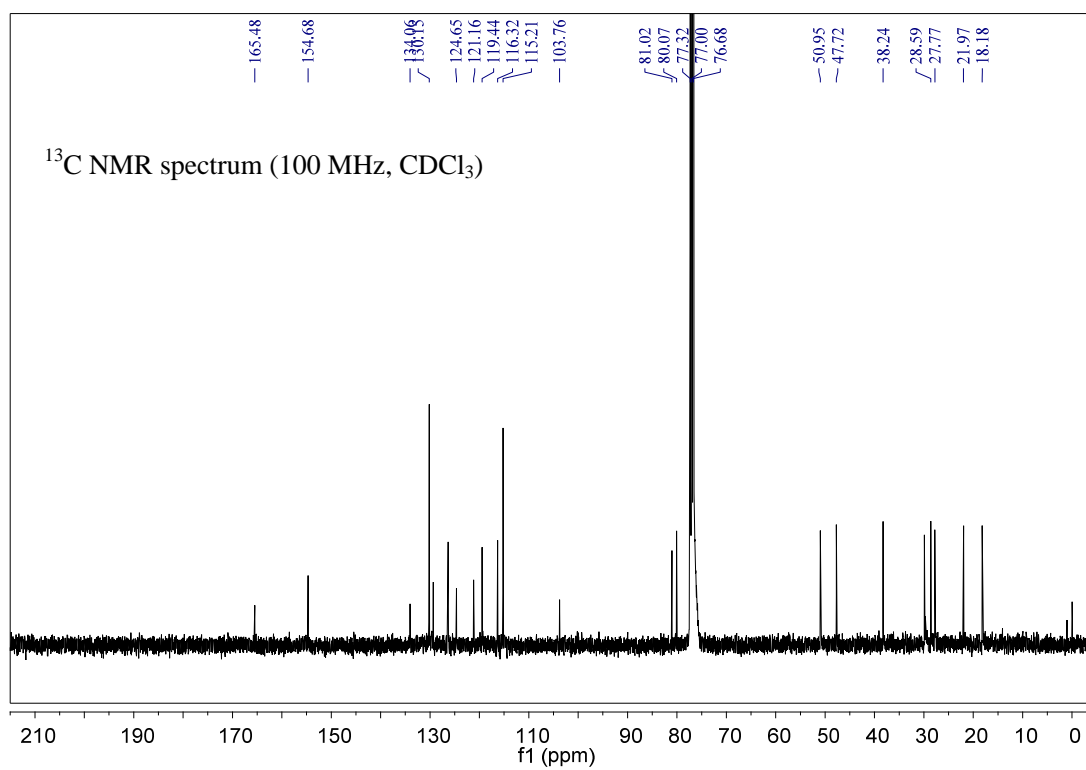

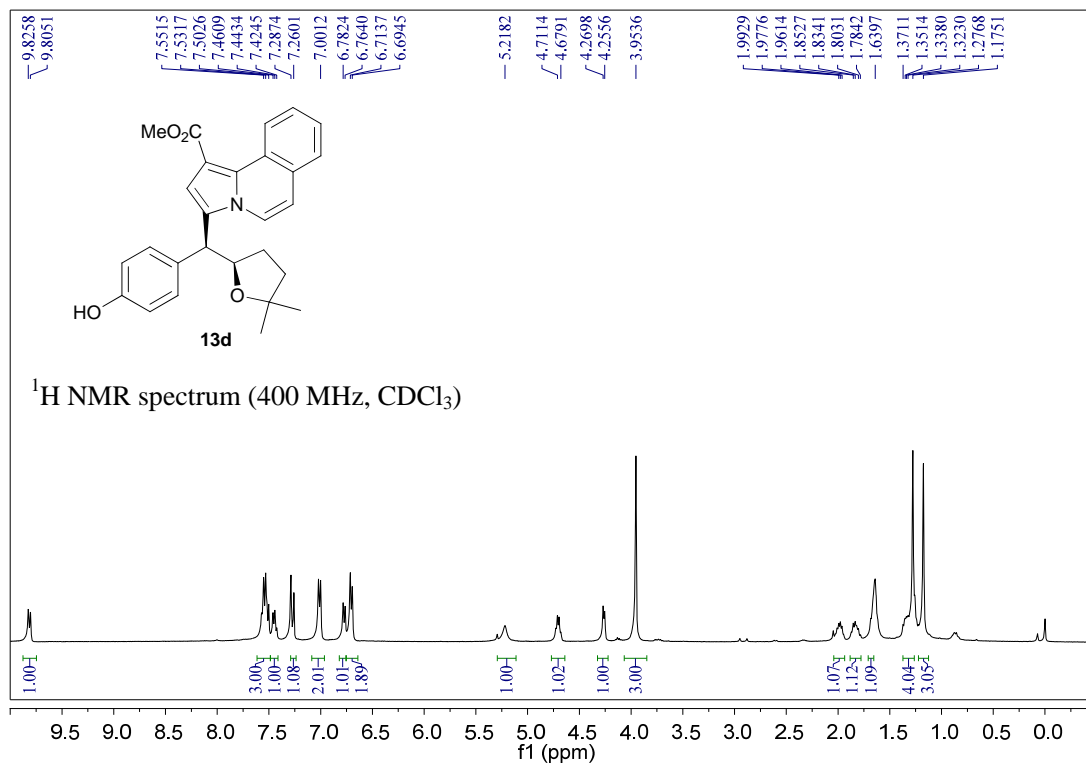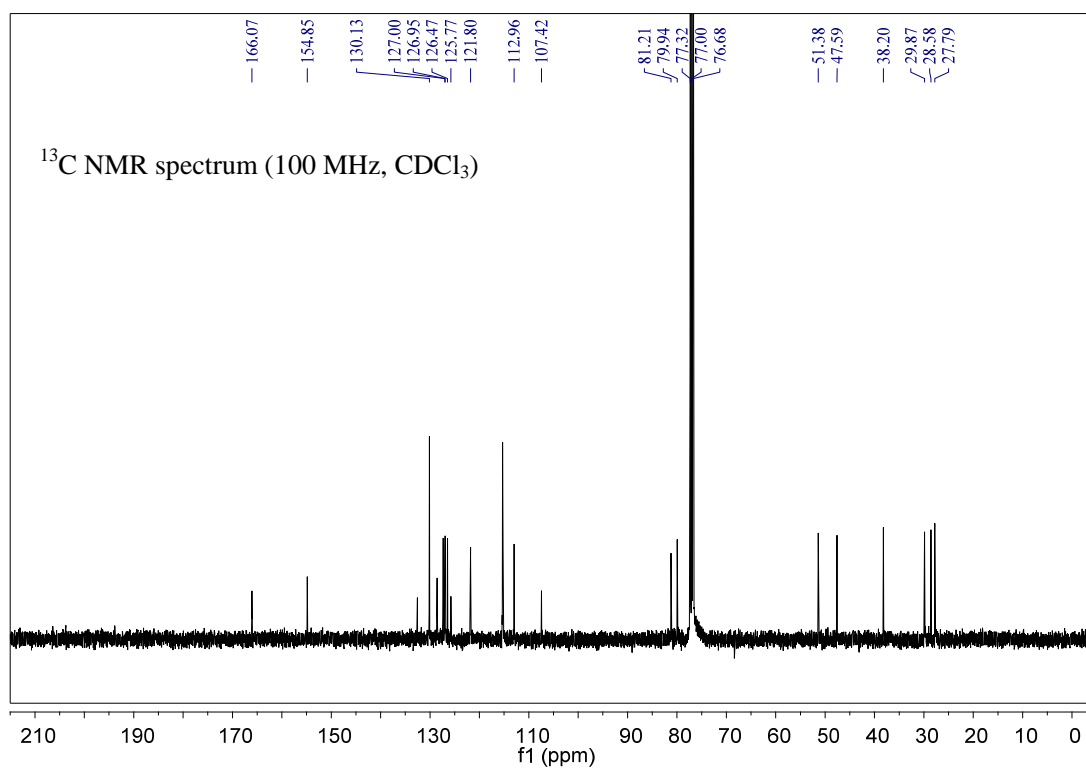

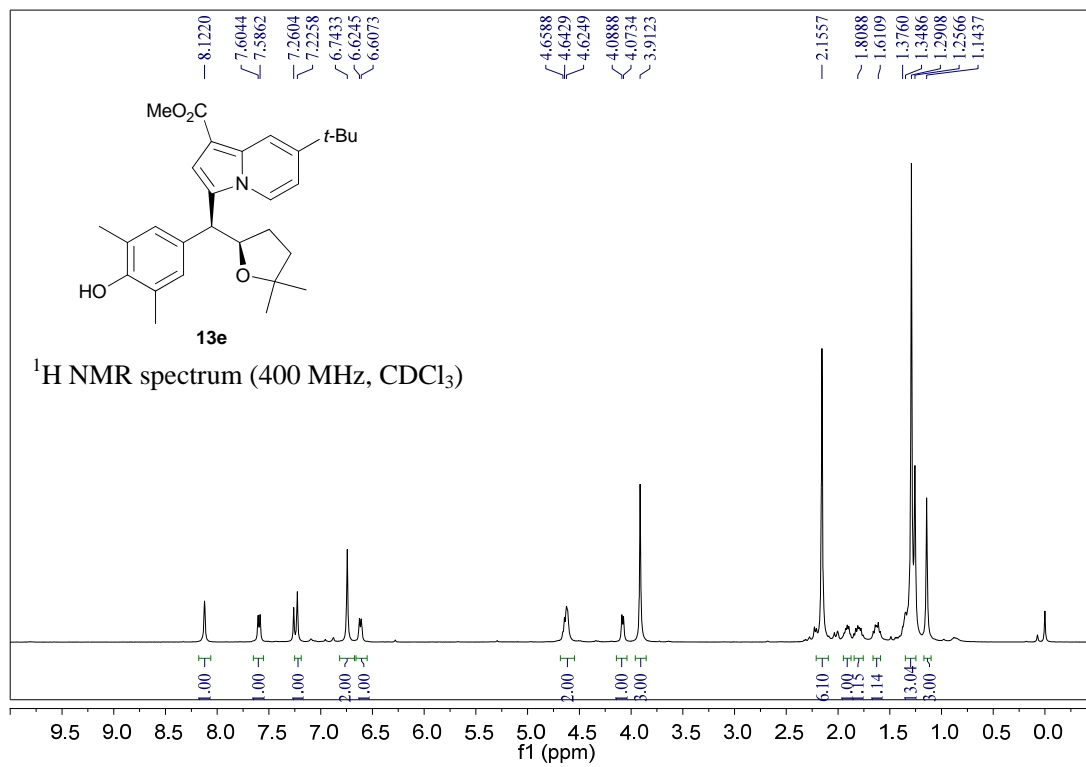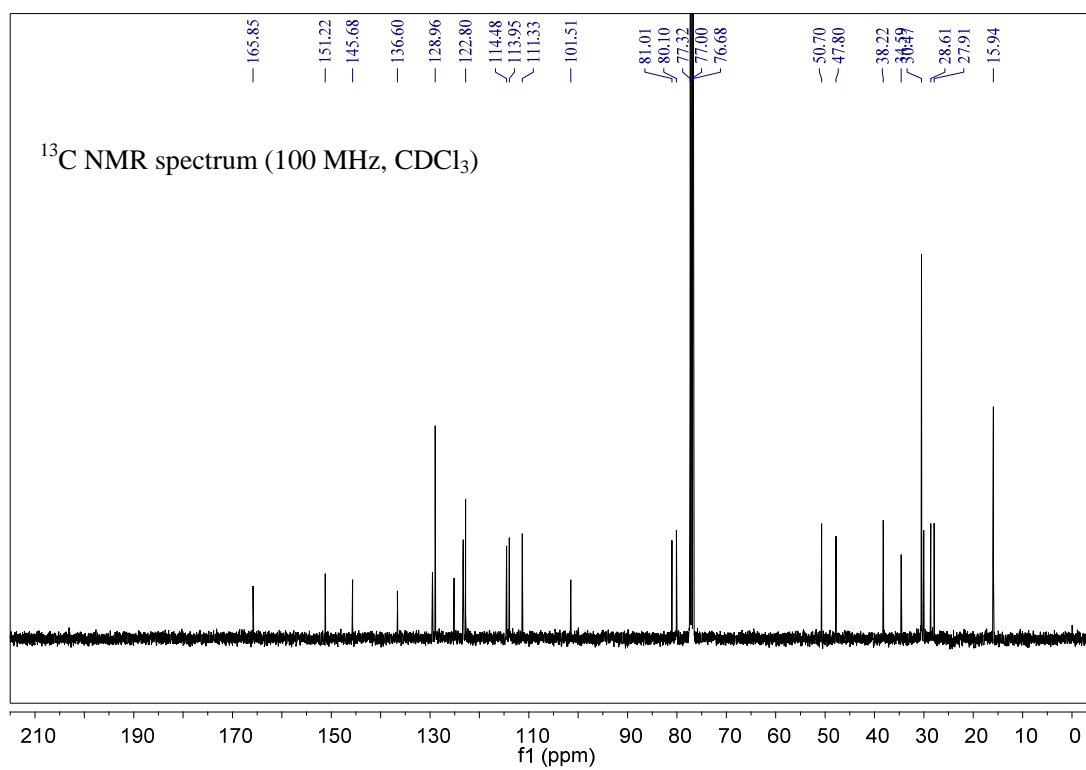



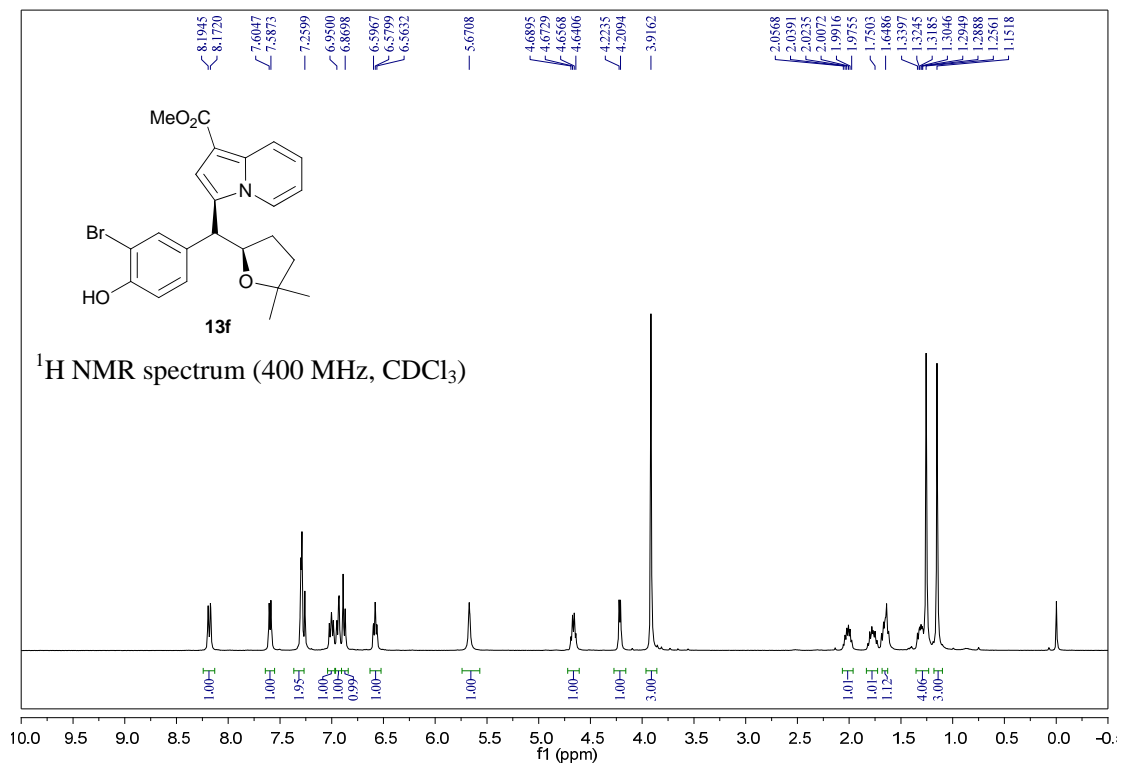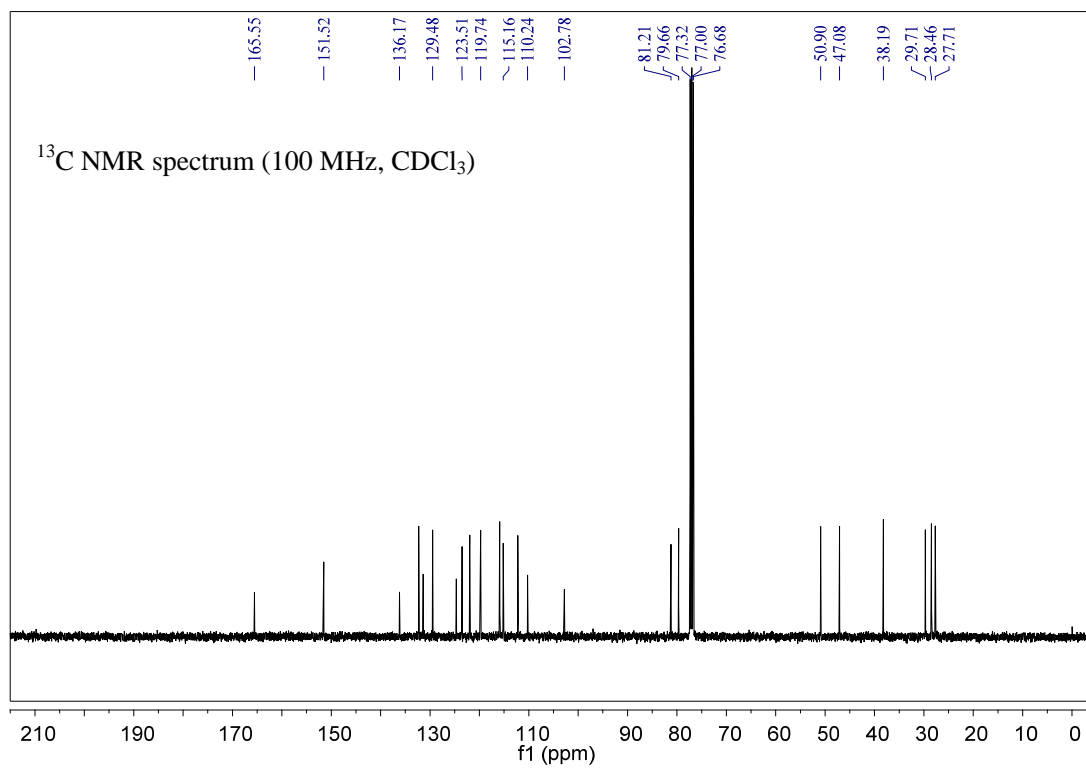

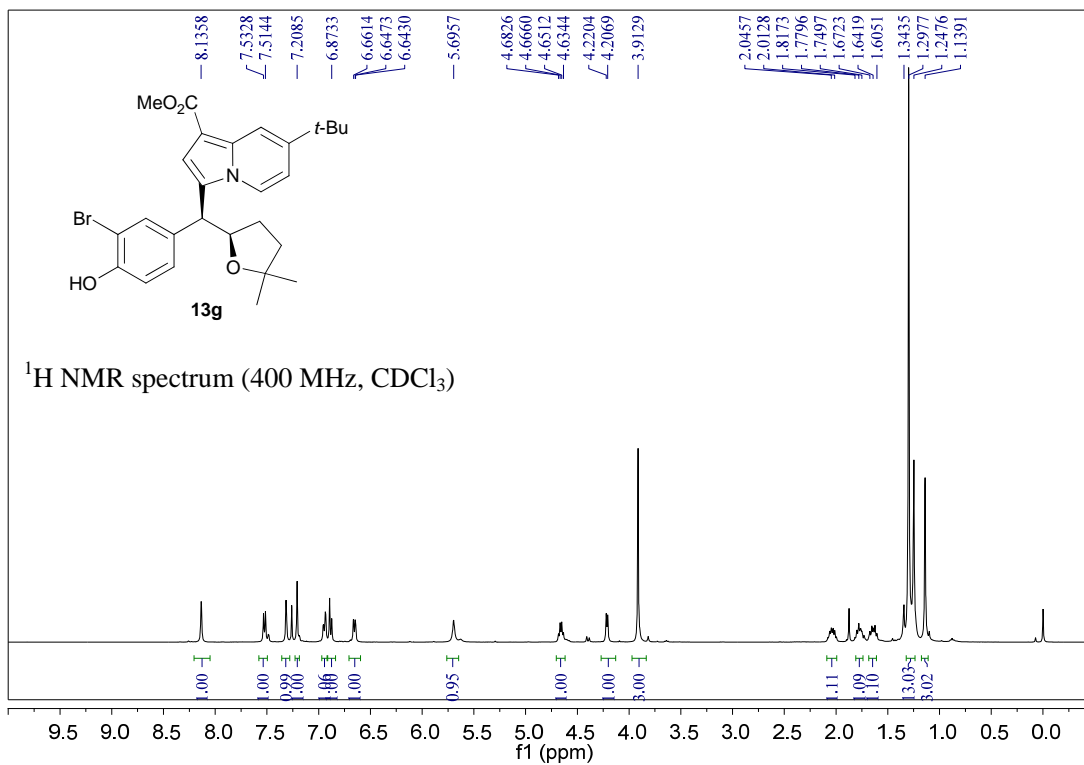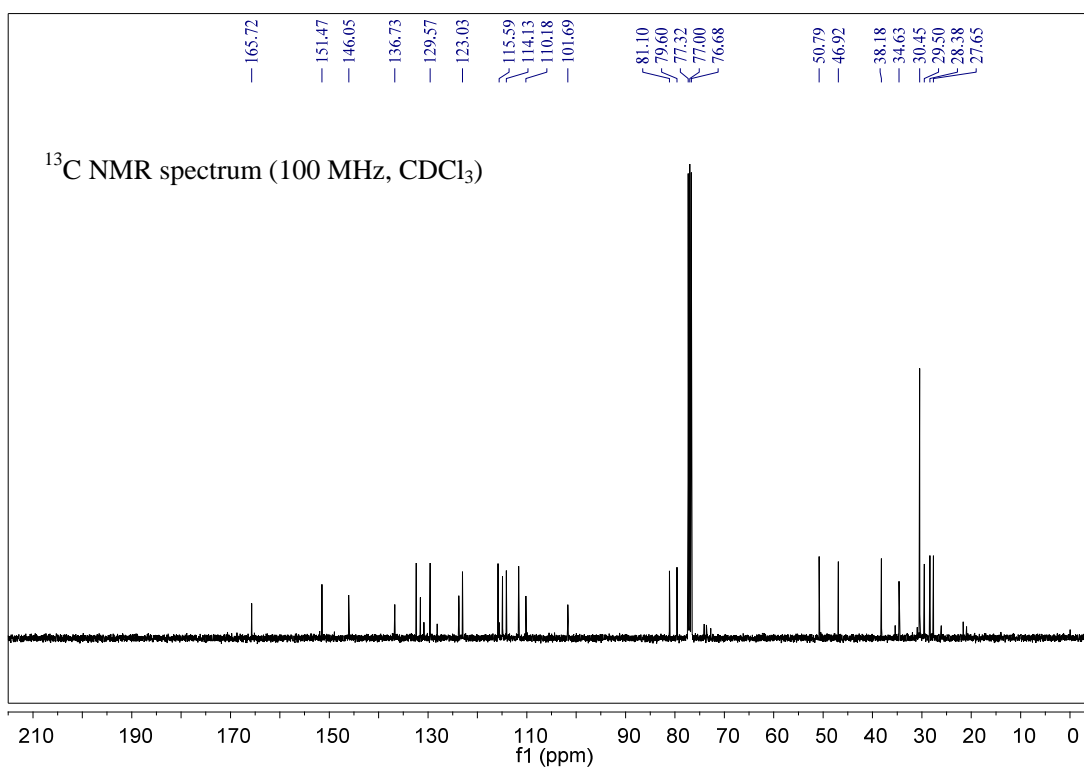

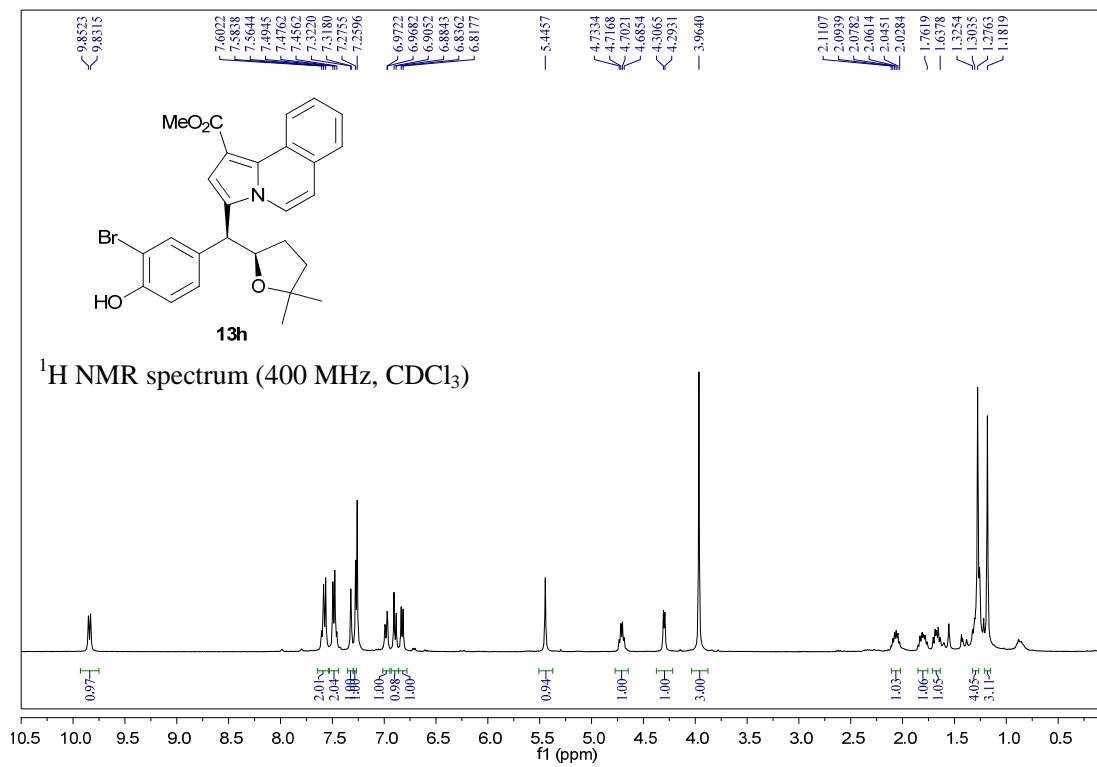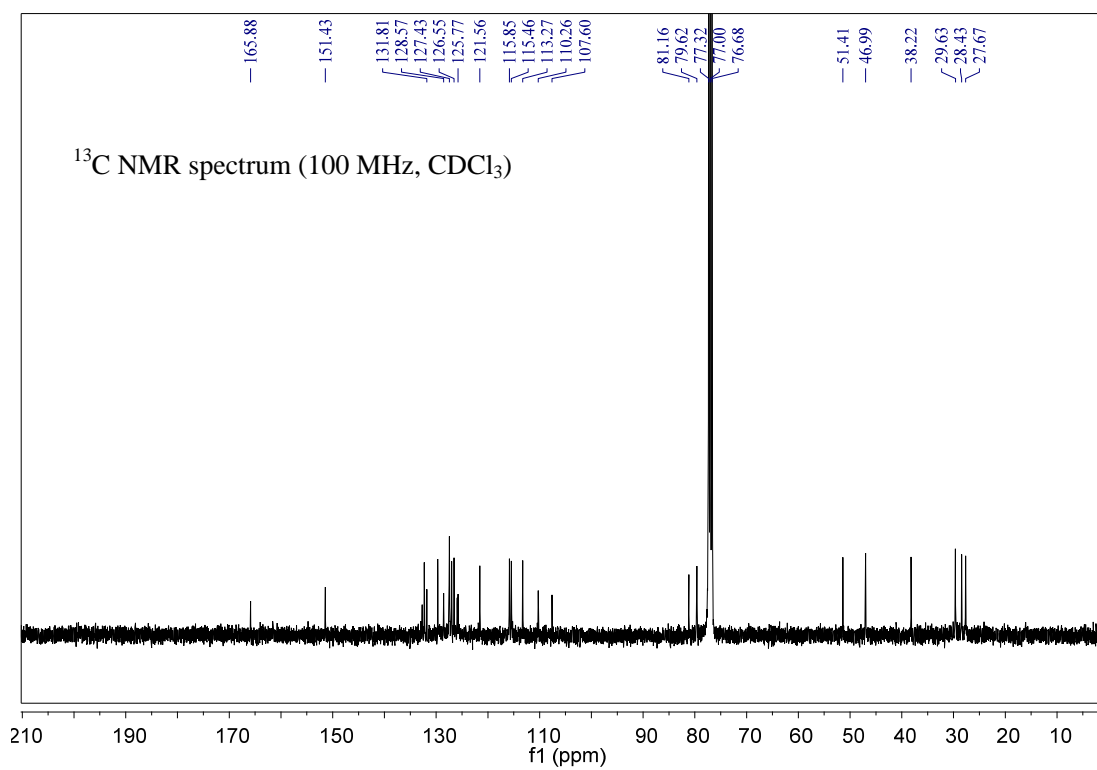

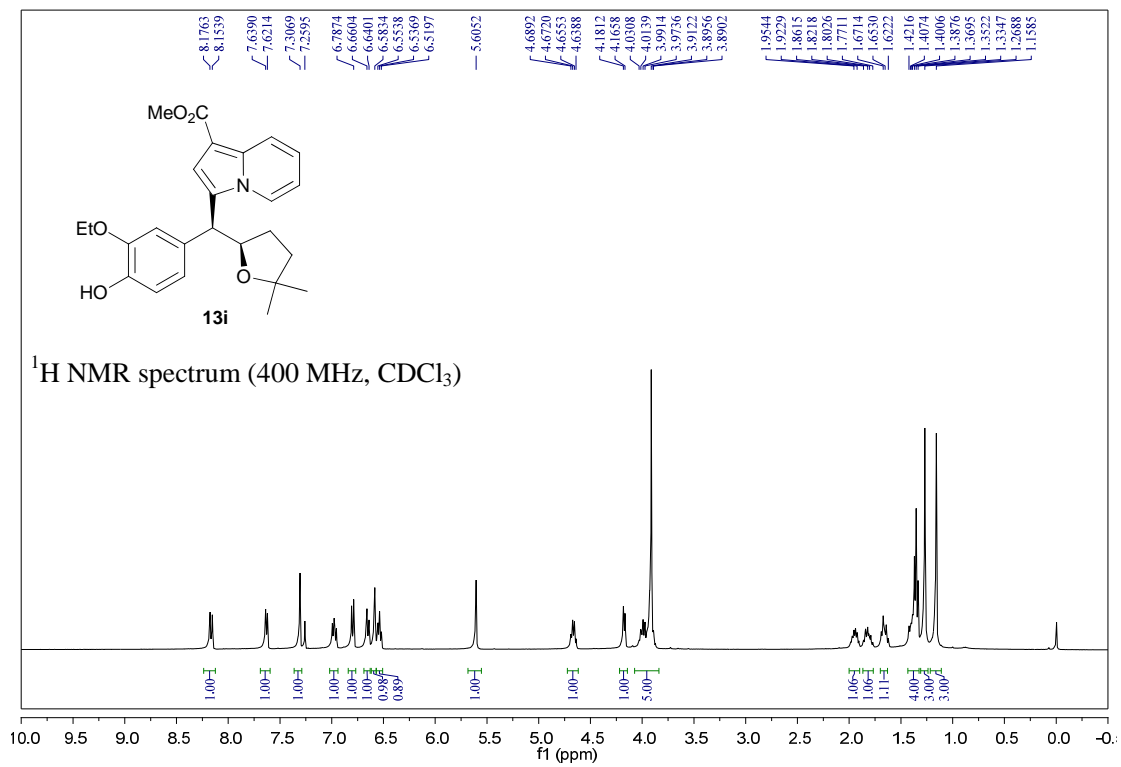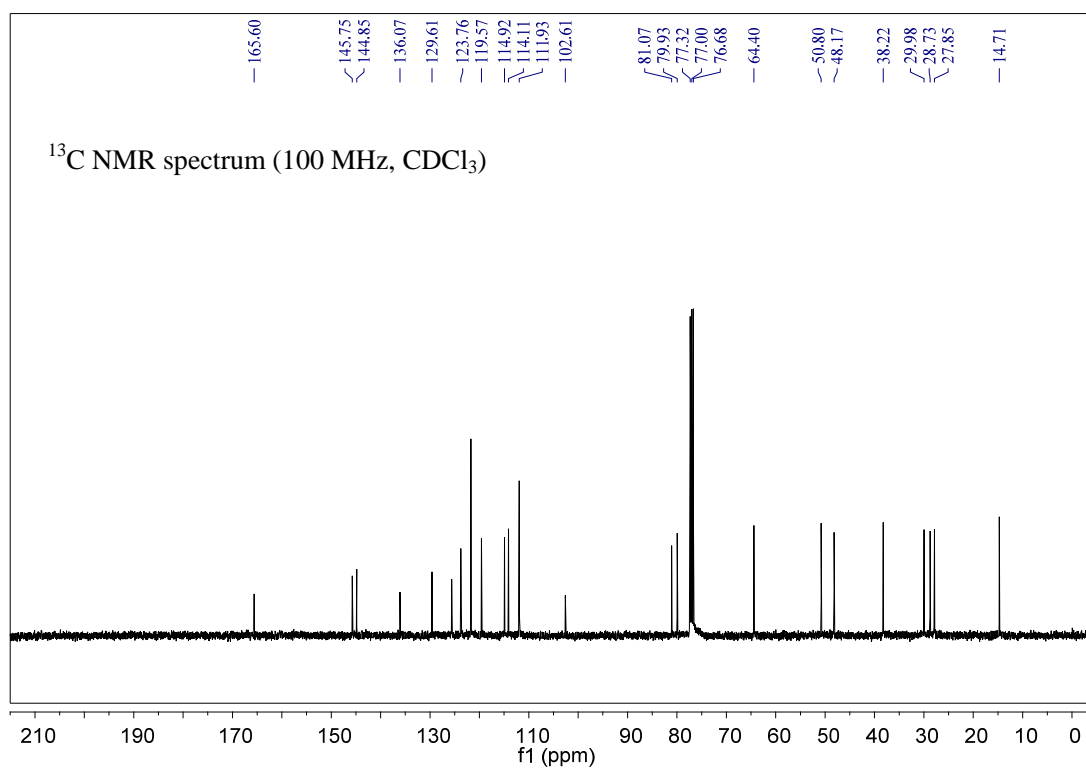

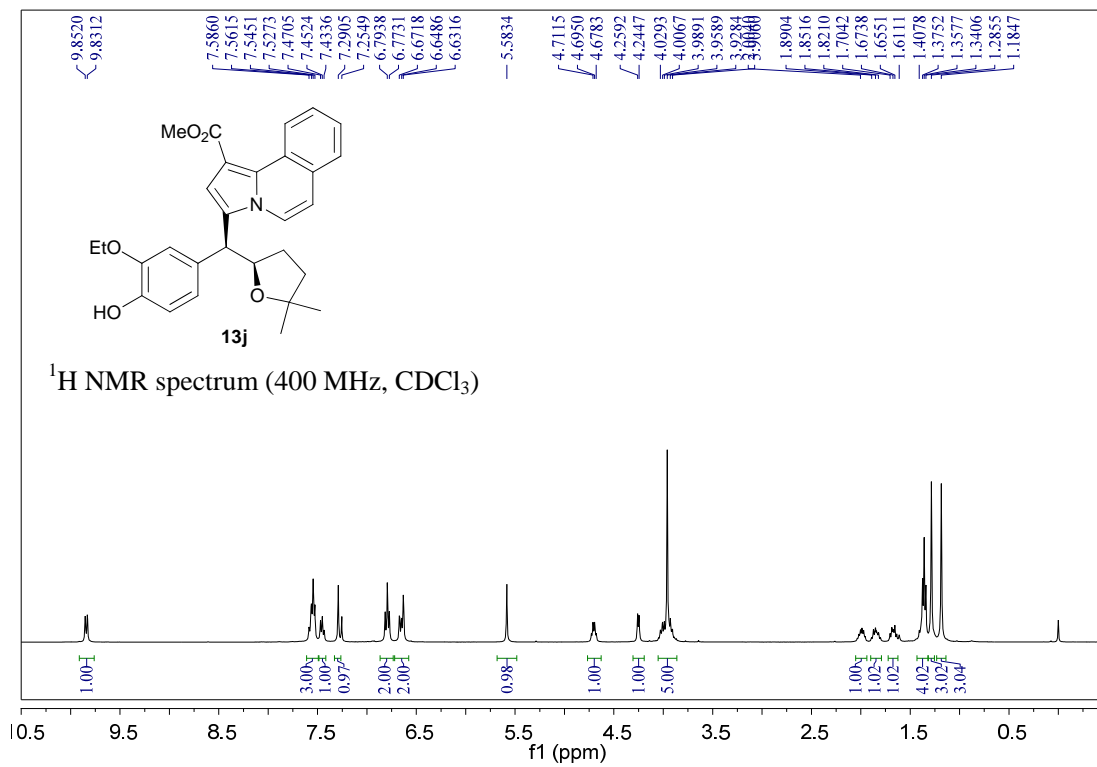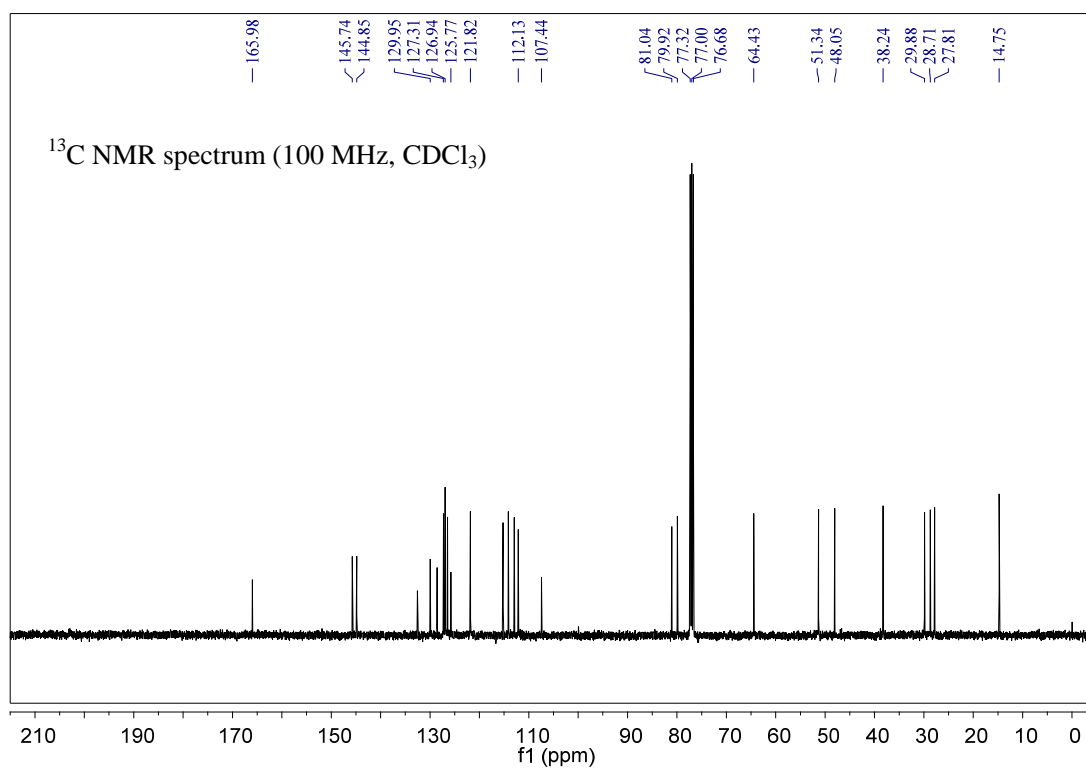

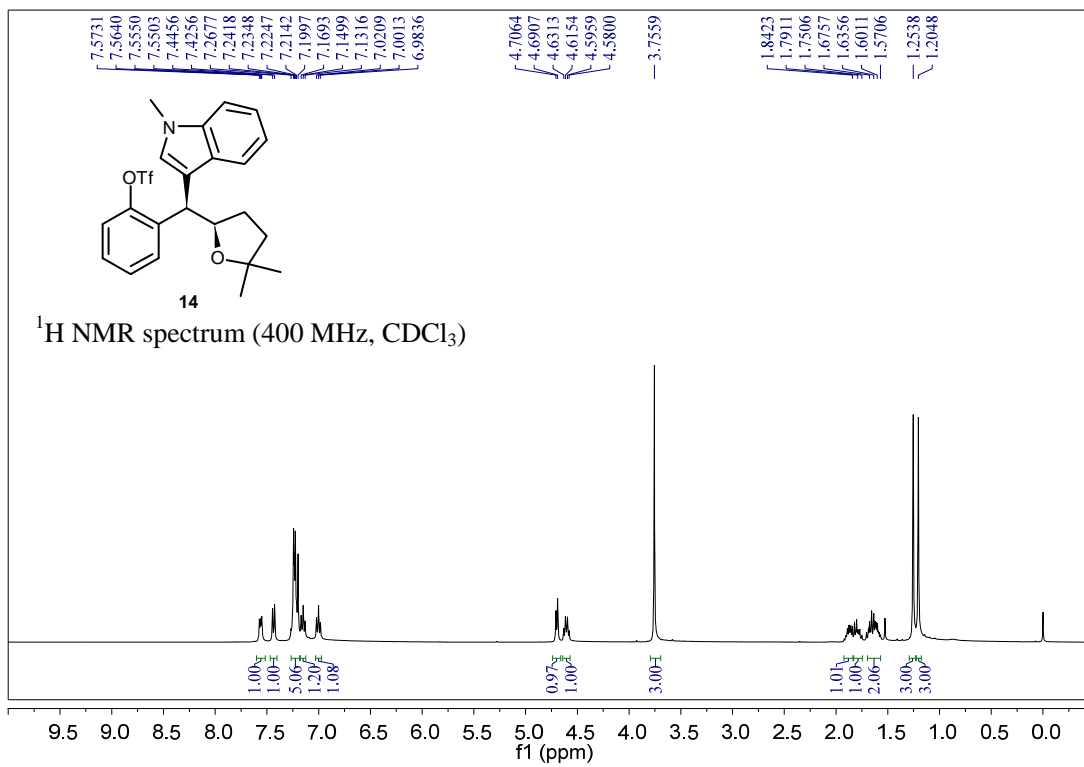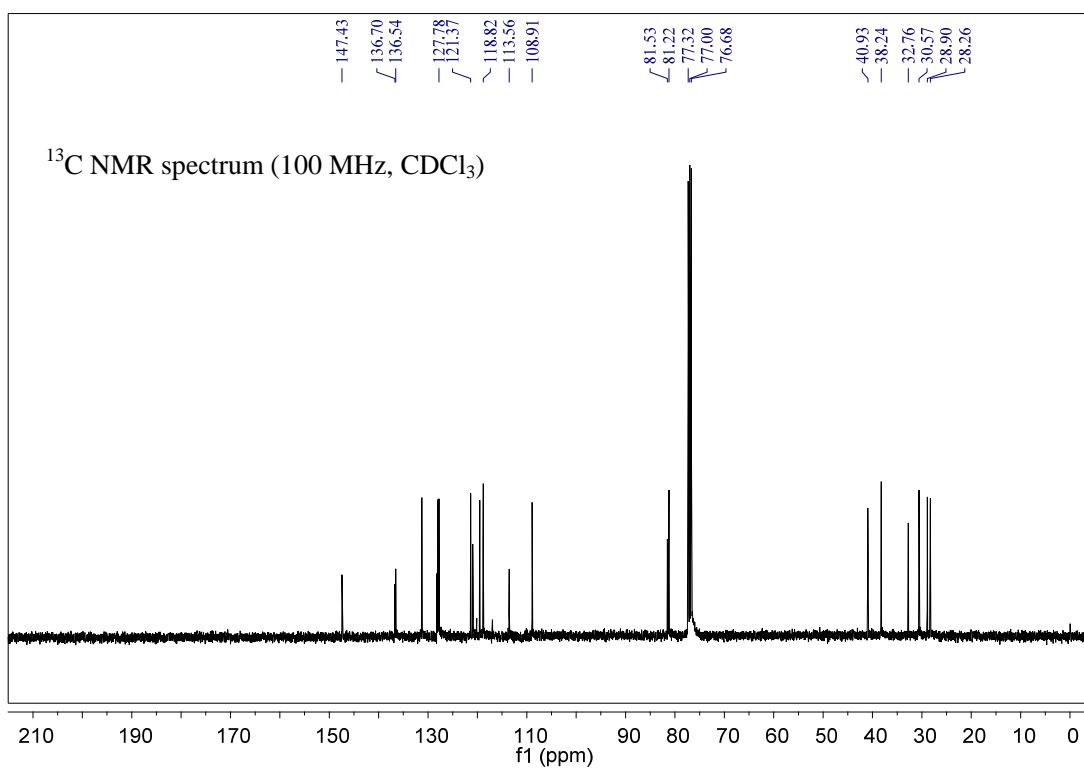

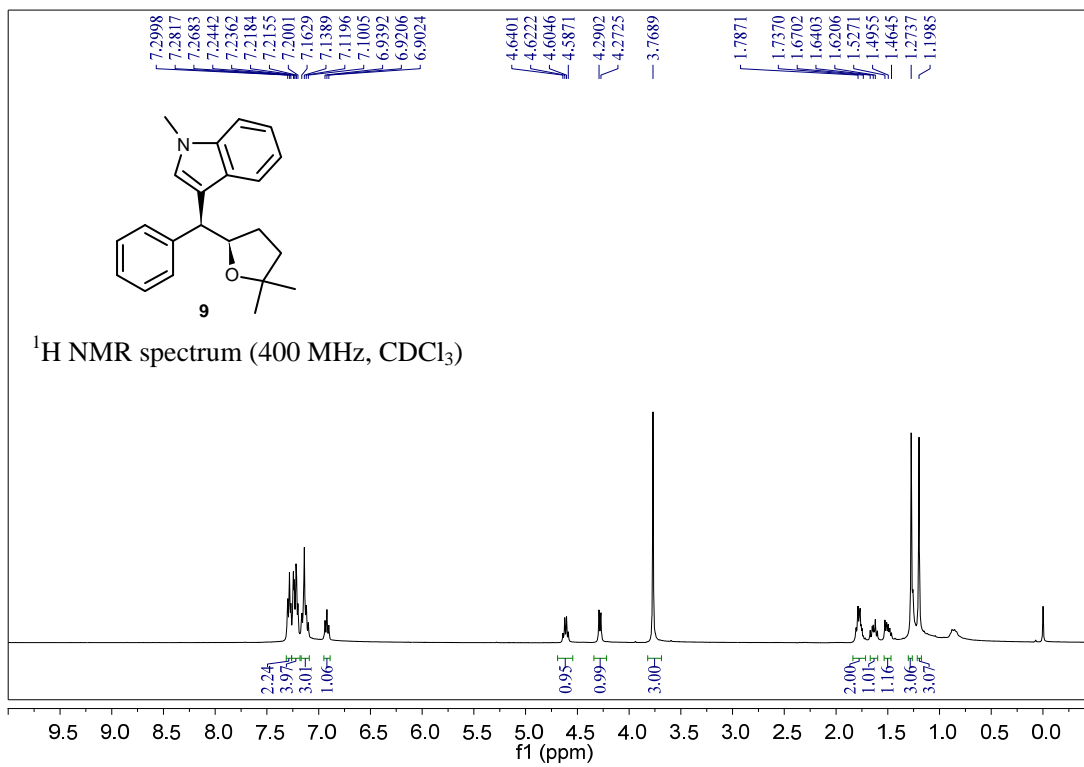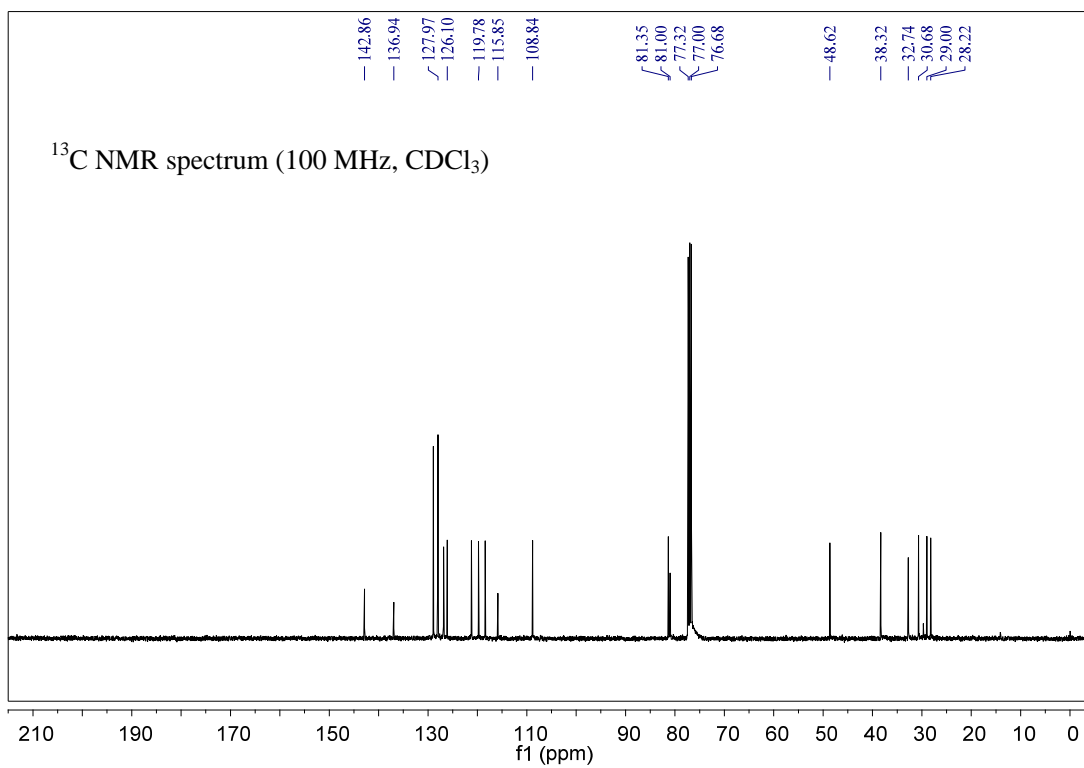

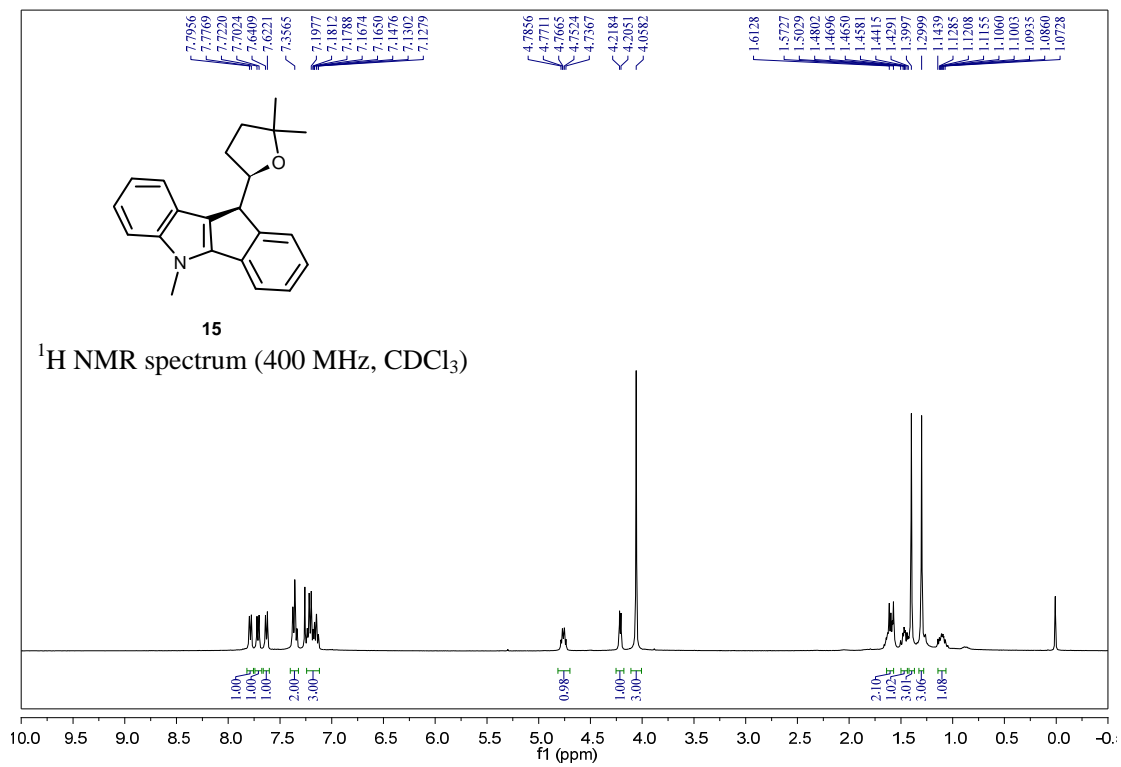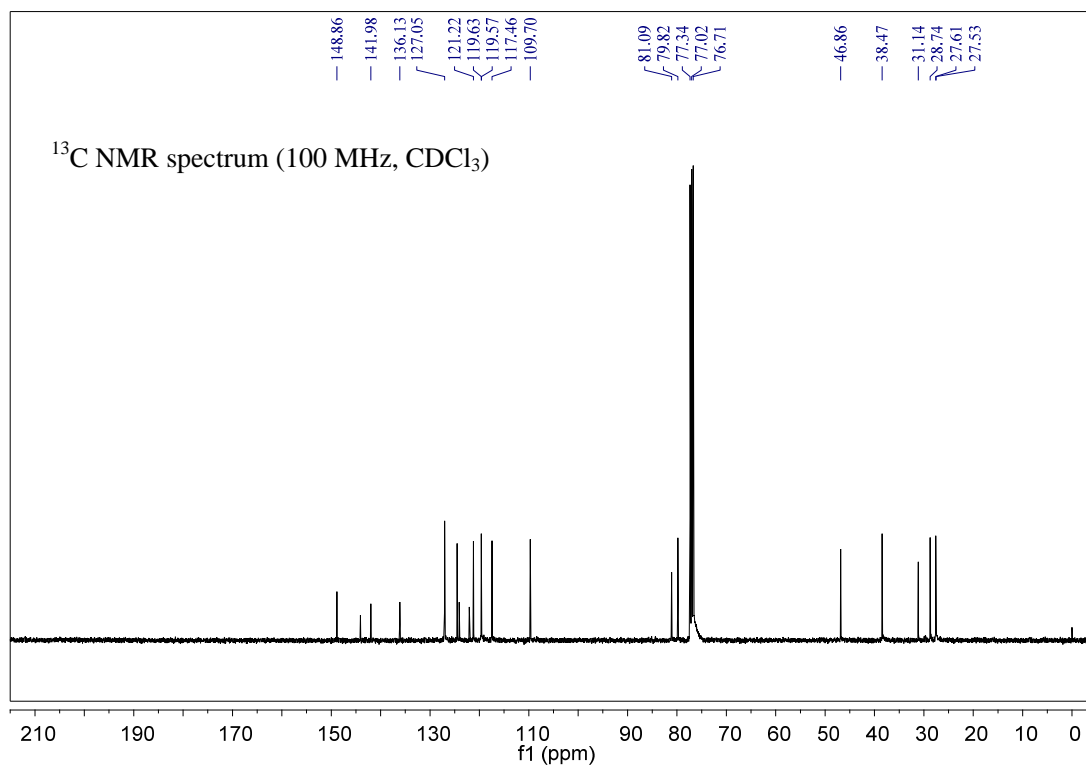



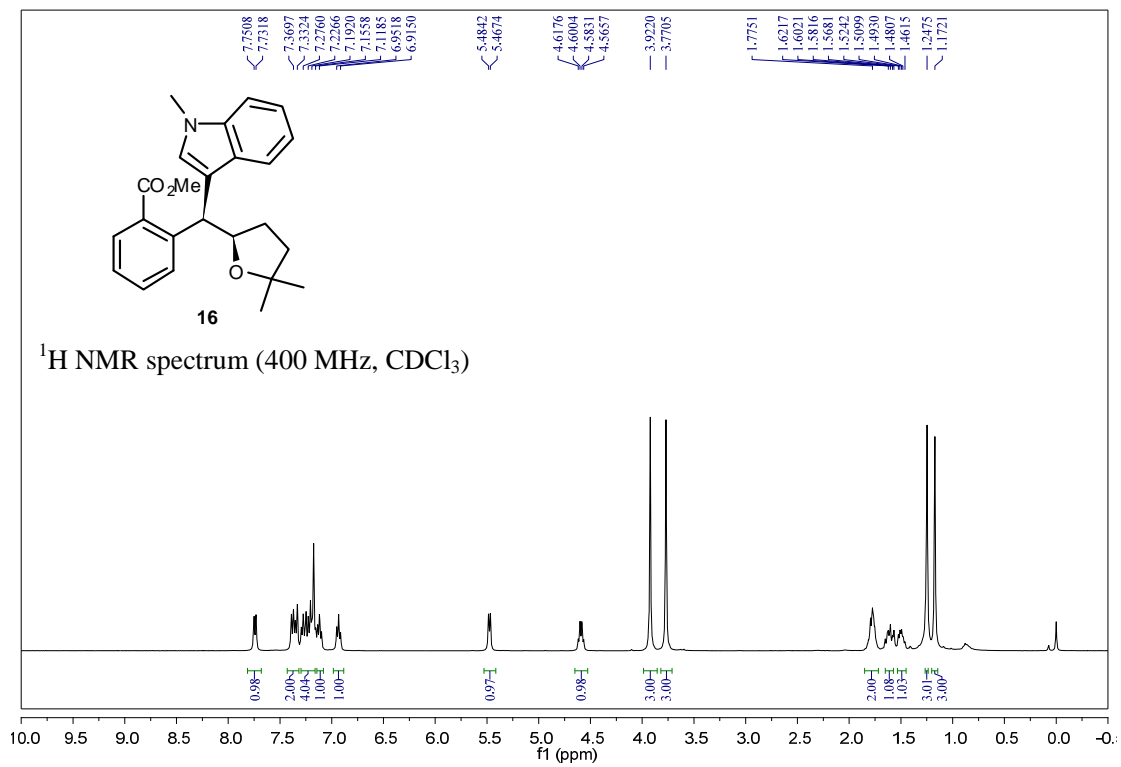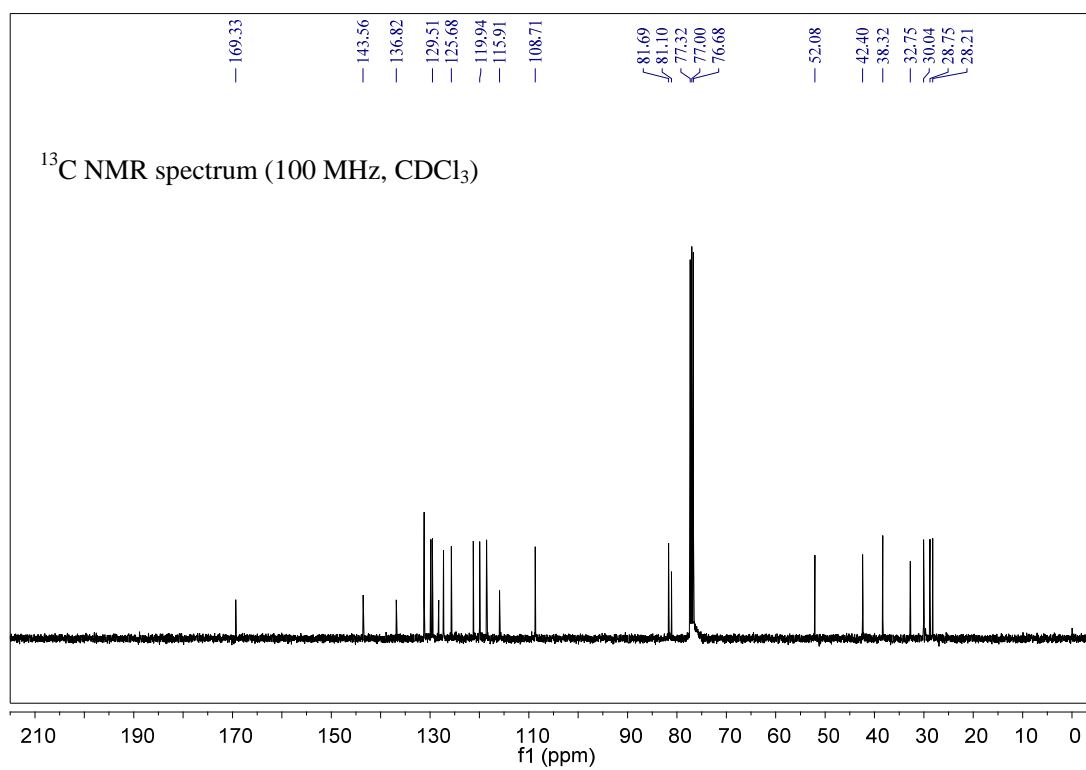

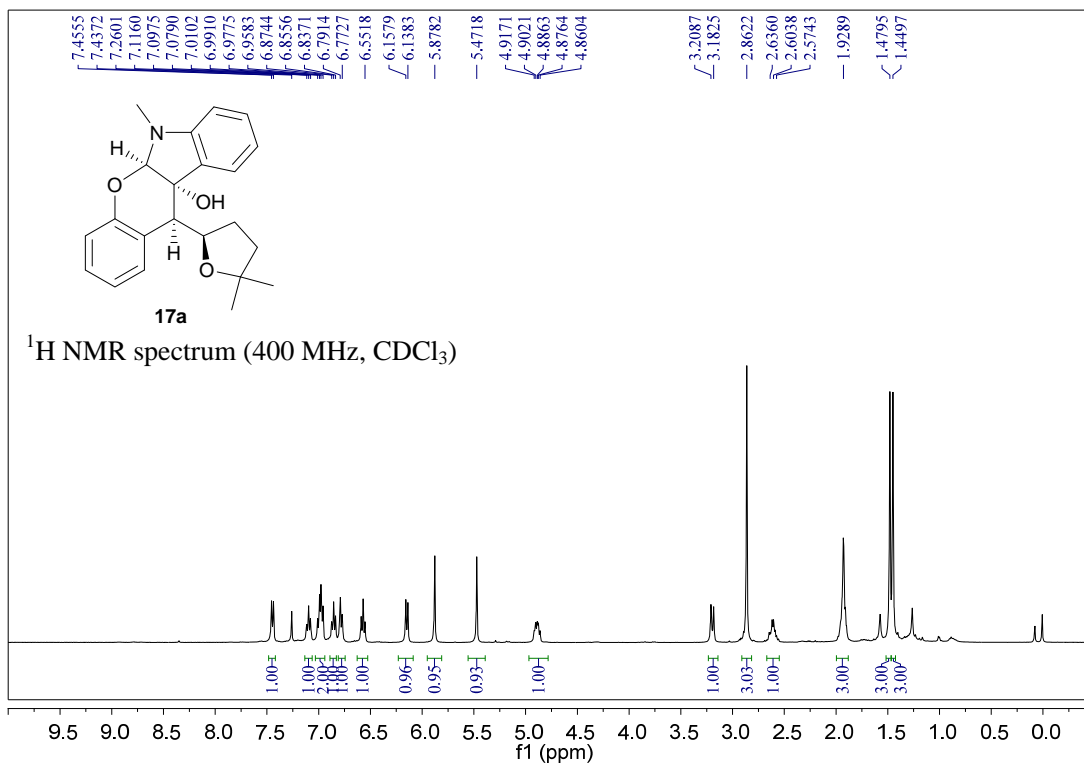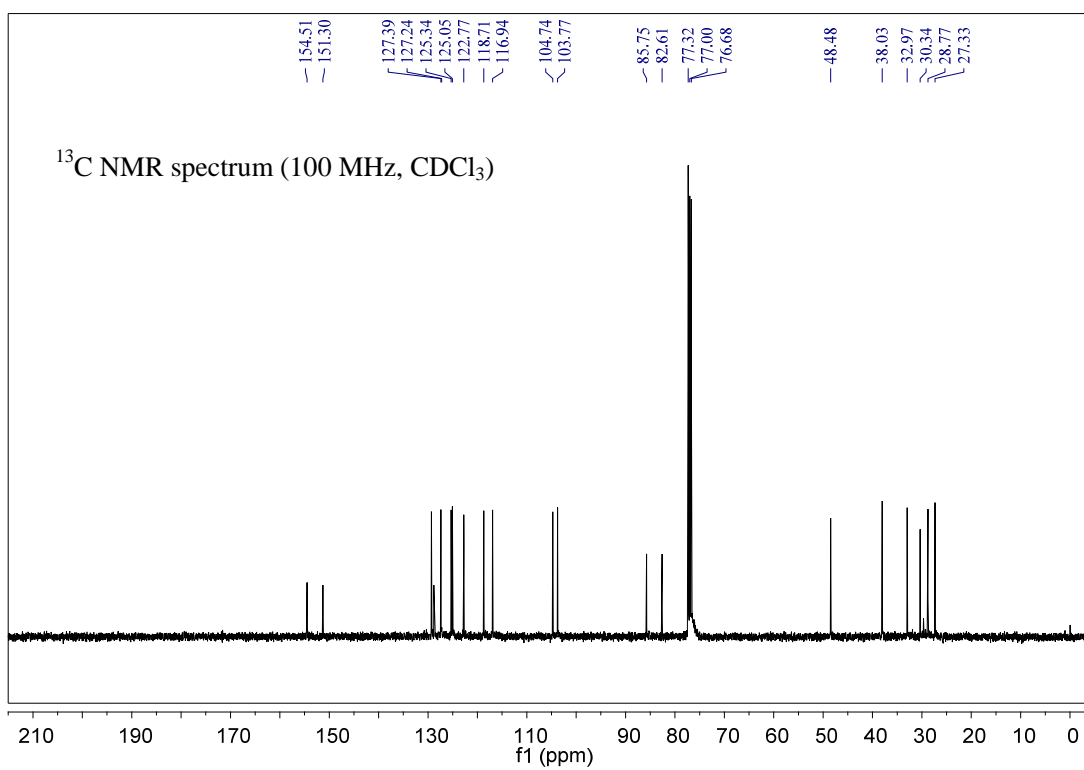

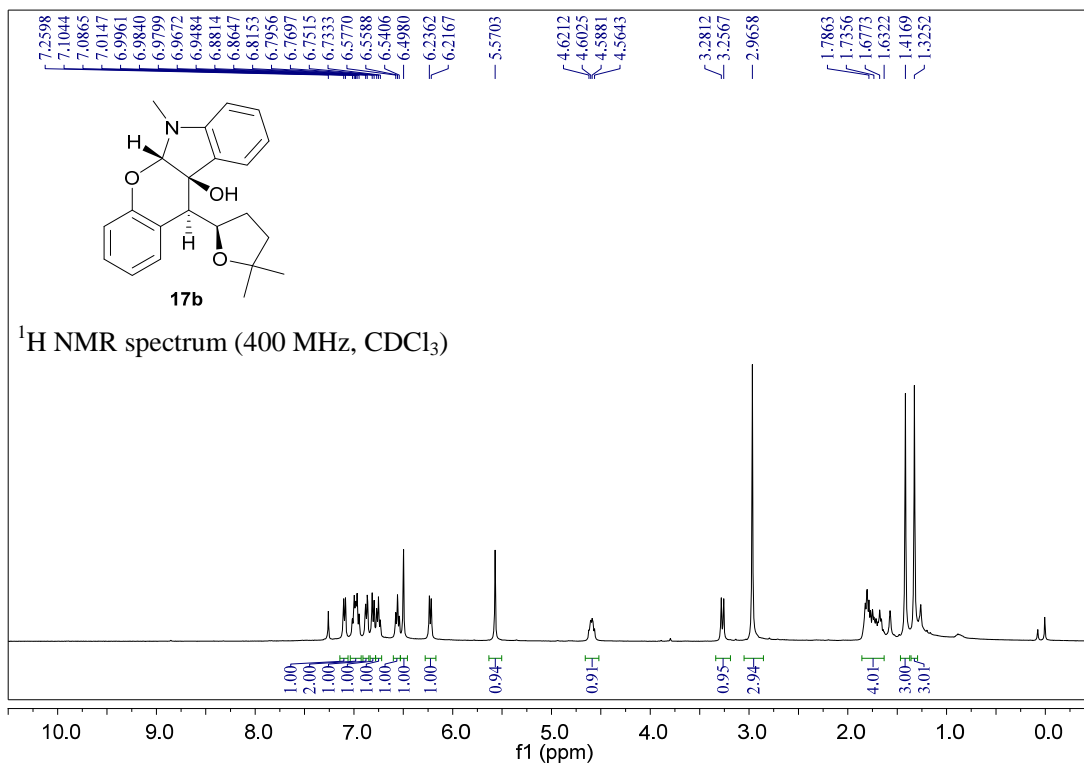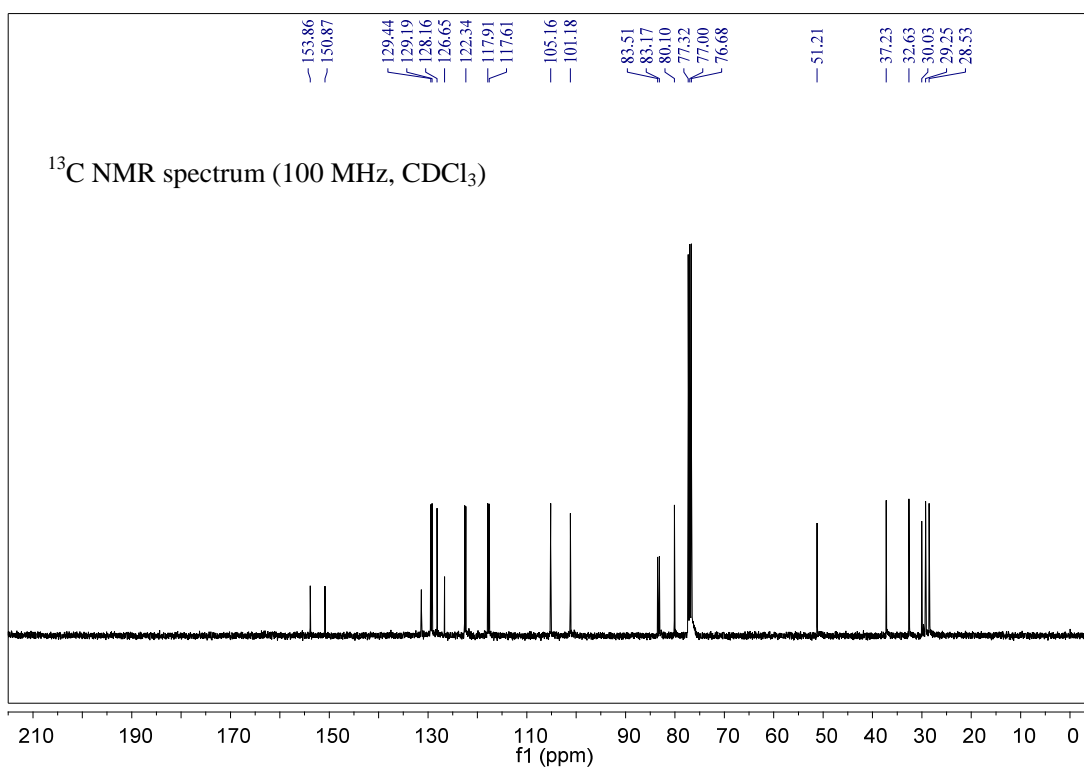

Supplement: c5cc00441a1.pdf [file c5cc00441a1.pdf]
